# Supplementary material for: Effect of oxygenated ferrocene derivatives on soot formation and nanoparticle emissions in n-heptane diffusion flames
Source: RSC Adv. 2026 Mar 16;16(16):14350–60. doi: 10.1039/d5ra09720g (PMC12990850; doi:10.1039/d5ra09720g)
Supplement: RA-016-D5RA09720G-s001 [file RA-016-D5RA09720G-s001.xlsx]

## Sheet: Figure 3 (a)
Sample Name	n-heptane-F100-BC	n-heptane-F100-AC	n-heptane-F500-BC	n-heptane-F500-AC
Wave Length (nm)	Absorbance	Absorbance	Absorbance	Absorbance
195	1.13189	1.19955	0.881135	0.642378
196	1.22845	1.34288	0.979844	0.873761
197	1.43016	1.4371	1.13732	1.02689
198	1.49308	1.55891	1.4364	1.24857
199	1.5473	1.65678	1.49805	1.39812
200	1.68702	1.79073	1.66578	1.53743
201	1.76583	1.86746	1.92132	1.68186
202	1.82919	1.94219	1.85295	1.7502
203	1.90922	1.99747	2.0497	1.96684
204	2.00273	2.12095	2.32179	1.94612
205	2.08612	2.1692	2.04589	2.07863
206	2.07685	2.18709	2.21448	2.10756
207	2.22037	2.28416	2.3318	2.27858
208	2.25658	2.31098	2.54201	2.33099
209	2.28755	2.35436	2.49338	2.30981
210	2.31176	2.36513	2.5436	2.37995
211	2.33653	2.43138	2.35697	2.3889
212	2.41686	2.44419	2.55712	2.46577
213	2.44583	2.52272	2.61818	2.54956
214	2.46233	2.56983	2.69511	2.63047
215	2.48929	2.55114	2.74841	2.5098
216	2.56509	2.59994	2.71311	2.69132
217	2.58552	2.63038	2.90119	2.89829
218	2.59187	2.67306	2.82394	2.94417
219	2.61398	2.693	2.94541	2.92363
220	2.59895	2.67429	2.92784	2.97856
221	2.61294	2.72239	2.99775	3.06479
222	2.61034	2.73612	3.04615	2.97921
223	2.61987	2.77289	3.0492	3.18454
224	2.64423	2.70805	3.06707	3.03368
225	2.63214	2.73374	3.11782	3.01403
226	2.61025	2.70943	3.1348	3.0657
227	2.57979	2.70356	3.14423	3.13488
228	2.51259	2.69421	3.37192	3.29039
229	2.49433	2.62831	3.15212	3.09545
230	2.4562	2.62435	3.28629	3.26775
231	2.41409	2.5635	3.19883	3.23278
232	2.37628	2.51539	3.13511	3.48366
233	2.345	2.50398	3.05869	3.39169
234	2.31797	2.47574	3.11897	3.30315
235	2.27499	2.43569	3.39376	3.3682
236	2.23748	2.38664	3.48178	3.47135
237	2.19765	2.34823	3.19985	3.36518
238	2.15858	2.30959	3.28082	3.45183
239	2.11872	2.28042	3.28361	3.62839
240	2.07503	2.24318	3.5517	3.35032
241	2.02946	2.18979	3.37377	3.38554
242	1.99482	2.15221	3.42734	3.26477
243	1.9563	2.11537	3.16655	3.37845
244	1.90616	2.06245	3.37224	3.36028
245	1.86394	2.02387	3.23675	3.36936
246	1.81833	1.97572	3.1657	3.36201
247	1.77408	1.92831	3.35074	3.35047
248	1.73098	1.8864	3.43653	3.2749
249	1.68494	1.84767	3.53951	3.26044
250	1.64117	1.80383	3.24906	3.26196
251	1.59947	1.76446	3.22206	3.4613
252	1.55779	1.72458	3.15701	3.61097
253	1.51703	1.67451	3.09853	3.22187
254	1.47698	1.6178	3.11818	3.33577
255	1.43096	1.56285	3.14512	3.37674
256	1.38618	1.50934	3.05516	3.36957
257	1.34284	1.4573	3.29062	3.3313
258	1.30157	1.41083	3.0892	3.75244
259	1.2617	1.36896	3.26718	3.72188
260	1.2239	1.32524	3.15995	3.34213
261	1.18303	1.28165	3.24135	3.55011
262	1.14362	1.23799	3.0843	3.12924
263	1.10254	1.19607	3.19141	3.1915
264	1.06675	1.15833	3.18361	3.45447
265	1.02988	1.12145	3.0472	3.28103
266	0.996542	1.08602	3.08227	3.36644
267	0.963887	1.05318	3.03784	3.32579
268	0.93253	1.023	3.03228	3.36243
269	0.902169	0.990736	3.04369	3.24837
270	0.870591	0.961402	3.00373	3.34628
271	0.836812	0.93039	2.98706	3.31745
272	0.800332	0.896438	3.01688	3.22183
273	0.761269	0.858575	2.92537	3.24871
274	0.719473	0.816101	2.90774	3.30823
275	0.676361	0.773494	2.91872	3.08901
276	0.631201	0.728063	2.82209	3.09516
277	0.589184	0.685545	2.83092	2.96385
278	0.56167	0.65692	2.66648	2.81772
279	0.50996	0.605771	2.52285	2.6857
280	0.458445	0.556038	2.36223	2.55373
281	0.410199	0.509136	2.19355	2.3754
282	0.36692	0.465321	2.02755	2.22158
283	0.322025	0.419772	1.85261	2.024
284	0.276444	0.373361	1.66323	1.82896
285	0.232133	0.32718	1.47096	1.6288
286	0.190971	0.285959	1.29337	1.43767
287	0.169398	0.263065	1.13588	1.27383
288	0.142795	0.234018	1.00607	1.13369
289	0.120371	0.208425	0.895852	1.01344
290	0.101238	0.186472	0.798543	0.908931
291	0.084876	0.169338	0.718787	0.82156
292	0.072272	0.155711	0.653764	0.75162
293	0.062588	0.14434	0.602807	0.696645
294	0.054484	0.133479	0.560614	0.650713
295	0.048257	0.123565	0.522835	0.608893
296	0.042967	0.114738	0.488975	0.57117
297	0.039435	0.107708	0.460907	0.538953
298	0.037068	0.10257	0.438463	0.513329
299	0.035404	0.098553	0.421514	0.49305
300	0.034544	0.095224	0.405122	0.473833
301	0.034077	0.092664	0.389476	0.455238
302	0.033632	0.089922	0.37427	0.436611
303	0.033673	0.087885	0.359421	0.418491
304	0.033864	0.086187	0.344203	0.400032
305	0.034169	0.08411	0.328821	0.381395
306	0.034659	0.082646	0.312883	0.362423
307	0.0354	0.081452	0.295737	0.34247
308	0.036185	0.080223	0.279444	0.32308
309	0.036946	0.078674	0.264785	0.305261
310	0.037586	0.077609	0.251861	0.289724
311	0.038314	0.076517	0.241491	0.276898
312	0.039286	0.075921	0.233431	0.267001
313	0.04005	0.075274	0.226939	0.258968
314	0.040854	0.07506	0.222324	0.253491
315	0.041778	0.075159	0.2192	0.249409
316	0.042286	0.074859	0.217876	0.247859
317	0.042971	0.074743	0.21772	0.24733
318	0.04391	0.074932	0.218393	0.247886
319	0.044462	0.074522	0.219808	0.249009
320	0.044933	0.0741	0.221522	0.250059
321	0.045388	0.073414	0.222468	0.250142
322	0.045746	0.072429	0.22235	0.250064
323	0.046097	0.071752	0.221997	0.248788
324	0.046109	0.070767	0.221088	0.24735
325	0.046081	0.069928	0.219839	0.245568
326	0.046229	0.069181	0.217797	0.243269
327	0.045804	0.068126	0.215109	0.240105
328	0.045594	0.067484	0.21133	0.2354
329	0.045101	0.066462	0.206936	0.23033
330	0.044185	0.065788	0.202082	0.224723
331	0.043635	0.064265	0.197462	0.219278
332	0.042923	0.063909	0.192886	0.214566
333	0.042116	0.063555	0.190004	0.211308
334	0.041059	0.062476	0.187233	0.208713
335	0.03994	0.060564	0.18358	0.204655
336	0.038468	0.057205	0.178379	0.198698
337	0.037303	0.05464	0.171621	0.190506
338	0.035692	0.052241	0.163201	0.1803
339	0.034824	0.050339	0.154025	0.170002
340	0.032052	0.046296	0.13999	0.153758
341	0.030671	0.044669	0.130074	0.142958
342	0.02935	0.043329	0.122278	0.133883
343	0.0285	0.041933	0.115293	0.126782
344	0.026635	0.040069	0.107334	0.117702
345	0.026079	0.038426	0.098758	0.107819
346	0.025188	0.037849	0.089028	0.097265
347	0.024242	0.036213	0.081098	0.088728
348	0.02315	0.034869	0.074266	0.081549
349	0.022362	0.03367	0.068373	0.075182
350	0.021432	0.032817	0.063463	0.06914
351	0.021517	0.031642	0.05822	0.064027
352	0.020721	0.030452	0.055306	0.060022
353	0.020225	0.030118	0.052482	0.05607
354	0.019583	0.028669	0.04872	0.052414
355	0.019146	0.028631	0.046788	0.049725
356	0.018656	0.027718	0.044499	0.04726
357	0.018711	0.027299	0.042095	0.044724
358	0.018516	0.026028	0.041082	0.043703
359	0.018442	0.025877	0.03974	0.042063
360	0.017599	0.025559	0.039182	0.040909
361	0.01789	0.024533	0.039145	0.040838
362	0.017924	0.024534	0.03794	0.039537
363	0.017572	0.023404	0.038213	0.04042
364	0.018262	0.023664	0.038454	0.040232
365	0.018493	0.023215	0.039284	0.041313
366	0.018386	0.023265	0.040253	0.041653
367	0.01897	0.022981	0.041832	0.042838
368	0.018972	0.023342	0.042848	0.044017
369	0.018995	0.023389	0.044633	0.045397
370	0.019058	0.022577	0.046365	0.04683
371	0.019772	0.023471	0.048988	0.049359
372	0.019766	0.023242	0.051684	0.051949
373	0.020571	0.02405	0.054119	0.054203
374	0.020635	0.023941	0.05654	0.056621
375	0.021594	0.024603	0.059495	0.059554
376	0.022588	0.025115	0.062075	0.062106
377	0.022864	0.024902	0.064889	0.065043
378	0.023894	0.025722	0.067678	0.067895
379	0.024384	0.025699	0.070848	0.071122
380	0.025201	0.025675	0.074078	0.074309
381	0.025961	0.026669	0.077688	0.078036
382	0.026707	0.027294	0.081473	0.081639
383	0.027044	0.027621	0.084742	0.085262
384	0.028318	0.028439	0.088588	0.089207
385	0.029328	0.029242	0.09275	0.09345
386	0.030261	0.029844	0.096701	0.097643
387	0.030885	0.03046	0.100672	0.101848
388	0.032021	0.031286	0.104933	0.106305
389	0.032812	0.031863	0.109031	0.11069
390	0.033595	0.032479	0.113058	0.114866
391	0.035056	0.033624	0.11667	0.118568
392	0.035578	0.034288	0.121106	0.12326
393	0.036978	0.035275	0.125726	0.127889
394	0.037929	0.036041	0.130286	0.132993
395	0.038911	0.036744	0.135263	0.137764
396	0.039913	0.037776	0.139683	0.142485
397	0.040812	0.038489	0.144209	0.146756
398	0.041932	0.039434	0.148744	0.151687
399	0.04279	0.040225	0.152723	0.156033
400	0.04354	0.04066	0.157033	0.160327
401	0.04477	0.041547	0.161222	0.164973
402	0.045481	0.042334	0.164926	0.168743
403	0.0464	0.043361	0.169024	0.172647
404	0.047338	0.044006	0.173001	0.176931
405	0.048182	0.04494	0.177322	0.181327
406	0.048963	0.045561	0.181631	0.185874
407	0.04992	0.046247	0.185629	0.190111
408	0.050824	0.04688	0.189258	0.193523
409	0.051494	0.04767	0.192378	0.197547
410	0.052405	0.048404	0.195986	0.201137
411	0.052956	0.048881	0.199459	0.204661
412	0.053708	0.049305	0.202684	0.207832
413	0.054604	0.050096	0.205065	0.21051
414	0.055073	0.050382	0.208051	0.21341
415	0.055397	0.050954	0.210657	0.216447
416	0.056268	0.051813	0.213424	0.219334
417	0.056837	0.052086	0.216122	0.222144
418	0.057485	0.052646	0.219105	0.225184
419	0.057974	0.053179	0.221425	0.227663
420	0.05828	0.053446	0.223413	0.229759
421	0.058686	0.053795	0.225448	0.231953
422	0.059272	0.05427	0.227595	0.234104
423	0.059462	0.054482	0.229313	0.235979
424	0.060043	0.054936	0.231132	0.237693
425	0.060333	0.055198	0.232551	0.239316
426	0.060552	0.055468	0.233904	0.240878
427	0.060798	0.055648	0.235115	0.242377
428	0.060988	0.055909	0.236422	0.243576
429	0.061484	0.056274	0.23746	0.24486
430	0.061566	0.056284	0.23873	0.245949
431	0.061751	0.056321	0.239592	0.24719
432	0.061948	0.056436	0.240291	0.247854
433	0.062208	0.056642	0.240951	0.24853
434	0.062098	0.056838	0.241642	0.24925
435	0.062428	0.056921	0.242101	0.249686
436	0.06204	0.05664	0.24262	0.250161
437	0.062538	0.056819	0.242976	0.250597
438	0.062383	0.056762	0.243151	0.250894
439	0.0624	0.05671	0.242985	0.250881
440	0.062377	0.05649	0.242977	0.250905
441	0.062084	0.056181	0.242915	0.250617
442	0.062143	0.056339	0.242883	0.250725
443	0.061975	0.055931	0.242347	0.250393
444	0.06177	0.05577	0.242432	0.250349
445	0.061744	0.0557	0.241783	0.249703
446	0.06144	0.055423	0.24109	0.249257
447	0.061158	0.05513	0.240519	0.248609
448	0.061137	0.054986	0.239798	0.247729
449	0.06082	0.054688	0.239005	0.246889
450	0.060795	0.054747	0.23842	0.246349
451	0.060349	0.05423	0.236614	0.244622
452	0.060098	0.054	0.235775	0.243696
453	0.059846	0.053579	0.23445	0.242272
454	0.059373	0.053422	0.232949	0.240689
455	0.059021	0.05299	0.231571	0.239079
456	0.05849	0.052356	0.229842	0.237376
457	0.05824	0.052147	0.228074	0.235599
458	0.057813	0.051718	0.226273	0.233688
459	0.057247	0.051029	0.224358	0.231694
460	0.056591	0.050477	0.222382	0.229757
461	0.056345	0.050161	0.220144	0.227422
462	0.055701	0.049737	0.21831	0.225675
463	0.055265	0.049025	0.216042	0.223153
464	0.054801	0.048515	0.213534	0.220579
465	0.053913	0.047897	0.210607	0.217504
466	0.053428	0.047047	0.207667	0.214579
467	0.05252	0.046374	0.204755	0.211463
468	0.051768	0.045696	0.201895	0.208501
469	0.050969	0.044909	0.198583	0.205113
470	0.050492	0.044264	0.19565	0.202016
471	0.049693	0.04377	0.192512	0.19886
472	0.048593	0.042461	0.189217	0.195215
473	0.048112	0.042175	0.186209	0.192067
474	0.047235	0.041203	0.183161	0.188895
475	0.046447	0.040469	0.179419	0.185263
476	0.045413	0.039387	0.175685	0.181411
477	0.044429	0.038648	0.171675	0.177181
478	0.043497	0.037521	0.167838	0.173141
479	0.042585	0.036797	0.164038	0.169194
480	0.041726	0.035894	0.159907	0.164962
481	0.040803	0.034923	0.156407	0.161219
482	0.039793	0.03408	0.152408	0.157176
483	0.038935	0.033324	0.148479	0.152872
484	0.038092	0.032338	0.144333	0.148849
485	0.03712	0.031599	0.140854	0.145328
486	0.036176	0.030593	0.136885	0.140898
487	0.035209	0.029519	0.132823	0.136798
488	0.034153	0.028663	0.128906	0.132734
489	0.033103	0.027796	0.124924	0.12829
490	0.032199	0.026783	0.120515	0.124015
491	0.031361	0.026023	0.1166	0.120141
492	0.030392	0.025189	0.112777	0.116033
493	0.029619	0.02446	0.108901	0.111963
494	0.028446	0.023207	0.104982	0.107956
495	0.027613	0.022569	0.101244	0.103901
496	0.026556	0.021615	0.097534	0.100088
497	0.025747	0.020804	0.093714	0.096137
498	0.024997	0.020059	0.090438	0.092624
499	0.024198	0.019176	0.087181	0.089225
500	0.023299	0.018313	0.083665	0.085592
501	0.02264	0.01766	0.080186	0.081967
502	0.021748	0.016873	0.076558	0.0783
503	0.021009	0.016153	0.073395	0.074789
504	0.020359	0.015432	0.070029	0.071416
505	0.019416	0.01466	0.06707	0.068208
506	0.018833	0.014066	0.063986	0.065131
507	0.017971	0.013409	0.060891	0.061981
508	0.017393	0.012739	0.058119	0.05902
509	0.016798	0.012318	0.055512	0.056253
510	0.016075	0.01166	0.053149	0.053724
511	0.015443	0.010865	0.050771	0.051264
512	0.014915	0.010287	0.048221	0.048702
513	0.014202	0.009743	0.045715	0.045943
514	0.013848	0.009275	0.04342	0.04358
515	0.013231	0.008725	0.041116	0.041137
516	0.012715	0.008547	0.03869	0.038694
517	0.012114	0.007866	0.036654	0.036532
518	0.011542	0.007238	0.034784	0.03451
519	0.011109	0.006791	0.032781	0.03245
520	0.010905	0.006607	0.031051	0.030679
521	0.010396	0.006059	0.029395	0.028861
522	0.009937	0.005717	0.028026	0.027422
523	0.00979	0.005246	0.026573	0.025964
524	0.009422	0.004969	0.025003	0.024383
525	0.009117	0.004767	0.023497	0.022842
526	0.008469	0.004246	0.022174	0.021328
527	0.008319	0.00403	0.020541	0.019821
528	0.00791	0.003672	0.01944	0.018515
529	0.007637	0.003421	0.01835	0.017292
530	0.007464	0.003166	0.017353	0.01602
531	0.007234	0.003178	0.016165	0.015092
532	0.00693	0.002891	0.015287	0.014128
533	0.006602	0.002386	0.014494	0.013167
534	0.00653	0.002421	0.013612	0.012386
535	0.006182	0.002073	0.012868	0.011548
536	0.006045	0.001844	0.012036	0.010632
537	0.005923	0.001758	0.011171	0.009947
538	0.005798	0.001745	0.010479	0.00918
539	0.005665	0.001631	0.009744	0.008376
540	0.005411	0.001373	0.009238	0.007887
541	0.00528	0.001142	0.008695	0.007312
542	0.005191	0.001171	0.008144	0.006755
543	0.00508	0.001073	0.00776	0.006188
544	0.004952	0.000817	0.00722	0.005787
545	0.004723	0.00069	0.006904	0.005318
546	0.004483	0.000556	0.006512	0.004938
547	0.004593	0.00061	0.006207	0.004691
548	0.004421	0.000413	0.005833	0.00422
549	0.004361	0.000354	0.005538	0.003916
550	0.00423	0.000286	0.005121	0.003629
551	0.004119	0.000104	0.005	0.003324
552	0.004087	0.000101	0.004796	0.003137
553	0.003859	-0.000179	0.004485	0.002821
554	0.003945	-2.6e-05	0.004294	0.00263
555	0.003925	-9.9e-05	0.004035	0.002269
556	0.003782	-0.000254	0.003692	0.002042
557	0.003761	-0.000224	0.00361	0.001873
558	0.003686	-0.000384	0.003462	0.001706
559	0.003589	-0.000302	0.003266	0.001556
560	0.003469	-0.000501	0.00316	0.001362
561	0.00344	-0.000513	0.003003	0.001204
562	0.003499	-0.000559	0.002976	0.001037
563	0.003454	-0.000506	0.002911	0.000994
564	0.003372	-0.00056	0.002799	0.000944
565	0.003293	-0.000681	0.002738	0.000777
566	0.003392	-0.000443	0.002465	0.000706
567	0.003272	-0.000646	0.002487	0.000582
568	0.003166	-0.000658	0.002505	0.000558
569	0.003208	-0.00072	0.002506	0.000531
570	0.003089	-0.000802	0.002383	0.000565
571	0.003145	-0.000804	0.002251	0.000432
572	0.003158	-0.000764	0.002222	0.000294
573	0.003108	-0.000817	0.002184	0.000366
574	0.003117	-0.000776	0.002136	0.000183
575	0.003261	-0.000766	0.002126	0.000272
576	0.003215	-0.00074	0.002121	0.000262
577	0.002921	-0.000932	0.001999	0.000197
578	0.002879	-0.000935	0.001932	6.2e-05
579	0.002784	-0.001059	0.001908	0.000107
580	0.002943	-0.000967	0.002062	6.1e-05
581	0.002798	-0.000983	0.001833	-0.00015
582	0.002905	-0.000917	0.001774	-4.4e-05
583	0.002663	-0.001102	0.001921	-6.4e-05
584	0.002928	-0.000964	0.001759	3.4e-05
585	0.002732	-0.001233	0.001719	-9.2e-05
586	0.003248	-0.000705	0.00186	0.000135
587	0.003129	-0.000752	0.001947	-7.9e-05
588	0.003314	-0.000733	0.00171	-0.000102
589	0.003334	-0.00067	0.001723	-0.000156
590	0.003019	-0.00093	0.00162	-0.000263
591	0.003215	-0.000869	0.001752	-0.000164
592	0.003008	-0.000864	0.001699	-0.000316
593	0.003086	-0.000809	0.00182	-0.000231
594	0.003033	-0.000785	0.001679	-0.000379
595	0.003114	-0.00089	0.001709	-0.000353
596	0.003163	-0.000659	0.001607	-0.000265
597	0.00304	-0.00092	0.001737	-0.000206
598	0.003158	-0.000701	0.001694	-0.000266
599	0.003097	-0.000952	0.001697	-0.000189
600	0.003135	-0.000794	0.001703	-0.000238
601	0.002867	-0.001036	0.001478	-0.000401
602	0.002915	-0.001085	0.001591	-0.000347
603	0.003114	-0.000814	0.001698	-0.000177
604	0.003078	-0.000792	0.001573	-0.000306
605	0.002961	-0.000981	0.001686	-0.000377
606	0.002847	-0.000936	0.00153	-0.000283
607	0.002864	-0.000965	0.001529	-0.000369
608	0.002937	-0.001009	0.001516	-0.000465
609	0.002959	-0.000906	0.001514	-0.000245
610	0.003021	-0.000905	0.001395	-0.000427
611	0.002818	-0.000939	0.001581	-0.000275
612	0.002831	-0.001048	0.001483	-0.000266
613	0.002843	-0.001132	0.001527	-0.000414
614	0.002848	-0.001013	0.00153	-0.000368
615	0.002712	-0.001111	0.001477	-0.000315
616	0.002779	-0.001056	0.001524	-0.000352
617	0.002936	-0.001112	0.001453	-0.000407
618	0.002761	-0.001047	0.001546	-0.000216
619	0.002823	-0.001044	0.001448	-0.000392
620	0.002565	-0.001428	0.001493	-0.000452
621	0.002555	-0.001151	0.001329	-0.000568
622	0.002649	-0.001236	0.001539	-0.000427
623	0.002584	-0.001235	0.001421	-0.000483
624	0.002646	-0.00134	0.00153	-0.000276
625	0.002802	-0.001201	0.001499	-0.000336
626	0.002652	-0.001176	0.001275	-0.000595
627	0.002554	-0.001081	0.001518	-0.000248
628	0.00261	-0.001228	0.00147	-0.000465
629	0.002478	-0.001273	0.001434	-0.000462
630	0.002764	-0.001095	0.001433	-0.000437
631	0.002513	-0.001293	0.001432	-0.000463
632	0.00255	-0.001277	0.001308	-0.000455
633	0.002661	-0.00116	0.001294	-0.000386
634	0.002662	-0.001045	0.001319	-0.000322
635	0.002595	-0.001348	0.001231	-0.000328
636	0.002622	-0.001091	0.001338	-0.000417
637	0.002418	-0.001372	0.00133	-0.00037
638	0.002423	-0.001403	0.001337	-0.000405
639	0.002465	-0.00135	0.001298	-0.000317
640	0.002394	-0.001426	0.001289	-0.000343
641	0.002471	-0.001227	0.001379	-0.000391
642	0.002559	-0.001364	0.001409	-0.000289
643	0.002582	-0.001412	0.001323	-0.000441
644	0.002511	-0.001394	0.001334	-0.000441
645	0.002504	-0.001418	0.001188	-0.000531
646	0.002318	-0.00144	0.001215	-0.000582
647	0.002503	-0.00146	0.001311	-0.000397
648	0.00234	-0.001465	0.001217	-0.000371
649	0.002469	-0.001345	0.001289	-0.000443
650	0.00226	-0.001563	0.001323	-0.00039
651	0.002438	-0.001411	0.001296	-0.000482
652	0.002569	-0.001112	0.001239	-0.000509
653	0.002423	-0.001352	0.001317	-0.000358
654	0.00224	-0.001505	0.001237	-0.000431
655	0.002205	-0.001619	0.001225	-0.000659
656	0.00234	-0.001458	0.001324	-0.000401
657	0.002125	-0.001701	0.001219	-0.000509
658	0.002307	-0.001521	0.001298	-0.000535
659	0.002218	-0.001361	0.00126	-0.000568
660	0.002315	-0.00158	0.001374	-0.000387
661	0.002161	-0.001599	0.001237	-0.000359
662	0.002048	-0.001889	0.001272	-0.000641
663	0.002125	-0.001735	0.001208	-0.00049
664	0.002057	-0.001816	0.001348	-0.000467
665	0.002195	-0.001675	0.001302	-0.000416
666	0.002105	-0.001857	0.00122	-0.000416
667	0.002192	-0.001721	0.001362	-0.000454
668	0.00226	-0.001755	0.001419	-0.000389
669	0.002243	-0.001496	0.001237	-0.000499
670	0.002309	-0.0016	0.001164	-0.000493
671	0.002429	-0.001541	0.001231	-0.000616
672	0.002209	-0.001621	0.001177	-0.000516
673	0.002218	-0.001698	0.001418	-0.000477
674	0.001993	-0.001719	0.00129	-0.000466
675	0.002049	-0.001689	0.001396	-0.000475
676	0.002119	-0.001612	0.001152	-0.000577
677	0.002244	-0.00172	0.001105	-0.000594
678	0.001973	-0.001982	0.001138	-0.000592
679	0.002169	-0.001716	0.001125	-0.000571
680	0.002192	-0.001696	0.001221	-0.000594
681	0.001989	-0.001703	0.001239	-0.000629
682	0.002028	-0.001665	0.00134	-0.000563
683	0.001968	-0.001944	0.001329	-0.000521
684	0.001991	-0.001761	0.001218	-0.000496
685	0.002151	-0.001698	0.001148	-0.000499
686	0.002107	-0.001824	0.001004	-0.000768
687	0.001953	-0.001846	0.001234	-0.000477
688	0.001992	-0.001788	0.001283	-0.000563
689	0.002104	-0.00173	0.001139	-0.000681
690	0.001958	-0.001845	0.001135	-0.000604
691	0.001987	-0.001968	0.001132	-0.000638
692	0.001951	-0.001767	0.001179	-0.000586
693	0.00191	-0.001929	0.001266	-0.000476
694	0.00195	-0.001877	0.001132	-0.00061
695	0.001811	-0.002076	0.001096	-0.00061
696	0.001821	-0.00201	0.001184	-0.000669
697	0.002084	-0.001884	0.001152	-0.000722
698	0.00197	-0.001945	0.001204	-0.000645
699	0.001976	-0.001886	0.001118	-0.000729
700	0.001975	-0.001903	0.00126	-0.000517
701	0.001914	-0.002025	0.001144	-0.000647
702	0.001872	-0.002096	0.001077	-0.000805
703	0.001884	-0.002175	0.001189	-0.0006
704	0.001818	-0.002132	0.001115	-0.00074
705	0.001933	-0.002029	0.001175	-0.000548
706	0.001875	-0.002114	0.00124	-0.000633
707	0.001901	-0.002075	0.001215	-0.000622
708	0.001932	-0.001982	0.00115	-0.000758
709	0.001808	-0.002066	0.001258	-0.000583
710	0.001867	-0.002086	0.001136	-0.000797
711	0.001791	-0.002193	0.001273	-0.000638
712	0.001793	-0.002223	0.001142	-0.000719
713	0.001833	-0.002162	0.001145	-0.000807
714	0.001653	-0.002289	0.001123	-0.000814
715	0.001766	-0.002181	0.001024	-0.000796
716	0.001706	-0.002292	0.00109	-0.0008
717	0.001622	-0.002334	0.00115	-0.000656
718	0.0017	-0.002177	0.00122	-0.000805
719	0.001773	-0.002166	0.001125	-0.000739
720	0.001703	-0.002168	0.001121	-0.000752
721	0.001795	-0.002234	0.001161	-0.000835
722	0.001712	-0.002284	0.001044	-0.000683
723	0.001586	-0.002341	0.001204	-0.000633
724	0.001777	-0.002149	0.001101	-0.000796
725	0.001659	-0.002203	0.001149	-0.000682
726	0.001609	-0.002316	0.001148	-0.000763
727	0.001774	-0.002112	0.001008	-0.000814
728	0.001816	-0.002186	0.000968	-0.000828
729	0.001745	-0.002218	0.00087	-0.000952
730	0.001741	-0.002191	0.001062	-0.000798
731	0.001747	-0.002239	0.001087	-0.000817
732	0.001711	-0.002324	0.001244	-0.000741
733	0.001652	-0.002305	0.001123	-0.000741
734	0.001803	-0.002274	0.000942	-0.000847
735	0.001619	-0.002326	0.001045	-0.000699
736	0.001651	-0.002217	0.001086	-0.000796
737	0.001555	-0.002426	0.001152	-0.000683
738	0.001558	-0.00244	0.001153	-0.000757
739	0.001542	-0.002433	0.00119	-0.000721
740	0.001802	-0.00227	0.001111	-0.00074
741	0.001672	-0.002357	0.001203	-0.000647
742	0.00163	-0.002371	0.001098	-0.000581
743	0.00161	-0.002391	0.001072	-0.000801
744	0.001651	-0.002349	0.001045	-0.000799
745	0.001614	-0.002356	0.000996	-0.000713
746	0.001523	-0.002574	0.001205	-0.00062
747	0.001614	-0.002439	0.001041	-0.000701
748	0.001584	-0.002487	0.001088	-0.000755
749	0.001442	-0.002482	0.00104	-0.00075
750	0.0016	-0.002458	0.001009	-0.00077
751	0.00169	-0.002364	0.001206	-0.00065
752	0.001531	-0.002561	0.001051	-0.000693
753	0.001766	-0.002407	0.001217	-0.000741
754	0.001703	-0.002381	0.001141	-0.000766
755	0.001576	-0.002491	0.001115	-0.000774
756	0.00162	-0.002571	0.001222	-0.000722
757	0.001512	-0.00242	0.001073	-0.000724
758	0.001582	-0.002539	0.001081	-0.000757
759	0.001524	-0.002574	0.0012	-0.000689
760	0.001433	-0.002738	0.001081	-0.000736
761	0.00157	-0.002496	0.001242	-0.000644
762	0.001488	-0.002613	0.00103	-0.000813
763	0.001508	-0.00272	0.001054	-0.000774
764	0.001623	-0.002432	0.001145	-0.000757
765	0.001572	-0.002636	0.001044	-0.000841
766	0.001663	-0.002448	0.001059	-0.000702
767	0.001536	-0.0026	0.001047	-0.000741
768	0.001449	-0.002649	0.001169	-0.000685
769	0.001351	-0.002684	0.001153	-0.000854
770	0.00145	-0.002702	0.001232	-0.000645
771	0.001532	-0.002581	0.001105	-0.000742
772	0.001405	-0.002686	0.001125	-0.000709
773	0.001545	-0.00264	0.00114	-0.000634
774	0.001445	-0.002564	0.00106	-0.000762
775	0.001688	-0.002492	0.001036	-0.000792
776	0.001552	-0.002544	0.001112	-0.000776
777	0.001611	-0.002636	0.0009	-0.000929
778	0.001518	-0.002638	0.001114	-0.00085
779	0.001498	-0.002593	0.001151	-0.000758
780	0.001362	-0.002757	0.001096	-0.00069
781	0.001478	-0.002624	0.001085	-0.000747
782	0.001444	-0.002813	0.00119	-0.000799
783	0.001403	-0.002715	0.001069	-0.00088
784	0.001475	-0.002682	0.001136	-0.000613
785	0.001419	-0.002822	0.001089	-0.000846
786	0.001485	-0.002601	0.001135	-0.00072
787	0.001539	-0.002535	0.001019	-0.000963
788	0.001411	-0.002725	0.001187	-0.000837
789	0.00148	-0.002919	0.00113	-0.000837
790	0.001579	-0.002792	0.001102	-0.000805
791	0.001164	-0.002959	0.001117	-0.000847
792	0.001305	-0.00289	0.001297	-0.000766
793	0.001467	-0.002685	0.001258	-0.000867
794	0.0014	-0.002792	0.001106	-0.000933
795	0.001336	-0.00296	0.00112	-0.00085
796	0.001148	-0.003016	0.001123	-0.000849
797	0.001053	-0.003129	0.001209	-0.000738
798	0.000828	-0.003413	0.001181	-0.00081
799	0.000834	-0.003479	0.000997	-0.000864
800	0.000362	-0.003913	0.001159	-0.000769

## Sheet: Figure 3 (b)
Sample Name	n-heptane-FM100-BC	n-heptane-FM100-AC	n-heptane-FM500-BC	n-heptane-FM500-AC
Wave Length (nm)	Absorbance	Absorbance	Abs	Absorbance
195	0.301162	0.326199	1.03248	0.784387
196	0.434533	0.466188	1.11533	0.8868
197	0.594347	0.629151	1.23516	1.02917
198	0.704351	0.737677	1.31955	1.0852
199	0.841602	0.877153	1.41784	1.19838
200	0.956285	0.967622	1.49992	1.31191
201	1.0416	1.07524	1.62535	1.39591
202	1.12362	1.17555	1.69435	1.46585
203	1.22005	1.26922	1.75403	1.55359
204	1.28325	1.34299	1.83883	1.64166
205	1.34378	1.39899	1.96681	1.71797
206	1.4186	1.46633	2.00804	1.80812
207	1.46121	1.5211	2.06073	1.86478
208	1.54058	1.59174	2.1377	1.93142
209	1.58847	1.64009	2.18724	1.96744
210	1.63906	1.69792	2.25399	2.0273
211	1.69466	1.75371	2.32284	2.08214
212	1.75725	1.81276	2.35586	2.14935
213	1.80957	1.86291	2.43077	2.2185
214	1.89299	1.94589	2.46258	2.20861
215	1.95471	2.00468	2.52484	2.24901
216	2.00177	2.04341	2.53286	2.31339
217	2.04787	2.10989	2.56583	2.34106
218	2.10932	2.16519	2.58518	2.38528
219	2.17525	2.2104	2.6493	2.40621
220	2.18977	2.21921	2.60652	2.37114
221	2.21805	2.25862	2.61944	2.40968
222	2.22357	2.27752	2.66185	2.44573
223	2.22425	2.27878	2.66545	2.45698
224	2.24197	2.30174	2.66502	2.47621
225	2.22919	2.28574	2.78593	2.53026
226	2.19584	2.28265	2.74026	2.50861
227	2.17258	2.28561	2.76745	2.49801
228	2.12986	2.27259	2.73419	2.54505
229	2.09711	2.24458	2.74371	2.53348
230	2.06059	2.22062	2.83916	2.54282
231	2.0026	2.18155	2.79701	2.58803
232	1.96625	2.14283	2.81317	2.59654
233	1.92349	2.11014	2.81541	2.588
234	1.88577	2.06222	2.79617	2.61216
235	1.84074	2.02863	2.80099	2.63177
236	1.80065	1.98916	2.85186	2.64184
237	1.76434	1.94505	2.86266	2.64061
238	1.73392	1.91251	2.84137	2.65003
239	1.7008	1.87117	2.91543	2.61327
240	1.67335	1.84392	2.86856	2.62209
241	1.64162	1.80848	2.83483	2.62125
242	1.62197	1.78867	2.8381	2.63467
243	1.59444	1.76099	2.8409	2.60964
244	1.57177	1.73545	2.81889	2.61707
245	1.5485	1.70807	2.80567	2.61278
246	1.52741	1.68724	2.86905	2.62455
247	1.50205	1.66043	2.78957	2.5755
248	1.47991	1.6379	2.82252	2.62997
249	1.45132	1.61574	2.77483	2.5829
250	1.42587	1.5902	2.81276	2.59013
251	1.39971	1.56767	2.82905	2.60158
252	1.3709	1.53618	2.83362	2.60109
253	1.33879	1.49315	2.77062	2.6039
254	1.30456	1.43784	2.8116	2.62807
255	1.27216	1.38351	2.76925	2.56344
256	1.23596	1.33058	2.76717	2.57328
257	1.19982	1.2852	2.759	2.56012
258	1.16585	1.24257	2.77241	2.5588
259	1.13327	1.20382	2.75605	2.58206
260	1.09848	1.16516	2.76123	2.5418
261	1.06349	1.12645	2.71799	2.50819
262	1.02841	1.08744	2.69316	2.51353
263	0.994367	1.05207	2.6885	2.52041
264	0.962561	1.01776	2.70576	2.50095
265	0.930529	0.986262	2.64956	2.50557
266	0.899182	0.955069	2.68036	2.49266
267	0.869453	0.925351	2.70242	2.44729
268	0.841022	0.897671	2.63761	2.43473
269	0.812316	0.870674	2.63476	2.41064
270	0.784175	0.845776	2.64386	2.43107
271	0.75731	0.821568	2.60687	2.41803
272	0.726731	0.795496	2.57552	2.40556
273	0.694317	0.767317	2.62839	2.41168
274	0.660343	0.735461	2.58436	2.41311
275	0.625287	0.702109	2.53659	2.37895
276	0.591816	0.668394	2.57786	2.3799
277	0.556726	0.633148	2.54447	2.37671
278	0.520482	0.597713	2.55257	2.36616
279	0.484231	0.562411	2.54321	2.37231
280	0.447181	0.527689	2.52503	2.3727
281	0.411231	0.494598	2.56851	2.36976
282	0.377706	0.462112	2.55826	2.37511
283	0.342878	0.42657	2.54571	2.35899
284	0.306182	0.388592	2.54161	2.36821
285	0.268459	0.349366	2.51926	2.34995
286	0.231642	0.312574	2.49943	2.35143
287	0.199907	0.280158	2.49535	2.34144
288	0.171906	0.249667	2.50895	2.31444
289	0.147013	0.222416	2.51333	2.32157
290	0.124121	0.198624	2.48908	2.33081
291	0.103934	0.179294	2.48035	2.32943
292	0.086982	0.163329	2.47132	2.32845
293	0.073336	0.149004	2.50036	2.29688
294	0.062041	0.13489	2.45162	2.31749
295	0.051489	0.120636	2.4433	2.30953
296	0.042722	0.107908	2.44768	2.32138
297	0.036021	0.09773	2.42589	2.28083
298	0.030639	0.089851	2.34577	2.29543
299	0.026955	0.08429	2.05199	2.24536
300	0.024236	0.079667	1.53867	2.03825
301	0.02213	0.075428	1.07222	1.60002
302	0.020963	0.071879	0.73024	1.1395
303	0.020538	0.069106	0.497927	0.789564
304	0.019979	0.066651	0.356546	0.556916
305	0.019943	0.064844	0.270153	0.40768
306	0.020236	0.063362	0.216628	0.312364
307	0.020418	0.061634	0.182453	0.247627
308	0.021015	0.060555	0.160442	0.205539
309	0.021766	0.059432	0.146913	0.178655
310	0.022509	0.05843	0.139214	0.16118
311	0.023132	0.057896	0.135512	0.151364
312	0.023996	0.057614	0.134161	0.146467
313	0.024704	0.057169	0.135132	0.144988
314	0.025284	0.057105	0.136914	0.145746
315	0.025903	0.057017	0.139608	0.147024
316	0.026603	0.057537	0.142092	0.148682
317	0.026976	0.057433	0.144785	0.150617
318	0.02759	0.057445	0.146784	0.151949
319	0.0284	0.057666	0.148348	0.153556
320	0.028772	0.057413	0.150284	0.154935
321	0.029315	0.057011	0.151957	0.156204
322	0.029577	0.056526	0.15309	0.157571
323	0.029778	0.055709	0.153695	0.157975
324	0.029814	0.054975	0.154264	0.158426
325	0.029828	0.054475	0.15393	0.158147
326	0.029831	0.054144	0.153476	0.157707
327	0.02939	0.053576	0.152254	0.156484
328	0.028988	0.05316	0.150211	0.15475
329	0.028639	0.052741	0.148067	0.152791
330	0.028195	0.051844	0.145602	0.150278
331	0.027934	0.050903	0.142748	0.148054
332	0.026942	0.049705	0.139426	0.144547
333	0.026129	0.049204	0.135827	0.14115
334	0.025017	0.048267	0.131458	0.137001
335	0.024231	0.046232	0.126287	0.132038
336	0.023489	0.043512	0.121355	0.127075
337	0.022235	0.040507	0.116306	0.122157
338	0.021195	0.038559	0.110929	0.117137
339	0.020245	0.036889	0.106227	0.112353
340	0.018583	0.033869	0.097975	0.103378
341	0.017611	0.032134	0.093778	0.099597
342	0.016145	0.030815	0.089251	0.095283
343	0.01586	0.029421	0.084981	0.091468
344	0.014739	0.028077	0.080408	0.086801
345	0.012885	0.02692	0.075101	0.082729
346	0.012432	0.025831	0.071812	0.079165
347	0.011213	0.024829	0.067413	0.074743
348	0.010857	0.02412	0.064611	0.072266
349	0.011183	0.022323	0.060992	0.069865
350	0.010236	0.020863	0.058519	0.067571
351	0.0095	0.019947	0.056073	0.064823
352	0.008428	0.01827	0.053642	0.062706
353	0.008397	0.017282	0.051488	0.060972
354	0.008141	0.016174	0.04956	0.059646
355	0.008694	0.016093	0.04977	0.057705
356	0.007436	0.015634	0.047506	0.056244
357	0.006904	0.014294	0.046164	0.054899
358	0.007937	0.014018	0.045509	0.053982
359	0.007613	0.01375	0.045421	0.054287
360	0.007776	0.013028	0.044787	0.053833
361	0.007697	0.012421	0.045622	0.054634
362	0.008196	0.012283	0.045884	0.054799
363	0.00754	0.01179	0.047165	0.055892
364	0.007577	0.011505	0.047273	0.056427
365	0.008449	0.01159	0.048469	0.057646
366	0.008881	0.011812	0.049966	0.05916
367	0.008964	0.011961	0.051224	0.060332
368	0.009208	0.012442	0.053534	0.062961
369	0.010379	0.013155	0.056555	0.065934
370	0.009888	0.01268	0.059035	0.068574
371	0.010668	0.014111	0.06216	0.071902
372	0.011386	0.014708	0.064463	0.074062
373	0.01137	0.014966	0.066549	0.075891
374	0.01208	0.015962	0.068913	0.077852
375	0.012445	0.015858	0.0712	0.079541
376	0.013065	0.016327	0.073116	0.081212
377	0.013999	0.016527	0.07555	0.082979
378	0.014572	0.01662	0.077982	0.085209
379	0.015165	0.016849	0.080935	0.087486
380	0.015809	0.017335	0.084034	0.090227
381	0.016321	0.017618	0.087558	0.093474
382	0.017006	0.018027	0.091115	0.097041
383	0.017855	0.018355	0.094637	0.100592
384	0.018479	0.01894	0.09868	0.104332
385	0.01932	0.019667	0.102876	0.108402
386	0.020112	0.020188	0.106642	0.112121
387	0.021048	0.021282	0.110913	0.116398
388	0.021602	0.021674	0.114817	0.12037
389	0.022444	0.022187	0.119139	0.124485
390	0.023197	0.022889	0.123045	0.128497
391	0.024088	0.023554	0.127127	0.132244
392	0.024796	0.024268	0.131186	0.136628
393	0.025756	0.025096	0.135937	0.141032
394	0.026655	0.025863	0.14043	0.145489
395	0.027514	0.026516	0.144707	0.149533
396	0.028395	0.027172	0.148524	0.152831
397	0.029288	0.027869	0.152065	0.155902
398	0.030082	0.028501	0.155402	0.158991
399	0.031139	0.029363	0.158627	0.161546
400	0.032007	0.03029	0.161771	0.164204
401	0.032598	0.030692	0.165168	0.166825
402	0.033467	0.03142	0.167942	0.169253
403	0.033998	0.03199	0.171019	0.172029
404	0.034673	0.032663	0.174593	0.175427
405	0.035618	0.033723	0.178494	0.179029
406	0.036317	0.034021	0.182414	0.182394
407	0.037161	0.034965	0.185728	0.185881
408	0.037867	0.03546	0.188874	0.188751
409	0.038541	0.036014	0.192071	0.19197
410	0.039112	0.036645	0.195516	0.194965
411	0.039821	0.037227	0.19841	0.19823
412	0.040142	0.037227	0.201323	0.201024
413	0.040715	0.037835	0.203669	0.20335
414	0.041259	0.038475	0.206233	0.205796
415	0.041668	0.038837	0.208507	0.208172
416	0.042489	0.039373	0.211316	0.210689
417	0.042902	0.039838	0.213899	0.213409
418	0.043296	0.040133	0.216214	0.215739
419	0.043657	0.040519	0.218212	0.217614
420	0.04415	0.041165	0.219961	0.219427
421	0.044533	0.041347	0.221758	0.221265
422	0.044745	0.041479	0.22333	0.222859
423	0.045206	0.041786	0.224956	0.224347
424	0.045425	0.042149	0.226425	0.22587
425	0.045519	0.042161	0.227491	0.227172
426	0.045984	0.042582	0.22886	0.228322
427	0.046114	0.042682	0.229949	0.229227
428	0.046314	0.042943	0.230923	0.230169
429	0.046423	0.042971	0.231714	0.23115
430	0.046654	0.043192	0.232424	0.231835
431	0.046751	0.043276	0.233136	0.232427
432	0.046895	0.043259	0.23385	0.233044
433	0.046912	0.04342	0.234299	0.233492
434	0.047222	0.043441	0.234671	0.233752
435	0.046998	0.043311	0.234867	0.234108
436	0.047158	0.043404	0.234953	0.234295
437	0.046928	0.043388	0.234946	0.234234
438	0.046986	0.043363	0.234777	0.234062
439	0.047204	0.043335	0.234794	0.234112
440	0.047114	0.043385	0.234506	0.233655
441	0.046918	0.043095	0.234045	0.233227
442	0.046807	0.043106	0.233539	0.23288
443	0.046689	0.043096	0.233163	0.232443
444	0.046696	0.042851	0.232476	0.231539
445	0.046465	0.042711	0.231547	0.230858
446	0.046364	0.04273	0.230835	0.229852
447	0.046037	0.04244	0.229815	0.228966
448	0.045931	0.041966	0.228786	0.228009
449	0.04573	0.041928	0.22794	0.226822
450	0.045557	0.041845	0.226607	0.225819
451	0.045143	0.041355	0.225078	0.224277
452	0.044839	0.041326	0.223651	0.222728
453	0.044264	0.040832	0.222071	0.221459
454	0.044102	0.040494	0.220429	0.219534
455	0.043761	0.040144	0.21839	0.217507
456	0.043543	0.0399	0.216548	0.215858
457	0.042938	0.039528	0.214472	0.213759
458	0.042583	0.039186	0.212449	0.211734
459	0.042244	0.038923	0.210266	0.209647
460	0.041853	0.038499	0.208024	0.207362
461	0.041305	0.037904	0.205697	0.205178
462	0.04084	0.037519	0.203521	0.202969
463	0.0404	0.037184	0.201084	0.200472
464	0.039687	0.036446	0.198096	0.197694
465	0.039185	0.036038	0.195208	0.194684
466	0.038511	0.03548	0.191964	0.191539
467	0.037907	0.034894	0.188914	0.188485
468	0.037428	0.034347	0.185949	0.185475
469	0.036794	0.03367	0.182511	0.182367
470	0.036146	0.033128	0.179451	0.179036
471	0.035478	0.03276	0.17615	0.175833
472	0.034762	0.032073	0.172768	0.172474
473	0.033966	0.031399	0.169544	0.169262
474	0.03339	0.030791	0.166323	0.166507
475	0.03286	0.030308	0.16303	0.162722
476	0.03199	0.029365	0.159163	0.158832
477	0.031267	0.028864	0.154967	0.15485
478	0.030309	0.027952	0.151075	0.150946
479	0.029613	0.027257	0.14742	0.147159
480	0.028908	0.026811	0.143619	0.143637
481	0.028206	0.026039	0.139738	0.139757
482	0.027547	0.02547	0.135846	0.135962
483	0.026595	0.02467	0.132242	0.132208
484	0.025699	0.023866	0.128421	0.128492
485	0.025138	0.023492	0.125003	0.124764
486	0.02427	0.022552	0.121171	0.12135
487	0.023587	0.021993	0.117352	0.117517
488	0.022808	0.021302	0.113431	0.11379
489	0.022286	0.020653	0.109786	0.109826
490	0.021101	0.019796	0.105777	0.105991
491	0.020547	0.019212	0.10219	0.10238
492	0.020013	0.018912	0.098497	0.098689
493	0.019224	0.018272	0.094983	0.095266
494	0.018494	0.017626	0.091348	0.091597
495	0.017595	0.016848	0.088035	0.088423
496	0.017267	0.016323	0.084499	0.084892
497	0.016469	0.015749	0.081409	0.081759
498	0.015938	0.015309	0.078309	0.078835
499	0.015173	0.014574	0.07518	0.075548
500	0.014603	0.014227	0.071989	0.072482
501	0.014021	0.01362	0.06885	0.069538
502	0.013493	0.012978	0.065948	0.066374
503	0.012724	0.012427	0.062879	0.063451
504	0.012046	0.011939	0.060131	0.060628
505	0.011659	0.011504	0.057375	0.057957
506	0.0112	0.010991	0.05489	0.055335
507	0.010654	0.010619	0.052194	0.052858
508	0.010087	0.010214	0.049759	0.050313
509	0.009664	0.009855	0.047486	0.048031
510	0.009332	0.009426	0.04542	0.045967
511	0.008936	0.009054	0.043443	0.043943
512	0.00854	0.008624	0.041347	0.041842
513	0.008151	0.008379	0.039134	0.039715
514	0.007644	0.007913	0.037045	0.037661
515	0.00712	0.007554	0.035173	0.035751
516	0.006843	0.007229	0.033167	0.033934
517	0.006447	0.006852	0.031497	0.032042
518	0.006117	0.006621	0.029796	0.03051
519	0.005927	0.006389	0.028314	0.028908
520	0.005459	0.005991	0.026856	0.027692
521	0.005183	0.005774	0.025538	0.026249
522	0.005029	0.005586	0.024437	0.025102
523	0.004671	0.005327	0.023154	0.023888
524	0.004428	0.005083	0.021884	0.022465
525	0.004256	0.004953	0.020518	0.021202
526	0.00406	0.004889	0.019408	0.020211
527	0.00377	0.00449	0.018298	0.01921
528	0.003425	0.004239	0.017297	0.01804
529	0.003317	0.003944	0.016362	0.017119
530	0.003	0.003877	0.015617	0.016276
531	0.002943	0.003766	0.014842	0.015431
532	0.002921	0.003744	0.014082	0.014779
533	0.002717	0.003639	0.013492	0.014117
534	0.002467	0.0034	0.012918	0.013572
535	0.002429	0.003372	0.012357	0.012946
536	0.002445	0.003238	0.011663	0.012255
537	0.002282	0.003194	0.010897	0.011623
538	0.002057	0.002957	0.010346	0.011092
539	0.001945	0.002922	0.00996	0.01061
540	0.001923	0.002881	0.009427	0.010078
541	0.001883	0.002782	0.009063	0.009661
542	0.001603	0.002615	0.008624	0.009306
543	0.00153	0.002537	0.008312	0.008967
544	0.001445	0.002538	0.00789	0.008592
545	0.001469	0.002519	0.007596	0.008248
546	0.001379	0.002386	0.007262	0.007926
547	0.001301	0.002382	0.007013	0.007701
548	0.001276	0.002341	0.006661	0.007505
549	0.001245	0.002247	0.006466	0.007198
550	0.00124	0.002215	0.006151	0.006874
551	0.00112	0.002106	0.005986	0.006627
552	0.001272	0.002066	0.005714	0.006381
553	0.001005	0.00204	0.005664	0.006259
554	0.000992	0.001918	0.005474	0.006153
555	0.00097	0.001938	0.005311	0.005933
556	0.000996	0.001954	0.005183	0.005807
557	0.001082	0.002112	0.005059	0.005656
558	0.000819	0.001918	0.004989	0.005566
559	0.000757	0.001908	0.004868	0.00543
560	0.00079	0.001845	0.004769	0.005355
561	0.000867	0.001956	0.004629	0.00521
562	0.000745	0.001826	0.00448	0.005019
563	0.000792	0.00185	0.004439	0.00509
564	0.000735	0.001774	0.004315	0.004989
565	0.000699	0.001824	0.004204	0.004864
566	0.000646	0.001733	0.004191	0.004724
567	0.00059	0.001685	0.004079	0.00472
568	0.000602	0.001661	0.003965	0.004568
569	0.000535	0.001752	0.003857	0.004478
570	0.000614	0.001657	0.00383	0.004496
571	0.000658	0.001699	0.003841	0.004494
572	0.000518	0.001775	0.00381	0.004479
573	0.000593	0.001605	0.003791	0.004401
574	0.000571	0.001807	0.003783	0.004338
575	0.000586	0.001565	0.003668	0.004355
576	0.000407	0.001608	0.003595	0.004257
577	0.000483	0.001712	0.003428	0.004153
578	0.000392	0.001572	0.003428	0.004068
579	0.00051	0.001719	0.00341	0.004145
580	0.000477	0.00165	0.003549	0.004175
581	0.000452	0.001665	0.003538	0.004058
582	0.00051	0.001659	0.003559	0.003996
583	0.000434	0.001494	0.003455	0.004054
584	0.000477	0.001689	0.003391	0.003982
585	0.000571	0.001712	0.003354	0.003972
586	0.000414	0.001796	0.003573	0.004048
587	0.000525	0.001837	0.003499	0.003972
588	0.000511	0.001748	0.003512	0.004019
589	0.00047	0.001676	0.003501	0.004045
590	0.000471	0.001914	0.003363	0.003932
591	0.000374	0.001774	0.003299	0.003899
592	0.000383	0.001645	0.003307	0.00383
593	0.000618	0.001857	0.003278	0.003938
594	0.000575	0.001901	0.003291	0.003909
595	0.000459	0.001933	0.003237	0.003822
596	0.000422	0.001779	0.003311	0.003825
597	0.000382	0.001803	0.003209	0.003778
598	0.000423	0.001813	0.00325	0.003786
599	0.000375	0.001629	0.003132	0.003739
600	0.000468	0.001722	0.003143	0.003674
601	0.000354	0.001647	0.003173	0.003743
602	0.000205	0.001597	0.003213	0.003693
603	0.000391	0.001714	0.003237	0.003714
604	0.000273	0.001685	0.003216	0.003671
605	0.000505	0.001773	0.003162	0.003625
606	0.00037	0.001818	0.003096	0.003611
607	0.000437	0.001809	0.00324	0.003666
608	0.000378	0.001631	0.003274	0.003636
609	0.000155	0.001538	0.003296	0.003614
610	0.000189	0.001737	0.003201	0.003731
611	0.000402	0.001769	0.003125	0.003677
612	0.00032	0.001714	0.003249	0.003641
613	0.000404	0.001705	0.003062	0.003523
614	0.000308	0.00174	0.003014	0.003488
615	0.000254	0.001712	0.00298	0.003423
616	0.00037	0.001786	0.002967	0.003496
617	0.00034	0.001802	0.002975	0.003439
618	0.00045	0.001741	0.002971	0.003534
619	0.000237	0.00165	0.002939	0.003425
620	0.000153	0.001787	0.003012	0.00354
621	0.000331	0.001655	0.002878	0.00333
622	0.00024	0.001748	0.003053	0.003468
623	0.000235	0.001523	0.00288	0.003401
624	0.000262	0.001514	0.002886	0.003388
625	0.000248	0.001466	0.002852	0.003361
626	0.000376	0.001752	0.002891	0.003405
627	0.00025	0.001592	0.002781	0.003348
628	0.000126	0.001438	0.002887	0.003402
629	9.9e-05	0.001457	0.002764	0.003267
630	0.000197	0.001659	0.002726	0.003165
631	0.000119	0.001669	0.002745	0.003223
632	0.000137	0.001502	0.002752	0.00326
633	0.000197	0.001588	0.002843	0.003237
634	0.000206	0.001694	0.002899	0.003388
635	0.000227	0.001694	0.002901	0.003396
636	0.000239	0.001467	0.002778	0.003321
637	0.000246	0.001557	0.002736	0.003203
638	0.00034	0.001762	0.002671	0.003159
639	0.000257	0.00163	0.00271	0.003092
640	0.000226	0.001629	0.002793	0.003205
641	0.000271	0.00173	0.002535	0.003053
642	0.00019	0.001512	0.002667	0.003234
643	0.000123	0.001606	0.002764	0.00317
644	0.000265	0.001686	0.002576	0.003133
645	0.000293	0.001741	0.002631	0.003094
646	0.000152	0.001518	0.002635	0.003119
647	6.7e-05	0.001526	0.002669	0.003218
648	0.000211	0.001579	0.002647	0.003138
649	0.000228	0.001792	0.002668	0.003128
650	5.8e-05	0.001592	0.002652	0.003143
651	0.000245	0.001616	0.002575	0.003021
652	0.000172	0.001694	0.002605	0.0029
653	8.5e-05	0.001608	0.002611	0.002994
654	0.000141	0.001756	0.002496	0.002921
655	0.000166	0.001691	0.002575	0.002928
656	0.000223	0.001712	0.002464	0.002935
657	0.00016	0.001684	0.002581	0.003038
658	0.000239	0.001689	0.002525	0.002977
659	0.00014	0.001654	0.002492	0.002931
660	0.000107	0.001582	0.002584	0.003026
661	0.000183	0.001681	0.002643	0.003049
662	0.000116	0.001561	0.002572	0.002957
663	0.00019	0.001594	0.002496	0.002962
664	9.5e-05	0.001453	0.002563	0.002948
665	9.2e-05	0.001424	0.002618	0.003069
666	-7.1e-05	0.001582	0.002633	0.002983
667	9.3e-05	0.001674	0.002518	0.0028
668	0.00024	0.001696	0.0025	0.002854
669	8e-05	0.001686	0.002343	0.00283
670	0.000107	0.001485	0.002381	0.002841
671	8.8e-05	0.001419	0.002454	0.002828
672	0.00014	0.001573	0.002503	0.002933
673	9.8e-05	0.001453	0.002496	0.002896
674	-2.1e-05	0.001527	0.002464	0.0029
675	4.7e-05	0.00155	0.002324	0.002666
676	-2.7e-05	0.001566	0.00235	0.002729
677	7.1e-05	0.001553	0.002259	0.002665
678	6.3e-05	0.001454	0.002323	0.002671
679	0.000161	0.001512	0.002364	0.002772
680	5.2e-05	0.001468	0.002207	0.002636
681	-1.8e-05	0.00154	0.002283	0.002644
682	-5.6e-05	0.001393	0.002292	0.002611
683	7.3e-05	0.001472	0.002199	0.002624
684	3.1e-05	0.001529	0.00228	0.002732
685	5.2e-05	0.001434	0.002306	0.002708
686	3.6e-05	0.00144	0.002166	0.00261
687	4.6e-05	0.001468	0.002259	0.002636
688	5e-05	0.001597	0.0021	0.002412
689	5.6e-05	0.001564	0.002155	0.002481
690	-2.4e-05	0.001575	0.002278	0.002643
691	-9.2e-05	0.00145	0.002287	0.002593
692	2.5e-05	0.001523	0.002243	0.002631
693	7.3e-05	0.001443	0.002232	0.002667
694	4.6e-05	0.001435	0.002245	0.002713
695	-3.2e-05	0.001473	0.002222	0.002697
696	1.1e-05	0.001401	0.002232	0.002553
697	7.5e-05	0.001503	0.002198	0.002527
698	3.3e-05	0.001308	0.002083	0.002419
699	5e-06	0.001484	0.002182	0.002501
700	-2.3e-05	0.001437	0.002051	0.002508
701	-4.4e-05	0.001524	0.002143	0.002575
702	-4.8e-05	0.001468	0.002135	0.002556
703	2.6e-05	0.001479	0.002277	0.002623
704	-3.1e-05	0.001517	0.002231	0.00254
705	-4.5e-05	0.00145	0.002235	0.002447
706	-6.7e-05	0.001473	0.002245	0.0025
707	7.3e-05	0.001419	0.002186	0.002496
708	-4.1e-05	0.001513	0.002092	0.002431
709	-8.4e-05	0.001431	0.002133	0.002466
710	-8.7e-05	0.001315	0.002038	0.002375
711	-9.8e-05	0.001429	0.002202	0.002567
712	-7.6e-05	0.001416	0.002157	0.002507
713	-4.8e-05	0.001471	0.001946	0.002376
714	-0.000164	0.001346	0.00205	0.002378
715	-0.000108	0.001346	0.002067	0.002431
716	-0.000189	0.00139	0.002174	0.002523
717	-0.000231	0.001293	0.002043	0.002439
718	-0.000108	0.001529	0.00212	0.002466
719	-4.1e-05	0.001526	0.002036	0.002408
720	-0.000168	0.001456	0.002087	0.002533
721	-5.7e-05	0.001413	0.00199	0.002445
722	-0.000174	0.001286	0.001946	0.002366
723	-0.00011	0.00132	0.002039	0.002412
724	-3e-05	0.001445	0.001986	0.002401
725	-8.7e-05	0.001379	0.00193	0.002364
726	-9.3e-05	0.001381	0.00192	0.002326
727	-7.3e-05	0.001468	0.001931	0.002325
728	-0.000101	0.001425	0.00194	0.002308
729	-0.000174	0.001283	0.001976	0.002302
730	-0.000134	0.001375	0.001994	0.002257
731	-0.000149	0.00144	0.002027	0.002328
732	-0.000252	0.001389	0.001909	0.002168
733	-0.000305	0.001396	0.001956	0.002238
734	-0.0002	0.00139	0.001938	0.002304
735	-0.000229	0.001407	0.001994	0.002422
736	-0.000251	0.001379	0.001911	0.002396
737	-0.000257	0.001272	0.001926	0.00228
738	-0.0002	0.001433	0.001894	0.002237
739	-0.000254	0.001295	0.001878	0.002178
740	-0.000204	0.001426	0.00195	0.002281
741	-0.000168	0.001404	0.001887	0.002294
742	-0.000335	0.001318	0.001816	0.002232
743	-0.000278	0.001463	0.001862	0.002282
744	-0.000231	0.001384	0.001867	0.002191
745	-0.000259	0.001343	0.001847	0.002218
746	-0.000269	0.001329	0.00176	0.00215
747	-0.00027	0.001369	0.001892	0.002261
748	-0.000232	0.001403	0.001785	0.002259
749	-0.000363	0.001255	0.001764	0.00213
750	-0.00028	0.0013	0.001836	0.002161
751	-0.000335	0.001199	0.001799	0.002269
752	-0.000225	0.001364	0.001729	0.002272
753	-0.000114	0.001357	0.00176	0.00209
754	-0.000173	0.00144	0.001692	0.002169
755	-0.000311	0.001361	0.001726	0.002118
756	-0.000187	0.001305	0.001693	0.002215
757	-0.000232	0.001233	0.001723	0.002183
758	-0.000245	0.001322	0.001628	0.002091
759	-0.000292	0.001167	0.001709	0.00209
760	-0.000114	0.001472	0.001711	0.00204
761	-0.000346	0.001244	0.001715	0.002104
762	-0.000357	0.001265	0.001679	0.002128
763	-0.000235	0.001305	0.00173	0.002117
764	-0.000385	0.001323	0.001713	0.002107
765	-0.000321	0.001279	0.001653	0.002127
766	-0.000228	0.001335	0.001757	0.002152
767	-0.000387	0.001218	0.00176	0.002239
768	-0.000149	0.001335	0.001739	0.002145
769	-0.00027	0.00121	0.001619	0.002162
770	-0.000381	0.001304	0.001617	0.002202
771	-0.000258	0.001242	0.001678	0.002112
772	-0.000287	0.001204	0.001714	0.00221
773	-0.000333	0.001251	0.001779	0.002174
774	-0.000329	0.00114	0.001677	0.002129
775	-0.000229	0.001317	0.001729	0.0022
776	-0.000308	0.001211	0.001623	0.002156
777	-0.000309	0.001245	0.001582	0.002144
778	-0.000266	0.00121	0.001558	0.002235
779	-0.000273	0.001217	0.001472	0.002107
780	-0.000276	0.001236	0.001606	0.002196
781	-0.000255	0.001204	0.001624	0.002148
782	-0.000378	0.001158	0.001527	0.002102
783	-0.000292	0.001229	0.001617	0.002242
784	-0.000412	0.001209	0.001619	0.002204
785	-0.000216	0.001366	0.001703	0.002393
786	-0.000399	0.001153	0.001577	0.002179
787	-0.000235	0.001304	0.001551	0.002222
788	-0.000279	0.001071	0.001721	0.00229
789	-0.000185	0.001311	0.001496	0.002084
790	-0.00046	0.001146	0.001489	0.002113
791	-0.000305	0.00128	0.001578	0.002154
792	-0.000379	0.001257	0.001561	0.002254
793	-0.000377	0.001241	0.001657	0.002292
794	-0.000207	0.001211	0.00146	0.002186
795	0.000977	0.00125	0.001564	0.002142
796	-0.00023	0.001141	0.001687	0.002325
797	-0.000374	0.001188	0.001528	0.002172
798	-0.00048	0.001291	0.001503	0.002134
799	-0.000484	0.001304	0.00139	0.00218
800	-0.000433	0.00123	0.001438	0.002255

## Sheet: Figure 3 (c)
Sample Name	n-heptane-FC100-BC	n-heptane-FC100-AC	n-heptane-FC500-BC	n-heptane-FC500-AC
Wave Length (nm)	Absorbance	Absorbance	Absorbance	Absorbance
195	0.292795	0.43585	0.03962	0.50321
196	0.428985	0.57564	0.03955	0.6135
197	0.592651	0.71684	0.03939	0.73735
198	0.705131	0.83019	0.03926	0.82954
199	0.835061	0.94252	0.03921	0.93189
200	0.944411	1.04243	0.03894	0.99622
201	1.05038	1.1503	0.0388	1.0868
202	1.14261	1.21794	0.03867	1.17189
203	1.21331	1.28701	0.03872	1.25953
204	1.28061	1.35911	0.03846	1.34496
205	1.36412	1.40189	0.03838	1.42891
206	1.43785	1.46151	0.03821	1.52917
207	1.47484	1.53163	0.03807	1.58259
208	1.54449	1.58904	0.03809	1.66618
209	1.59427	1.62458	0.0378	1.73154
210	1.64853	1.68141	0.0378	1.78339
211	1.70807	1.74317	0.03759	1.80875
212	1.7478	1.82569	0.03739	1.88073
213	1.83334	1.87669	0.03735	1.92384
214	1.92439	1.93994	0.03715	1.96128
215	1.97475	1.99931	0.03717	1.99135
216	2.01209	2.06891	0.03693	2.02387
217	2.05421	2.10839	0.03685	2.05786
218	2.10323	2.16807	0.03682	2.14921
219	2.15814	2.19084	0.03673	2.16386
220	2.18296	2.20467	0.03671	2.16764
221	2.23297	2.2391	0.03662	2.18731
222	2.24629	2.2702	0.03646	2.2026
223	2.27008	2.28403	0.03648	2.20741
224	2.28464	2.30933	0.0362	2.24449
225	2.31492	2.34664	0.0361	2.24532
226	2.32597	2.35637	0.03597	2.22392
227	2.36245	2.39383	0.03593	2.27469
228	2.38654	2.39933	0.03593	2.28079
229	2.39624	2.39811	0.0358	2.29244
230	2.40628	2.43311	0.0357	2.31572
231	2.44721	2.42909	0.03566	2.31447
232	2.43227	2.44271	0.03538	2.35641
233	2.45676	2.43517	0.03541	2.3658
234	2.43134	2.44404	0.03527	2.35176
235	2.45274	2.45252	0.03517	2.35739
236	2.43628	2.43997	2.67278	2.3524
237	2.41626	2.42376	2.66113	2.36793
238	2.39574	2.41634	2.70765	2.38032
239	2.37423	2.38878	2.64753	2.35851
240	2.33895	2.36991	2.63386	2.37646
241	2.30851	2.33721	2.67963	2.36508
242	2.26344	2.30294	2.6866	2.34398
243	2.22624	2.28085	2.67941	2.34118
244	2.18413	2.23876	2.65137	2.35955
245	2.14718	2.21676	2.62245	2.35223
246	2.10597	2.18459	2.6305	2.34764
247	2.07794	2.16444	2.65703	2.34077
248	2.03904	2.13274	2.66591	2.33424
249	2.01959	2.12278	2.6396	2.35333
250	1.99537	2.11213	2.6217	2.35847
251	1.98741	2.09857	2.66553	2.32104
252	1.97921	2.0868	2.65896	2.30801
253	1.98073	2.0881	2.65278	2.3389
254	1.9827	2.09258	2.65593	2.33706
255	2.00398	2.09962	2.60099	2.31877
256	2.01266	2.0972	2.62597	2.31455
257	2.03112	2.11884	2.61126	2.29373
258	2.05706	2.13119	2.57749	2.26737
259	2.07491	2.15107	2.56506	2.27347
260	2.10885	2.15084	2.57423	2.26865
261	2.12303	2.17312	2.54814	2.21622
262	2.14005	2.1795	2.52481	2.24337
263	2.14518	2.19049	2.52129	2.1966
264	2.14957	2.19015	2.52163	2.18234
265	2.16673	2.1813	2.52684	2.16906
266	2.17149	2.17684	2.52744	2.16547
267	2.17883	2.17334	2.48387	2.17034
268	2.16139	2.15337	2.47603	2.15786
269	2.15465	2.15051	2.44566	2.15619
270	2.13914	2.131	2.45672	2.14054
271	2.11191	2.11559	2.44287	2.13754
272	2.08156	2.077	2.44928	2.13384
273	2.05019	2.038	2.40769	2.11731
274	2.0146	1.97971	2.42576	2.12246
275	1.95884	1.92474	2.41065	2.11831
276	1.86847	1.85059	2.43052	2.10981
277	1.78632	1.74808	2.39363	2.1243
278	1.68655	1.64904	2.43662	2.11206
279	1.56867	1.53247	2.46215	2.10213
280	1.44464	1.41787	2.44704	2.10093
281	1.32038	1.30687	2.45157	2.10069
282	1.20288	1.19473	2.37662	2.10113
283	1.08507	1.07611	2.39213	2.10051
284	0.964296	0.95807	2.38316	2.09731
285	0.844701	0.85067	2.36444	2.0659
286	0.734922	0.76038	2.34813	2.06062
287	0.645446	0.68552	2.37107	2.09356
288	0.571945	0.62093	2.37482	2.09123
289	0.510401	0.56567	2.35691	2.08082
290	0.457404	0.52218	2.35343	2.09475
291	0.413616	0.48742	2.37296	2.0898
292	0.380375	0.46068	2.36627	2.08934
293	0.356005	0.43828	2.36177	2.07677
294	0.337949	0.41946	2.38681	2.092
295	0.324398	0.40473	2.36158	2.10543
296	0.31594	0.39636	2.38723	2.08561
297	0.312785	0.3917	2.36791	2.08649
298	0.31392	0.39086	2.40349	2.07786
299	0.317857	0.39255	2.39886	2.09605
300	0.323882	0.39561	2.33797	2.07108
301	0.331342	0.40051	2.25904	2.04097
302	0.340895	0.40662	2.16297	1.94176
303	0.352087	0.41362	2.08679	1.8615
304	0.363658	0.42134	2.05394	1.79699
305	0.375852	0.42943	2.05246	1.76427
306	0.389077	0.43799	2.06982	1.74981
307	0.402378	0.44716	2.07418	1.7488
308	0.416394	0.45668	2.09796	1.77332
309	0.430329	0.4662	2.119	1.77808
310	0.444118	0.47461	2.13468	1.80591
311	0.45699	0.48356	2.15448	1.82295
312	0.469375	0.49212	2.16876	1.82853
313	0.48089	0.50051	2.18883	1.85737
314	0.491747	0.50786	2.20835	1.86776
315	0.501989	0.51483	2.20876	1.88445
316	0.510812	0.52008	2.22196	1.89807
317	0.518878	0.52514	2.23039	1.88772
318	0.525083	0.52812	2.2106	1.88206
319	0.529907	0.53037	2.22934	1.88613
320	0.534418	0.53105	2.22099	1.92098
321	0.536919	0.53029	2.1913	1.91222
322	0.538094	0.52851	2.19595	1.89322
323	0.537816	0.52633	2.21038	1.89272
324	0.536197	0.52288	2.19741	1.88139
325	0.533988	0.5185	2.20275	1.86781
326	0.529841	0.51284	2.18138	1.87173
327	0.52549	0.50686	2.16934	1.86634
328	0.519189	0.50039	2.17636	1.84563
329	0.512605	0.49294	2.17943	1.83073
330	0.505223	0.48534	2.14436	1.8256
331	0.497396	0.47604	2.12855	1.82124
332	0.488484	0.4676	2.14691	1.78833
333	0.478427	0.45779	2.13486	1.77624
334	0.467733	0.4472	2.10101	1.76451
335	0.457362	0.43566	2.08211	1.74181
336	0.446452	0.42439	2.07115	1.73048
337	0.435714	0.41295	2.02756	1.69304
338	0.424546	0.40186	2.01708	1.67801
339	0.413858	0.37074	1.99747	1.64223
340	0.379191	0.35963	1.72815	1.64223
341	0.368286	0.35032	1.70707	1.64344
342	0.357677	0.34067	1.68278	1.63441
343	0.348295	0.33086	1.68645	1.61224
344	0.337631	0.3201	1.68623	1.59952
345	0.326832	0.31181	1.64963	1.57004
346	0.317841	0.30342	1.6306	1.56023
347	0.309521	0.29716	1.61461	1.54376
348	0.302072	0.29073	1.60249	1.5194
349	0.295775	0.28515	1.58865	1.50416
350	0.288398	0.2787	1.56949	1.47459
351	0.283677	0.27364	1.54946	1.467
352	0.278896	0.26993	1.52588	1.44552
353	0.274003	0.26545	1.526	1.43383
354	0.269587	0.26244	1.50297	1.42268
355	0.266715	0.25813	1.49621	1.40671
356	0.262317	0.25322	1.48905	1.39419
357	0.257505	0.24984	1.47057	1.37906
358	0.254351	0.24572	1.45038	1.36687
359	0.250769	0.24195	1.43416	1.34924
360	0.246866	0.23672	1.41925	1.33226
361	0.24268	0.2316	1.40214	1.3183
362	0.237709	0.22604	1.38177	1.30086
363	0.232313	0.22076	1.35642	1.27778
364	0.22625	0.21435	1.33184	1.2572
365	0.219838	0.20781	1.30551	1.22925
366	0.213472	0.2007	1.28003	1.20349
367	0.205941	0.19332	1.24866	1.17296
368	0.198622	0.18612	1.21375	1.13749
369	0.190336	0.17795	1.17697	1.10157
370	0.181688	0.17028	1.13791	1.0665
371	0.174409	0.16227	1.11774	1.04577
372	0.165825	0.154	1.07516	1.00579
373	0.156912	0.14625	1.03321	0.96783
374	0.148245	0.13727	0.993107	0.92621
375	0.139384	0.12901	0.950296	0.88592
376	0.130437	0.12086	0.907729	0.84662
377	0.122122	0.11294	0.866515	0.80578
378	0.114315	0.10542	0.828774	0.77007
379	0.10693	0.0983	0.791213	0.73401
380	0.099429	0.09147	0.754258	0.69998
381	0.092298	0.08511	0.718614	0.66518
382	0.085576	0.07893	0.684363	0.63263
383	0.078987	0.07339	0.653927	0.60212
384	0.073427	0.06883	0.62388	0.57356
385	0.068628	0.06434	0.597986	0.54842
386	0.064006	0.06086	0.574763	0.52602
387	0.060056	0.05736	0.554193	0.50649
388	0.056668	0.05467	0.537315	0.48987
389	0.053797	0.05239	0.522696	0.47621
390	0.051697	0.05084	0.510797	0.46494
391	0.049768	0.04953	0.500817	0.45618
392	0.048299	0.04856	0.492705	0.44868
393	0.04741	0.04799	0.486302	0.44262
394	0.047092	0.04797	0.482172	0.43831
395	0.047032	0.04822	0.480038	0.43637
396	0.047636	0.04907	0.479635	0.43563
397	0.048506	0.04994	0.480567	0.43665
398	0.049423	0.05123	0.48359	0.43876
399	0.050706	0.05254	0.487152	0.44192
400	0.052167	0.05376	0.492325	0.44648
401	0.053948	0.05555	0.498174	0.45218
402	0.055798	0.05731	0.504339	0.45824
403	0.057604	0.05959	0.511854	0.46537
404	0.060077	0.0623	0.521752	0.47461
405	0.062661	0.06508	0.532541	0.48494
406	0.065757	0.06778	0.544536	0.49673
407	0.06894	0.07053	0.556555	0.50806
408	0.071628	0.0732	0.568281	0.51952
409	0.074534	0.07594	0.580762	0.53168
410	0.077395	0.07896	0.593527	0.54406
411	0.080824	0.08179	0.607063	0.557
412	0.083688	0.08436	0.619799	0.56983
413	0.086445	0.08735	0.632128	0.58157
414	0.089471	0.09006	0.644661	0.59362
415	0.092442	0.09303	0.657643	0.60675
416	0.096024	0.0968	0.67275	0.62177
417	0.099552	0.09984	0.688669	0.63623
418	0.102995	0.10283	0.703322	0.65065
419	0.106219	0.10578	0.716566	0.66421
420	0.109408	0.1089	0.730339	0.67716
421	0.112622	0.11157	0.743452	0.6904
422	0.115583	0.11428	0.757524	0.70365
423	0.11849	0.11717	0.770426	0.71641
424	0.121582	0.1195	0.782972	0.72844
425	0.12408	0.12229	0.794917	0.73991
426	0.12705	0.12482	0.806623	0.75131
427	0.12983	0.12755	0.818786	0.76342
428	0.132655	0.12991	0.830543	0.77516
429	0.135407	0.13242	0.842204	0.78673
430	0.137971	0.13469	0.8534	0.79755
431	0.140406	0.13673	0.863788	0.80741
432	0.142675	0.13876	0.873852	0.81672
433	0.144988	0.14099	0.883539	0.82593
434	0.147189	0.1427	0.892461	0.83479
435	0.149038	0.14438	0.90034	0.84333
436	0.150886	0.14615	0.908691	0.85115
437	0.152676	0.14753	0.915969	0.85784
438	0.154195	0.14889	0.921633	0.86429
439	0.15582	0.15017	0.927981	0.87001
440	0.15723	0.15111	0.933704	0.87567
441	0.158268	0.15225	0.938805	0.88091
442	0.159572	0.15326	0.94328	0.88531
443	0.160709	0.15433	0.947908	0.88913
444	0.161784	0.155	0.951028	0.89255
445	0.162473	0.1558	0.954217	0.89599
446	0.163305	0.15643	0.956115	0.89792
447	0.163902	0.15648	0.958174	0.89978
448	0.164281	0.15688	0.959063	0.90061
449	0.164481	0.15702	0.959155	0.90131
450	0.164838	0.1566	0.959179	0.9015
451	0.164746	0.15672	0.95733	0.90029
452	0.164759	0.15658	0.956736	0.90015
453	0.164698	0.15639	0.955584	0.89906
454	0.164547	0.1562	0.954326	0.89767
455	0.164321	0.15592	0.952072	0.89539
456	0.164132	0.15529	0.949375	0.89274
457	0.163631	0.15492	0.946676	0.8899
458	0.163074	0.1544	0.943286	0.88693
459	0.162475	0.15348	0.939197	0.88289
460	0.16179	0.15262	0.935132	0.87969
461	0.160933	0.15179	0.930704	0.87565
462	0.159976	0.15104	0.926383	0.87125
463	0.159328	0.14968	0.921078	0.8665
464	0.158008	0.14876	0.915174	0.86097
465	0.156902	0.14753	0.908549	0.85491
466	0.155671	0.1462	0.901432	0.848
467	0.154406	0.14521	0.894621	0.84149
468	0.153269	0.14381	0.88784	0.83509
469	0.151687	0.14235	0.879971	0.82767
470	0.150132	0.14086	0.872968	0.8204
471	0.148886	0.13939	0.864372	0.81237
472	0.147179	0.1379	0.856173	0.80528
473	0.145411	0.1363	0.8493	0.79791
474	0.143867	0.13485	0.840828	0.79092
475	0.142187	0.13284	0.832202	0.7823
476	0.14031	0.13097	0.821907	0.77262
477	0.138422	0.12912	0.811661	0.76261
478	0.136186	0.1273	0.801974	0.75309
479	0.134304	0.12545	0.791528	0.74335
480	0.132671	0.12345	0.781506	0.73412
481	0.130679	0.12175	0.771226	0.72433
482	0.128547	0.1196	0.760164	0.71365
483	0.12641	0.11755	0.749372	0.70424
484	0.124368	0.11552	0.739522	0.69376
485	0.122342	0.11346	0.728707	0.68355
486	0.119917	0.1114	0.717816	0.67323
487	0.117749	0.10924	0.706271	0.66242
488	0.115362	0.10694	0.694069	0.6507
489	0.112865	0.10454	0.681952	0.63911
490	0.110509	0.10222	0.669385	0.62735
491	0.108209	0.10045	0.657491	0.61559
492	0.106	0.09802	0.64526	0.60434
493	0.10361	0.09564	0.633071	0.59214
494	0.101027	0.09313	0.620587	0.58048
495	0.098202	0.09096	0.608338	0.56873
496	0.096217	0.08843	0.595708	0.55673
497	0.093478	0.08631	0.583332	0.54535
498	0.091274	0.08412	0.571545	0.53389
499	0.088707	0.08186	0.559373	0.52221
500	0.086231	0.0793	0.546748	0.51022
501	0.083956	0.07695	0.534075	0.49811
502	0.081261	0.07455	0.520988	0.48571
503	0.078521	0.07215	0.50821	0.4733
504	0.076047	0.06978	0.495346	0.46117
505	0.073706	0.06762	0.483095	0.44909
506	0.071372	0.06508	0.470615	0.43747
507	0.068769	0.06303	0.45819	0.42574
508	0.066434	0.06081	0.446267	0.41409
509	0.064108	0.05866	0.434695	0.40295
510	0.061802	0.05675	0.423779	0.39268
511	0.059772	0.05448	0.413169	0.38265
512	0.057357	0.05253	0.40155	0.37147
513	0.054984	0.05014	0.389498	0.36005
514	0.052664	0.04795	0.377546	0.34883
515	0.050459	0.04603	0.366109	0.33755
516	0.048425	0.04398	0.354707	0.32695
517	0.046193	0.04201	0.344108	0.31657
518	0.044081	0.04017	0.333847	0.30659
519	0.04218	0.03824	0.32365	0.29694
520	0.040167	0.03648	0.313949	0.28784
521	0.03832	0.03494	0.304926	0.2791
522	0.036598	0.03322	0.296637	0.2715
523	0.034823	0.03161	0.287916	0.26293
524	0.033017	0.02994	0.278523	0.25429
525	0.031401	0.0282	0.269162	0.24503
526	0.029579	0.02663	0.259592	0.23601
527	0.02785	0.02509	0.251161	0.22778
528	0.026207	0.0236	0.243183	0.22028
529	0.024561	0.02223	0.235644	0.21281
530	0.023106	0.021	0.228419	0.20593
531	0.021832	0.01985	0.22121	0.19933
532	0.020747	0.01864	0.214685	0.19287
533	0.019475	0.01745	0.208628	0.18718
534	0.018156	0.01644	0.202893	0.18166
535	0.017086	0.01539	0.196652	0.17591
536	0.015924	0.01435	0.190276	0.16975
537	0.014873	0.01324	0.183912	0.16361
538	0.013677	0.01239	0.178292	0.15806
539	0.012769	0.01158	0.173163	0.15328
540	0.011889	0.01067	0.168167	0.14851
541	0.010953	0.00973	0.163371	0.14393
542	0.009996	0.00894	0.158823	0.13961
543	0.009317	0.00834	0.154481	0.13552
544	0.008482	0.00779	0.150393	0.13161
545	0.007694	0.00701	0.146663	0.12811
546	0.007105	0.00651	0.14297	0.12466
547	0.006479	0.00573	0.139424	0.12129
548	0.00582	0.00518	0.135726	0.11777
549	0.005161	0.00461	0.132336	0.11463
550	0.004468	0.00405	0.128996	0.11143
551	0.003924	0.00371	0.126016	0.10859
552	0.003495	0.00315	0.123204	0.10588
553	0.002944	0.00273	0.120575	0.10342
554	0.002655	0.00245	0.118046	0.10106
555	0.002215	0.00209	0.115597	0.09876
556	0.001923	0.00188	0.113288	0.09661
557	0.001659	0.00136	0.11111	0.09459
558	0.001199	0.000852	0.109177	0.0929
559	0.000726	0.000713	0.107297	0.09107
560	0.000474	0.000566	0.105348	0.08929
561	0.000268	0.000262	0.103541	0.08774
562	-0.000214	-3.7e-05	0.101603	0.08597
563	-0.000312	-0.00035	0.100104	0.08456
564	-0.000562	-0.00042	0.098482	0.08303
565	-0.000757	-0.000673	0.096984	0.08179
566	-0.000954	-0.000941	0.095633	0.08063
567	-0.001173	-0.00111	0.094233	0.07937
568	-0.001454	-0.0012	0.093002	0.07819
569	-0.00152	-0.00131	0.091928	0.07723
570	-0.001612	-0.00143	0.090883	0.07628
571	-0.001688	-0.00144	0.089849	0.07547
572	-0.001925	-0.00166	0.088772	0.07452
573	-0.002128	-0.00187	0.08773	0.07361
574	-0.002075	-0.00189	0.086731	0.07281
575	-0.002277	-0.00202	0.08572	0.07187
576	-0.00241	-0.00216	0.084907	0.07105
577	-0.00233	-0.00217	0.084184	0.07044
578	-0.002623	-0.00219	0.08329	0.06958
579	-0.002528	-0.00226	0.082634	0.0691
580	-0.002608	-0.00233	0.081914	0.06856
581	-0.002715	-0.00238	0.08132	0.06797
582	-0.002703	-0.0026	0.080716	0.06753
583	-0.00289	-0.00235	0.080043	0.06701
584	-0.002857	-0.00242	0.079301	0.06631
585	-0.002889	-0.00219	0.078694	0.06584
586	-0.002303	-0.00213	0.077685	0.06558
587	-0.002118	-0.0021	0.077073	0.06511
588	-0.002229	-0.00214	0.0766	0.06462
589	-0.002193	-0.00207	0.076055	0.06416
590	-0.002118	-0.00212	0.075715	0.06381
591	-0.002276	-0.00231	0.075054	0.06337
592	-0.002362	-0.00219	0.074614	0.06294
593	-0.002351	-0.00219	0.074235	0.06269
594	-0.002336	-0.0022	0.073917	0.06235
595	-0.002319	-0.00235	0.073444	0.06202
596	-0.002316	-0.00217	0.072955	0.06152
597	-0.002215	-0.00227	0.072548	0.06114
598	-0.002382	-0.00232	0.072103	0.06072
599	-0.002293	-0.00225	0.071679	0.06035
600	-0.002315	-0.00234	0.071316	0.05999
601	-0.002437	-0.00241	0.07098	0.05973
602	-0.002574	-0.00228	0.070645	0.05953
603	-0.002381	-0.00232	0.070308	0.0591
604	-0.002492	-0.00231	0.069823	0.05882
605	-0.002419	-0.00234	0.069563	0.05855
606	-0.002413	-0.00227	0.069225	0.05833
607	-0.002404	-0.00243	0.0689	0.05799
608	-0.002455	-0.00258	0.068575	0.05774
609	-0.002647	-0.0024	0.068289	0.05746
610	-0.002604	-0.00234	0.067881	0.05717
611	-0.002432	-0.00235	0.067574	0.05692
612	-0.002577	-0.00228	0.067142	0.05643
613	-0.002493	-0.00244	0.066818	0.05627
614	-0.002601	-0.0024	0.066546	0.05599
615	-0.002552	-0.00243	0.066234	0.05567
616	-0.002555	-0.00229	0.065948	0.05552
617	-0.002447	-0.00227	0.065619	0.05531
618	-0.002424	-0.00245	0.065382	0.05509
619	-0.002727	-0.0025	0.065001	0.05465
620	-0.002673	-0.00258	0.0649	0.05456
621	-0.002718	-0.00244	0.064386	0.05403
622	-0.002605	-0.00252	0.064134	0.05403
623	-0.002723	-0.00251	0.063834	0.05377
624	-0.002597	-0.00248	0.063612	0.05348
625	-0.002628	-0.00233	0.063247	0.05323
626	-0.002501	-0.00235	0.063115	0.05304
627	-0.002603	-0.00256	0.06269	0.05273
628	-0.002721	-0.00255	0.062562	0.0526
629	-0.002649	-0.00247	0.062277	0.05229
630	-0.002566	-0.0026	0.061954	0.05206
631	-0.002598	-0.00261	0.061602	0.05175
632	-0.002664	-0.00245	0.061359	0.05164
633	-0.002704	-0.00245	0.061183	0.05153
634	-0.002543	-0.00241	0.061188	0.05135
635	-0.002523	-0.00246	0.060841	0.05104
636	-0.002557	-0.00237	0.060533	0.05078
637	-0.002527	-0.00227	0.060272	0.0504
638	-0.002332	-0.00223	0.059981	0.05024
639	-0.002528	-0.0023	0.059696	0.05
640	-0.002468	-0.00227	0.059533	0.04987
641	-0.002575	-0.00245	0.059185	0.04955
642	-0.002639	-0.00242	0.059184	0.04953
643	-0.00253	-0.00218	0.058977	0.04938
644	-0.002428	-0.00244	0.05859	0.04903
645	-0.002553	-0.00234	0.058328	0.04876
646	-0.002567	-0.00239	0.05808	0.04851
647	-0.002547	-0.0023	0.057822	0.04843
648	-0.002496	-0.00225	0.057627	0.04812
649	-0.002434	-0.00233	0.057531	0.04782
650	-0.002619	-0.00224	0.057323	0.04782
651	-0.002342	-0.00226	0.057119	0.04754
652	-0.002328	-0.00244	0.056731	0.04732
653	-0.002549	-0.00222	0.056662	0.04723
654	-0.002531	-0.0024	0.056302	0.04702
655	-0.00259	-0.00232	0.056037	0.04675
656	-0.002539	-0.00212	0.055845	0.04652
657	-0.002437	-0.00234	0.055599	0.0464
658	-0.002504	-0.0022	0.05543	0.04625
659	-0.002545	-0.00231	0.055243	0.04602
660	-0.002563	-0.00221	0.055007	0.04587
661	-0.002456	-0.00225	0.055074	0.04581
662	-0.002459	-0.00237	0.054603	0.04552
663	-0.002517	-0.00233	0.054614	0.04539
664	-0.002549	-0.00228	0.054305	0.0452
665	-0.002494	-0.00224	0.054129	0.04508
666	-0.002548	-0.00218	0.053923	0.04493
667	-0.002604	-0.00224	0.053633	0.04458
668	-0.002364	-0.00223	0.053443	0.04439
669	-0.002501	-0.00237	0.053122	0.04431
670	-0.002542	-0.00229	0.053027	0.04404
671	-0.002462	-0.00216	0.052936	0.04397
672	-0.002343	-0.00238	0.052781	0.04397
673	-0.002513	-0.0023	0.052583	0.04376
674	-0.00245	-0.00232	0.052372	0.0435
675	-0.002465	-0.00228	0.052193	0.04329
676	-0.002448	-0.00212	0.051949	0.04316
677	-0.002277	-0.00221	0.051767	0.04294
678	-0.002395	-0.00243	0.051648	0.04284
679	-0.002427	-0.0023	0.05165	0.0427
680	-0.002489	-0.00235	0.051357	0.04249
681	-0.002461	-0.00235	0.051166	0.04225
682	-0.002567	-0.0022	0.051015	0.04216
683	-0.002448	-0.00228	0.050806	0.04206
684	-0.00242	-0.00229	0.050677	0.04195
685	-0.002468	-0.00223	0.050507	0.04185
686	-0.002402	-0.00226	0.050195	0.04152
687	-0.002432	-0.00211	0.050195	0.04147
688	-0.002255	-0.00231	0.049922	0.04119
689	-0.002404	-0.00223	0.049766	0.04108
690	-0.002491	-0.0023	0.049662	0.04102
691	-0.00246	-0.00223	0.049408	0.04091
692	-0.002416	-0.00231	0.049252	0.0408
693	-0.002446	-0.00229	0.04926	0.04065
694	-0.00249	-0.00227	0.049021	0.04044
695	-0.002312	-0.00228	0.048779	0.04035
696	-0.002389	-0.00219	0.048553	0.04015
697	-0.002261	-0.00234	0.048375	0.03996
698	-0.002359	-0.00222	0.048162	0.03978
699	-0.00232	-0.00224	0.048064	0.03971
700	-0.00241	-0.00219	0.047866	0.03955
701	-0.002423	-0.00235	0.047778	0.03951
702	-0.002463	-0.0023	0.047635	0.03932
703	-0.002416	-0.00236	0.047615	0.03935
704	-0.002439	-0.00227	0.047446	0.03916
705	-0.002381	-0.00224	0.047211	0.03896
706	-0.002434	-0.00216	0.047015	0.03891
707	-0.002277	-0.00209	0.04687	0.03873
708	-0.002215	-0.00233	0.046619	0.03857
709	-0.002414	-0.00215	0.046624	0.03849
710	-0.002294	-0.00228	0.046378	0.0383
711	-0.002373	-0.00217	0.046423	0.03841
712	-0.002418	-0.00223	0.046149	0.0383
713	-0.002407	-0.00238	0.045891	0.03802
714	-0.002568	-0.00231	0.045806	0.03795
715	-0.002569	-0.00225	0.045578	0.03779
716	-0.002476	-0.00231	0.045598	0.03782
717	-0.002417	-0.00211	0.045354	0.03758
718	-0.002346	-0.00211	0.045172	0.03747
719	-0.002326	-0.00218	0.04501	0.0373
720	-0.002374	-0.00211	0.045056	0.03737
721	-0.002254	-0.00222	0.044811	0.03709
722	-0.002315	-0.0022	0.044562	0.03701
723	-0.002377	-0.00212	0.044432	0.0369
724	-0.00223	-0.00215	0.044386	0.03686
725	-0.002338	-0.00223	0.044219	0.03673
726	-0.002346	-0.00212	0.044023	0.03663
727	-0.002303	-0.00215	0.043958	0.03663
728	-0.002312	-0.00224	0.043764	0.03653
729	-0.002342	-0.00217	0.043757	0.03636
730	-0.002326	-0.00213	0.043543	0.0363
731	-0.002384	-0.00228	0.043412	0.03603
732	-0.002357	-0.00208	0.043178	0.03593
733	-0.002258	-0.00218	0.04316	0.03599
734	-0.002336	-0.00215	0.043023	0.03586
735	-0.002238	-0.00212	0.042896	0.03581
736	-0.00226	-0.00226	0.042716	0.03564
737	-0.002358	-0.00205	0.042573	0.03553
738	-0.002186	-0.00219	0.042502	0.03542
739	-0.002301	-0.00211	0.04228	0.03532
740	-0.002312	-0.00214	0.042295	0.03534
741	-0.002332	-0.0022	0.042119	0.03524
742	-0.002419	-0.00222	0.041993	0.03519
743	-0.002357	-0.00229	0.041764	0.03501
744	-0.00227	-0.00218	0.041626	0.03491
745	-0.002335	-0.00217	0.041527	0.0348
746	-0.002403	-0.00218	0.041461	0.03469
747	-0.002253	-0.00199	0.041357	0.03464
748	-0.002258	-0.00216	0.041304	0.03462
749	-0.002392	-0.00219	0.041082	0.03446
750	-0.002285	-0.00222	0.04091	0.03434
751	-0.002441	-0.0021	0.040835	0.03439
752	-0.002295	-0.00222	0.040756	0.03418
753	-0.002397	-0.00207	0.040508	0.03413
754	-0.002329	-0.00211	0.040379	0.03406
755	-0.00242	-0.00206	0.040255	0.03392
756	-0.002306	-0.00214	0.040165	0.03388
757	-0.002252	-0.00209	0.040095	0.03383
758	-0.00224	-0.00218	0.039909	0.03363
759	-0.002434	-0.00209	0.039723	0.03364
760	-0.002185	-0.00215	0.039621	0.03347
761	-0.002211	-0.00219	0.039547	0.03335
762	-0.002372	-0.00205	0.039391	0.03332
763	-0.002272	-0.00215	0.039256	0.03327
764	-0.002397	-0.0022	0.039214	0.03319
765	-0.002387	-0.00217	0.038944	0.03296
766	-0.002405	-0.00209	0.038795	0.03302
767	-0.002361	-0.00199	0.038666	0.03293
768	-0.002162	-0.00207	0.038716	0.03291
769	-0.002229	-0.00201	0.038456	0.03269
770	-0.002266	-0.00207	0.038382	0.03266
771	-0.002236	-0.00212	0.038208	0.03251
772	-0.00234	-0.00207	0.038065	0.0325
773	-0.002532	-0.00211	0.038091	0.03245
774	-0.002375	-0.00204	0.037801	0.03226
775	-0.002392	-0.00206	0.037796	0.03216
776	-0.002433	-0.00213	0.037589	0.032
777	-0.002456	-0.00209	0.037392	0.03184
778	-0.002198	-0.00189	0.037351	0.0318
779	-0.002166	-0.00188	0.037145	0.03161
780	-0.002114	-0.00198	0.037174	0.0316
781	-0.002339	-0.00206	0.036929	0.03146
782	-0.00239	-0.00195	0.036848	0.03143
783	-0.002347	-0.00207	0.03682	0.03139
784	-0.002325	-0.00182	0.036729	0.03125
785	-0.002134	-0.00193	0.036714	0.03131
786	-0.002398	-0.00212	0.036621	0.03108
787	-0.002308	-0.00204	0.036458	0.03104
788	-0.002358	-0.00187	0.036478	0.03106
789	-0.002142	-0.00195	0.036204	0.0307
790	-0.002212	-0.00188	0.036103	0.03073
791	-0.00213	-0.00193	0.035974	0.03053
792	-0.00231	-0.00196	0.035933	0.03047
793	-0.002295	-0.00187	0.035933	0.03042
794	-0.002264	-0.0018	0.035797	0.03025
795	-0.001926	-0.00193	0.035697	0.03019
796	-0.00222	-0.00187	0.035659	0.03012
797	-0.002016	-0.00181	0.035381	0.02996
798	-0.002021	-0.0019	0.035409	0.02991
799	-0.001871	-0.00178	0.035273	0.02972
800	-0.00184	-0.00391	0.03517	0.02972

## Sheet: Figure 6 (a)
	SVF (ppm)				SVF (ppm)				SVF (ppm)
Flame height (mm)	n-heptane	standard deviation		Flame height (mm)	n-heptane-F100	standard deviation		Flame height (mm)	n-heptane-F500	standard deviation
41.5598	0.0448658	0.00481005		41.054	0.0452849	0.00451247		40.9483	0.0447323	0.00392357
41.5242	0.0368489	0.00951831		41.0184	0.0402098	0.0112535		40.9127	0.0383467	0.00932501
41.4886	0.0391226	0.010605		40.9827	0.0404361	0.0118474		40.8771	0.0384452	0.0112723
41.4529	0.042197	0.0118094		40.9471	0.043345	0.0114334		40.8414	0.0417496	0.00974525
41.4173	0.0436073	0.0138872		40.9115	0.045134	0.0129252		40.8058	0.0445161	0.0108015
41.3817	0.0454052	0.0138925		40.8759	0.0476104	0.0143632		40.7702	0.0451098	0.0109878
41.3461	0.0498337	0.0146139		40.8403	0.0489738	0.0142864		40.7346	0.0465441	0.0130514
41.3105	0.0524683	0.0140143		40.8046	0.0536424	0.0157425		40.699	0.0491328	0.0130384
41.2748	0.0564715	0.0159272		40.769	0.0566821	0.0154558		40.6633	0.0497032	0.0142541
41.2392	0.0601948	0.0174038		40.7334	0.060714	0.0145808		40.6277	0.0545908	0.013195
41.2036	0.0625908	0.0177647		40.6978	0.0637598	0.0164855		40.5921	0.0585372	0.0146878
41.168	0.0672993	0.0173401		40.6621	0.0679115	0.0177815		40.5565	0.0608041	0.0153558
41.1323	0.0720824	0.0193871		40.6265	0.0733385	0.0165462		40.5209	0.0635759	0.0167156
41.0967	0.0759708	0.0174475		40.5909	0.0779566	0.0156537		40.4852	0.0667222	0.0161468
41.0611	0.080522	0.0197054		40.5553	0.0794377	0.0174653		40.4496	0.0714372	0.0167626
41.0255	0.0841392	0.0232156		40.5197	0.083425	0.0198317		40.414	0.0724579	0.017502
40.9899	0.0888633	0.0239477		40.484	0.0860684	0.019592		40.3784	0.0778794	0.0191727
40.9542	0.0921404	0.0196137		40.4484	0.0914261	0.0166873		40.3427	0.0788981	0.0188141
40.9186	0.0967999	0.0230416		40.4128	0.0970248	0.0186289		40.3071	0.0866563	0.019139
40.883	0.102139	0.0231507		40.3772	0.100609	0.0214664		40.2715	0.0888322	0.0195447
40.8474	0.10792	0.0264431		40.3416	0.108742	0.0247564		40.2359	0.0926914	0.018002
40.8118	0.114344	0.0244963		40.3059	0.113063	0.0221844		40.2003	0.0951671	0.0191982
40.7761	0.123001	0.0279271		40.2703	0.119845	0.0221394		40.1646	0.101789	0.0201292
40.7405	0.125449	0.0276812		40.2347	0.125019	0.0262131		40.129	0.103059	0.0214207
40.7049	0.131819	0.0290579		40.1991	0.12844	0.0237254		40.0934	0.110344	0.0243793
40.6693	0.141583	0.0336576		40.1635	0.135226	0.0251836		40.0578	0.116324	0.0248554
40.6337	0.146647	0.0313576		40.1278	0.139912	0.0256683		40.0222	0.118809	0.0224961
40.598	0.149066	0.0352031		40.0922	0.149225	0.0288956		39.9865	0.12524	0.0269782
40.5624	0.15661	0.0342141		40.0566	0.153878	0.0292415		39.9509	0.131379	0.0240823
40.5268	0.164254	0.0347195		40.021	0.161157	0.0259975		39.9153	0.138226	0.0294877
40.4912	0.173628	0.0359874		39.9853	0.170464	0.0311234		39.8797	0.142616	0.0325932
40.4555	0.178749	0.0371893		39.9497	0.176898	0.032579		39.8441	0.145937	0.0326445
40.4199	0.187183	0.0362891		39.9141	0.186677	0.0295605		39.8084	0.150712	0.034737
40.3843	0.197386	0.0413585		39.8785	0.193182	0.0322665		39.7728	0.159211	0.0336234
40.3487	0.204394	0.0434656		39.8429	0.203899	0.0366666		39.7372	0.163558	0.0309555
40.3131	0.214444	0.0449066		39.8072	0.205933	0.033818		39.7016	0.168525	0.036068
40.2774	0.223585	0.0421052		39.7716	0.215525	0.0366926		39.6659	0.175843	0.0370594
40.2418	0.230927	0.0489429		39.736	0.222163	0.0362815		39.6303	0.182302	0.036017
40.2062	0.239722	0.043709		39.7004	0.231562	0.0365251		39.5947	0.190266	0.0382685
40.1706	0.245441	0.0445849		39.6648	0.241998	0.0358808		39.5591	0.198347	0.0368537
40.135	0.254122	0.0471128		39.6291	0.246026	0.0362679		39.5235	0.204799	0.0391631
40.0993	0.264978	0.04696		39.5935	0.257476	0.0371382		39.4878	0.210836	0.037035
40.0637	0.274804	0.047639		39.5579	0.262215	0.0392741		39.4522	0.213946	0.0411553
40.0281	0.286168	0.0531046		39.5223	0.273311	0.0406146		39.4166	0.222471	0.0412984
39.9925	0.299659	0.0552961		39.4867	0.283643	0.0425419		39.381	0.22824	0.0436811
39.9569	0.308524	0.0558415		39.451	0.290448	0.0434311		39.3454	0.236672	0.0462368
39.9212	0.31519	0.0550129		39.4154	0.300216	0.0442609		39.3097	0.243661	0.04513
39.8856	0.328915	0.0542054		39.3798	0.305355	0.0464093		39.2741	0.251319	0.0488975
39.85	0.335095	0.0565937		39.3442	0.315905	0.0442283		39.2385	0.258393	0.048227
39.8144	0.344504	0.0641301		39.3085	0.319694	0.046298		39.2029	0.26472	0.0513048
39.7787	0.356407	0.0617036		39.2729	0.337763	0.0484665		39.1672	0.26888	0.0515033
39.7431	0.364946	0.061454		39.2373	0.342083	0.0479243		39.1316	0.275345	0.0516496
39.7075	0.374044	0.0641777		39.2017	0.348537	0.0532625		39.096	0.282845	0.057407
39.6719	0.386797	0.062893		39.1661	0.360239	0.0580961		39.0604	0.292232	0.0577405
39.6363	0.397611	0.0690951		39.1304	0.36852	0.0550192		39.0248	0.300971	0.0565914
39.6006	0.412625	0.0733427		39.0948	0.381193	0.0594135		38.9891	0.305777	0.0519267
39.565	0.419439	0.0667193		39.0592	0.392613	0.0615266		38.9535	0.316889	0.0543683
39.5294	0.431216	0.0663432		39.0236	0.40235	0.0570068		38.9179	0.323909	0.0593433
39.4938	0.443071	0.0689039		38.988	0.408623	0.0558158		38.8823	0.334227	0.0607041
39.4582	0.449473	0.0704956		38.9523	0.421447	0.0557112		38.8467	0.341646	0.0628682
39.4225	0.464528	0.0647083		38.9167	0.42855	0.0559682		38.811	0.351786	0.0635142
39.3869	0.472612	0.0699593		38.8811	0.443836	0.0562601		38.7754	0.356939	0.0639865
39.3513	0.48913	0.0630016		38.8455	0.451662	0.0645078		38.7398	0.363085	0.0634153
39.3157	0.502822	0.0687127		38.8098	0.46335	0.0619812		38.7042	0.370541	0.0683327
39.28	0.513153	0.0754693		38.7742	0.472342	0.0652413		38.6686	0.380532	0.0667441
39.2444	0.527255	0.0759984		38.7386	0.478562	0.0648451		38.6329	0.385398	0.0706788
39.2088	0.539773	0.0794299		38.703	0.49543	0.0724044		38.5973	0.399825	0.068122
39.1732	0.55294	0.0818247		38.6674	0.505451	0.0689308		38.5617	0.410467	0.0697242
39.1376	0.561501	0.0788504		38.6317	0.515366	0.0714165		38.5261	0.414975	0.0690467
39.1019	0.569899	0.0763759		38.5961	0.520502	0.0699423		38.4904	0.420589	0.0702725
39.0663	0.578732	0.0757024		38.5605	0.533421	0.0730303		38.4548	0.426042	0.0704787
39.0307	0.587843	0.0786557		38.5249	0.546528	0.0756371		38.4192	0.436837	0.0709854
38.9951	0.601534	0.073942		38.4893	0.558568	0.0809048		38.3836	0.44907	0.0771338
38.9595	0.611217	0.0792911		38.4536	0.567225	0.0820554		38.348	0.458707	0.0788375
38.9238	0.630114	0.0828008		38.418	0.57575	0.0786123		38.3123	0.462825	0.0718187
38.8882	0.641888	0.0871486		38.3824	0.586531	0.0724437		38.2767	0.473451	0.0757239
38.8526	0.646435	0.0806717		38.3468	0.58879	0.0726978		38.2411	0.481073	0.0712488
38.817	0.654722	0.0840547		38.3112	0.598122	0.0793588		38.2055	0.489992	0.0780026
38.7814	0.665155	0.0820519		38.2755	0.608925	0.0766676		38.1699	0.4998	0.0818155
38.7457	0.682607	0.0837741		38.2399	0.61419	0.0742087		38.1342	0.507705	0.076147
38.7101	0.692654	0.0846728		38.2043	0.626779	0.0825989		38.0986	0.514698	0.080895
38.6745	0.706447	0.0841572		38.1687	0.638333	0.0793771		38.063	0.525397	0.0821523
38.6389	0.715513	0.082065		38.133	0.648823	0.0767612		38.0274	0.533372	0.0908585
38.6032	0.726437	0.0843336		38.0974	0.657667	0.0773998		37.9918	0.541992	0.0879157
38.5676	0.739681	0.0838111		38.0618	0.668375	0.0813446		37.9561	0.551944	0.0904797
38.532	0.753501	0.0885249		38.0262	0.680202	0.0784242		37.9205	0.559843	0.0914081
38.4964	0.762651	0.0868932		37.9906	0.687908	0.0738397		37.8849	0.569552	0.0922106
38.4608	0.771244	0.0835209		37.9549	0.704919	0.0798495		37.8493	0.581661	0.0951158
38.4251	0.779412	0.0818594		37.9193	0.718406	0.0848857		37.8136	0.591594	0.0994715
38.3895	0.794012	0.078071		37.8837	0.728897	0.0849748		37.778	0.604739	0.0968138
38.3539	0.806023	0.0762153		37.8481	0.741057	0.0829003		37.7424	0.611207	0.0915034
38.3183	0.820562	0.0861191		37.8125	0.747458	0.0871493		37.7068	0.62131	0.0979073
38.2827	0.827454	0.0858988		37.7768	0.752651	0.0834721		37.6712	0.627068	0.100868
38.247	0.838657	0.0921066		37.7412	0.763051	0.0861326		37.6355	0.626208	0.102427
38.2114	0.852585	0.0877649		37.7056	0.774026	0.0860229		37.5999	0.642037	0.0890852
38.1758	0.860482	0.0871171		37.67	0.77789	0.0823156		37.5643	0.648216	0.0908355
38.1402	0.873373	0.091408		37.6344	0.790552	0.0868562		37.5287	0.657197	0.0932683
38.1046	0.884476	0.0883312		37.5987	0.803731	0.0865049		37.4931	0.664044	0.098107
38.0689	0.890351	0.092028		37.5631	0.81678	0.0920645		37.4574	0.672992	0.0998698
38.0333	0.897829	0.0885984		37.5275	0.824991	0.0898636		37.4218	0.679091	0.097435
37.9977	0.911559	0.089142		37.4919	0.843621	0.0950503		37.3862	0.690683	0.101485
37.9621	0.920689	0.096225		37.4562	0.848947	0.0949855		37.3506	0.699725	0.105761
37.9264	0.92702	0.093565		37.4206	0.857192	0.0931605		37.3149	0.710655	0.106758
37.8908	0.937549	0.0942358		37.385	0.870129	0.0902582		37.2793	0.718509	0.102376
37.8552	0.94784	0.097706		37.3494	0.875299	0.0933526		37.2437	0.728957	0.10755
37.8196	0.956206	0.0934297		37.3138	0.881633	0.0982266		37.2081	0.729863	0.11128
37.784	0.966642	0.0896161		37.2781	0.887532	0.096714		37.1725	0.739245	0.116658
37.7483	0.983669	0.0948593		37.2425	0.893247	0.0993821		37.1368	0.748151	0.107271
37.7127	0.991947	0.0976062		37.2069	0.904892	0.10355		37.1012	0.760599	0.112099
37.6771	0.995716	0.0941238		37.1713	0.903135	0.096727		37.0656	0.761751	0.106546
37.6415	1.00677	0.0982377		37.1357	0.917097	0.101878		37.03	0.775335	0.111804
37.6059	1.01936	0.0973078		37.1	0.923085	0.0991936		36.9944	0.785948	0.119352
37.5702	1.02194	0.092078		37.0644	0.932832	0.0977591		36.9587	0.789737	0.115454
37.5346	1.03223	0.101272		37.0288	0.942047	0.104629		36.9231	0.797324	0.116595
37.499	1.04631	0.0992084		36.9932	0.954963	0.107297		36.8875	0.804568	0.115745
37.4634	1.06073	0.0961556		36.9575	0.969132	0.104587		36.8519	0.813956	0.121106
37.4277	1.07321	0.104075		36.9219	0.976968	0.108097		36.8163	0.818912	0.110785
37.3921	1.07733	0.104465		36.8863	0.978511	0.1097		36.7806	0.827655	0.115189
37.3565	1.09191	0.109478		36.8507	0.988705	0.111488		36.745	0.839107	0.11212
37.3209	1.10579	0.110026		36.8151	1.00347	0.113285		36.7094	0.845482	0.115125
37.2853	1.10722	0.116203		36.7794	1.00261	0.11649		36.6738	0.856061	0.122331
37.2496	1.11232	0.108584		36.7438	1.01091	0.117897		36.6381	0.859847	0.123027
37.214	1.11087	0.114442		36.7082	1.02499	0.112984		36.6025	0.864979	0.121871
37.1784	1.12349	0.109811		36.6726	1.03236	0.112128		36.5669	0.871182	0.127684
37.1428	1.13181	0.115381		36.637	1.03853	0.108259		36.5313	0.881978	0.123825
37.1072	1.14401	0.111772		36.6013	1.04809	0.113591		36.4957	0.88552	0.122127
37.0715	1.15463	0.116593		36.5657	1.05259	0.115281		36.46	0.894067	0.124756
37.0359	1.16294	0.122082		36.5301	1.05825	0.115416		36.4244	0.901879	0.122898
37.0003	1.17814	0.128293		36.4945	1.07206	0.114068		36.3888	0.906563	0.128516
36.9647	1.18297	0.129466		36.4589	1.07735	0.106987		36.3532	0.912459	0.131062
36.9291	1.19655	0.122048		36.4232	1.08133	0.115805		36.3176	0.919179	0.135315
36.8934	1.19473	0.130716		36.3876	1.08917	0.122276		36.2819	0.923158	0.134392
36.8578	1.20587	0.120244		36.352	1.0942	0.117042		36.2463	0.933739	0.130401
36.8222	1.21771	0.117754		36.3164	1.10903	0.114191		36.2107	0.941419	0.132293
36.7866	1.2144	0.126939		36.2807	1.11378	0.123882		36.1751	0.946625	0.130219
36.7509	1.22286	0.125052		36.2451	1.126	0.117603		36.1394	0.957587	0.129312
36.7153	1.23535	0.127427		36.2095	1.12533	0.119734		36.1038	0.967926	0.136299
36.6797	1.23916	0.124803		36.1739	1.12537	0.128395		36.0682	0.968223	0.137721
36.6441	1.25107	0.124864		36.1383	1.13124	0.119129		36.0326	0.977493	0.142049
36.6085	1.25696	0.135596		36.1026	1.13683	0.122036		35.997	0.984527	0.144585
36.5728	1.26408	0.120985		36.067	1.14961	0.123737		35.9613	0.994147	0.139028
36.5372	1.26217	0.132076		36.0314	1.15672	0.124763		35.9257	1.00863	0.149883
36.5016	1.27148	0.136135		35.9958	1.16421	0.132293		35.8901	1.01103	0.144749
36.466	1.27698	0.136205		35.9602	1.16815	0.129342		35.8545	1.01374	0.146056
36.4304	1.28272	0.132899		35.9245	1.17738	0.135317		35.8189	1.01577	0.148352
36.3947	1.29005	0.144795		35.8889	1.17742	0.127828		35.7832	1.02436	0.143607
36.3591	1.30515	0.126805		35.8533	1.18724	0.127028		35.7476	1.03101	0.14833
36.3235	1.31342	0.122838		35.8177	1.1918	0.126381		35.712	1.0371	0.143842
36.2879	1.31674	0.119809		35.7821	1.19378	0.125029		35.6764	1.03771	0.140873
36.2523	1.32209	0.119066		35.7464	1.20112	0.119186		35.6408	1.04639	0.149719
36.2166	1.32809	0.139422		35.7108	1.20401	0.122713		35.6051	1.05138	0.15351
36.181	1.33791	0.139792		35.6752	1.21663	0.125556		35.5695	1.06134	0.152256
36.1454	1.33955	0.138494		35.6396	1.21858	0.129008		35.5339	1.06756	0.158387
36.1098	1.34956	0.136927		35.6039	1.22929	0.123589		35.4983	1.06919	0.149298
36.0741	1.34396	0.131432		35.5683	1.23021	0.124924		35.4626	1.07849	0.154112
36.0385	1.34832	0.139276		35.5327	1.23017	0.128254		35.427	1.08764	0.148963
36.0029	1.35338	0.136016		35.4971	1.23361	0.129792		35.3914	1.09017	0.156349
35.9673	1.35949	0.138641		35.4615	1.24567	0.137282		35.3558	1.09113	0.149351
35.9317	1.36716	0.144002		35.4258	1.25345	0.136254		35.3202	1.09182	0.154815
35.896	1.37513	0.139027		35.3902	1.2563	0.133152		35.2845	1.10361	0.157985
35.8604	1.37696	0.140857		35.3546	1.27154	0.128314		35.2489	1.10357	0.159973
35.8248	1.37289	0.144046		35.319	1.27219	0.131081		35.2133	1.12098	0.166521
35.7892	1.38588	0.144597		35.2834	1.26861	0.134789		35.1777	1.1291	0.161549
35.7536	1.39217	0.151563		35.2477	1.27041	0.134129		35.1421	1.13139	0.166247
35.7179	1.39001	0.158039		35.2121	1.27854	0.141089		35.1064	1.1439	0.16693
35.6823	1.39471	0.151108		35.1765	1.28158	0.138099		35.0708	1.14143	0.166685
35.6467	1.40362	0.145782		35.1409	1.27863	0.133689		35.0352	1.14607	0.167419
35.6111	1.39768	0.144377		35.1052	1.29322	0.129392		34.9996	1.15311	0.16823
35.5754	1.40538	0.152292		35.0696	1.28994	0.135023		34.964	1.16142	0.167293
35.5398	1.40281	0.142288		35.034	1.29904	0.137689		34.9283	1.16227	0.169753
35.5042	1.40295	0.146696		34.9984	1.29746	0.134131		34.8927	1.1679	0.172148
35.4686	1.41226	0.149639		34.9628	1.30448	0.144215		34.8571	1.17346	0.176522
35.433	1.40685	0.158007		34.9271	1.30523	0.142691		34.8215	1.17064	0.172566
35.3973	1.41195	0.160601		34.8915	1.31832	0.139806		34.7858	1.17905	0.172494
35.3617	1.42074	0.160802		34.8559	1.32572	0.14799		34.7502	1.19001	0.173189
35.3261	1.42382	0.155233		34.8203	1.31913	0.143213		34.7146	1.18699	0.171766
35.2905	1.43293	0.159626		34.7847	1.33225	0.149591		34.679	1.18623	0.176452
35.2549	1.42956	0.163602		34.749	1.33128	0.15176		34.6434	1.1943	0.175514
35.2192	1.42872	0.166919		34.7134	1.33212	0.149475		34.6077	1.19778	0.171386
35.1836	1.43424	0.165026		34.6778	1.32901	0.161208		34.5721	1.20247	0.170874
35.148	1.44315	0.171498		34.6422	1.3322	0.152838		34.5365	1.20316	0.175044
35.1124	1.44099	0.176472		34.6066	1.33438	0.158116		34.5009	1.20118	0.177331
35.0768	1.44831	0.17512		34.5709	1.34372	0.158498		34.4653	1.20282	0.178662
35.0411	1.45038	0.175187		34.5353	1.33786	0.157642		34.4296	1.2119	0.17774
35.0055	1.45697	0.177567		34.4997	1.34293	0.162145		34.394	1.21559	0.188394
34.9699	1.44993	0.178205		34.4641	1.35044	0.162647		34.3584	1.2207	0.192844
34.9343	1.46127	0.17641		34.4284	1.34761	0.166178		34.3228	1.22998	0.189367
34.8986	1.46585	0.183677		34.3928	1.3457	0.166104		34.2871	1.22776	0.189217
34.863	1.46331	0.175064		34.3572	1.34201	0.163931		34.2515	1.22665	0.183298
34.8274	1.4553	0.178645		34.3216	1.34651	0.161663		34.2159	1.23196	0.188867
34.7918	1.46229	0.175379		34.286	1.34879	0.158465		34.1803	1.22928	0.185096
34.7562	1.46123	0.18069		34.2503	1.35127	0.156883		34.1447	1.23307	0.188664
34.7205	1.46773	0.181699		34.2147	1.354	0.169971		34.109	1.22897	0.183525
34.6849	1.46105	0.172984		34.1791	1.36627	0.182128		34.0734	1.23052	0.185788
34.6493	1.46698	0.190772		34.1435	1.35741	0.173938		34.0378	1.23155	0.191
34.6137	1.4617	0.176112		34.1079	1.36141	0.179598		34.0022	1.23165	0.189635
34.5781	1.46712	0.185387		34.0722	1.35679	0.177921		33.9666	1.23718	0.195148
34.5424	1.46391	0.184484		34.0366	1.35741	0.178649		33.9309	1.23632	0.202058
34.5068	1.4616	0.187549		34.001	1.36125	0.176726		33.8953	1.2348	0.194677
34.4712	1.46508	0.19184		33.9654	1.36348	0.17504		33.8597	1.23539	0.197067
34.4356	1.46964	0.188718		33.9298	1.3731	0.175911		33.8241	1.23507	0.192967
34.3999	1.46362	0.188886		33.8941	1.36838	0.171342		33.7885	1.23392	0.197019
34.3643	1.466	0.188163		33.8585	1.36041	0.173277		33.7528	1.23659	0.192063
34.3287	1.46237	0.180431		33.8229	1.35945	0.167668		33.7172	1.24068	0.195882
34.2931	1.4626	0.189268		33.7873	1.35522	0.166189		33.6816	1.24451	0.205746
34.2575	1.458	0.187538		33.7516	1.35416	0.17252		33.646	1.24554	0.19997
34.2218	1.46164	0.191725		33.716	1.3513	0.172206		33.6103	1.25021	0.198464
34.1862	1.4675	0.208945		33.6804	1.35078	0.172717		33.5747	1.24268	0.20092
34.1506	1.4715	0.202241		33.6448	1.35568	0.173353		33.5391	1.24986	0.202552
34.115	1.47439	0.204155		33.6092	1.35776	0.17403		33.5035	1.24348	0.20208
34.0794	1.46966	0.208835		33.5735	1.35558	0.173831		33.4679	1.24432	0.1965
34.0437	1.47419	0.209724		33.5379	1.36091	0.166404		33.4322	1.2425	0.19354
34.0081	1.46501	0.215		33.5023	1.35256	0.166735		33.3966	1.23274	0.184445
33.9725	1.47023	0.201089		33.4667	1.35336	0.174879		33.361	1.23595	0.18475
33.9369	1.47701	0.21471		33.4311	1.34974	0.17585		33.3254	1.23773	0.19446
33.9013	1.4716	0.212214		33.3954	1.35022	0.174321		33.2898	1.23601	0.190284
33.8656	1.46922	0.213891		33.3598	1.34871	0.173044		33.2541	1.24011	0.186054
33.83	1.46016	0.206382		33.3242	1.35158	0.173612		33.2185	1.24407	0.1856
33.7944	1.45843	0.2054		33.2886	1.35351	0.182111		33.1829	1.23894	0.189754
33.7588	1.46258	0.203286		33.2529	1.34845	0.173292		33.1473	1.23296	0.187516
33.7231	1.45994	0.206455		33.2173	1.35381	0.178115		33.1117	1.23267	0.180432
33.6875	1.45986	0.205579		33.1817	1.34668	0.167224		33.076	1.22984	0.186529
33.6519	1.46617	0.225994		33.1461	1.34179	0.176457		33.0404	1.2337	0.188283
33.6163	1.45403	0.214545		33.1105	1.33334	0.169891		33.0048	1.23056	0.186126
33.5807	1.45985	0.212428		33.0748	1.32944	0.164749		32.9692	1.22703	0.188014
33.545	1.45144	0.219791		33.0392	1.32386	0.161358		32.9335	1.23117	0.181113
33.5094	1.4612	0.219858		33.0036	1.33603	0.163129		32.8979	1.22939	0.184365
33.4738	1.46015	0.213158		32.968	1.3376	0.159619		32.8623	1.23077	0.187065
33.4382	1.46162	0.216595		32.9324	1.33711	0.153124		32.8267	1.22259	0.171569
33.4026	1.45814	0.208739		32.8967	1.33495	0.161523		32.7911	1.23107	0.17453
33.3669	1.4592	0.218565		32.8611	1.3345	0.16855		32.7554	1.23349	0.176803
33.3313	1.45514	0.218112		32.8255	1.33129	0.158969		32.7198	1.23482	0.183884
33.2957	1.44173	0.214458		32.7899	1.33919	0.163466		32.6842	1.23859	0.183906
33.2601	1.44037	0.21789		32.7543	1.32689	0.161161		32.6486	1.23312	0.173471
33.2245	1.44771	0.213117		32.7186	1.326	0.159481		32.613	1.22533	0.169472
33.1888	1.43893	0.21524		32.683	1.32743	0.159384		32.5773	1.22628	0.177395
33.1532	1.43478	0.220846		32.6474	1.31456	0.157582		32.5417	1.21841	0.175572
33.1176	1.42812	0.215947		32.6118	1.31864	0.161981		32.5061	1.21962	0.171962
33.082	1.42473	0.203537		32.5761	1.32279	0.157067		32.4705	1.21861	0.166083
33.0463	1.41905	0.201075		32.5405	1.32004	0.154383		32.4348	1.21719	0.168825
33.0107	1.42725	0.195906		32.5049	1.31876	0.153784		32.3992	1.21829	0.159719
32.9751	1.42615	0.205287		32.4693	1.30946	0.146165		32.3636	1.22025	0.164037
32.9395	1.43185	0.21199		32.4337	1.31305	0.157116		32.328	1.22273	0.160425
32.9039	1.41438	0.206509		32.398	1.31105	0.160694		32.2924	1.22962	0.162718
32.8682	1.41766	0.204408		32.3624	1.31163	0.157945		32.2567	1.22531	0.160323
32.8326	1.40984	0.203696		32.3268	1.30932	0.161033		32.2211	1.22041	0.155293
32.797	1.41394	0.203499		32.2912	1.30569	0.158862		32.1855	1.22263	0.158661
32.7614	1.41301	0.203002		32.2556	1.3063	0.159532		32.1499	1.20968	0.151978
32.7258	1.41782	0.211845		32.2199	1.29913	0.153391		32.1143	1.21398	0.154319
32.6901	1.4144	0.211828		32.1843	1.2993	0.15339		32.0786	1.21334	0.166421
32.6545	1.39919	0.210797		32.1487	1.30074	0.156262		32.043	1.21359	0.157081
32.6189	1.40115	0.206526		32.1131	1.29531	0.156287		32.0074	1.21668	0.151954
32.5833	1.39937	0.204027		32.0774	1.29532	0.150637		31.9718	1.21443	0.146864
32.5476	1.39147	0.210176		32.0418	1.28629	0.146982		31.9362	1.21484	0.150828
32.512	1.38934	0.208012		32.0062	1.29039	0.153097		31.9005	1.21022	0.150372
32.4764	1.38248	0.204914		31.9706	1.28981	0.153129		31.8649	1.20893	0.15084
32.4408	1.37765	0.198291		31.935	1.28161	0.14686		31.8293	1.20777	0.141673
32.4052	1.37946	0.20581		31.8993	1.29005	0.143284		31.7937	1.20663	0.142054
32.3695	1.38175	0.210609		31.8637	1.28807	0.138742		31.758	1.20594	0.147118
32.3339	1.37941	0.191542		31.8281	1.28314	0.135187		31.7224	1.19818	0.141453
32.2983	1.38181	0.202307		31.7925	1.27663	0.140073		31.6868	1.20035	0.1477
32.2627	1.37477	0.194679		31.7569	1.27679	0.135946		31.6512	1.19973	0.143133
32.2271	1.37786	0.199784		31.7212	1.27152	0.133506		31.6156	1.19402	0.147083
32.1914	1.38048	0.19739		31.6856	1.27333	0.141669		31.5799	1.18868	0.140802
32.1558	1.37718	0.191144		31.65	1.26803	0.140069		31.5443	1.19414	0.151829
32.1202	1.37846	0.194839		31.6144	1.26397	0.134324		31.5087	1.18671	0.150992
32.0846	1.37124	0.186222		31.5788	1.26192	0.128135		31.4731	1.1906	0.156601
32.049	1.36828	0.187344		31.5431	1.26164	0.129836		31.4375	1.1925	0.150834
32.0133	1.3679	0.179157		31.5075	1.26284	0.123916		31.4018	1.18228	0.145341
31.9777	1.36201	0.177387		31.4719	1.26328	0.132118		31.3662	1.18416	0.146369
31.9421	1.36126	0.170998		31.4363	1.25481	0.127834		31.3306	1.18386	0.139068
31.9065	1.35979	0.171627		31.4006	1.26192	0.126618		31.295	1.17595	0.137759
31.8708	1.35647	0.167864		31.365	1.25643	0.117847		31.2594	1.17416	0.130519
31.8352	1.35315	0.175147		31.3294	1.25249	0.123159		31.2237	1.1821	0.133096
31.7996	1.35048	0.173649		31.2938	1.25555	0.120343		31.1881	1.17812	0.129945
31.764	1.34387	0.168584		31.2582	1.24383	0.113066		31.1525	1.17646	0.131165
31.7284	1.3416	0.170062		31.2225	1.2429	0.117981		31.1169	1.17696	0.127558
31.6927	1.3292	0.166834		31.1869	1.24294	0.120272		31.0812	1.18065	0.137575
31.6571	1.3284	0.164315		31.1513	1.24192	0.114685		31.0456	1.17412	0.135797
31.6215	1.32686	0.169364		31.1157	1.24313	0.114025		31.01	1.16662	0.135876
31.5859	1.3204	0.164481		31.0801	1.24294	0.112802		30.9744	1.17082	0.143977
31.5503	1.3241	0.1603		31.0444	1.23796	0.112032		30.9388	1.16515	0.145347
31.5146	1.31937	0.154459		31.0088	1.229	0.104691		30.9031	1.16487	0.141862
31.479	1.31407	0.160146		30.9732	1.2293	0.104067		30.8675	1.16734	0.146548
31.4434	1.30565	0.160749		30.9376	1.22435	0.104024		30.8319	1.16621	0.13534
31.4078	1.30354	0.164251		30.902	1.22409	0.107487		30.7963	1.16249	0.130688
31.3722	1.30834	0.159203		30.8663	1.21755	0.110859		30.7607	1.16652	0.137272
31.3365	1.2945	0.155677		30.8307	1.21151	0.103756		30.725	1.15946	0.134246
31.3009	1.29822	0.15325		30.7951	1.21358	0.10132		30.6894	1.16052	0.143584
31.2653	1.29635	0.158079		30.7595	1.2139	0.0959933		30.6538	1.1578	0.136279
31.2297	1.29539	0.157926		30.7238	1.21609	0.0963695		30.6182	1.14998	0.133603
31.194	1.29134	0.154509		30.6882	1.21317	0.0935256		30.5825	1.1498	0.125245
31.1584	1.29545	0.146363		30.6526	1.21538	0.0882899		30.5469	1.15353	0.127731
31.1228	1.29524	0.151289		30.617	1.2072	0.0951527		30.5113	1.15639	0.125886
31.0872	1.30134	0.152805		30.5814	1.20399	0.0950926		30.4757	1.15344	0.12756
31.0516	1.29533	0.152948		30.5457	1.20428	0.102202		30.4401	1.15159	0.126982
31.0159	1.2962	0.135402		30.5101	1.20483	0.101531		30.4044	1.14886	0.128022
30.9803	1.28245	0.135863		30.4745	1.20924	0.102165		30.3688	1.15243	0.128196
30.9447	1.27748	0.140859		30.4389	1.19972	0.0969132		30.3332	1.14443	0.1233
30.9091	1.27458	0.134785		30.4033	1.20504	0.0979953		30.2976	1.15369	0.124339
30.8735	1.27835	0.138133		30.3676	1.20391	0.0909429		30.262	1.14759	0.124544
30.8378	1.27334	0.134996		30.332	1.19298	0.0877301		30.2263	1.14229	0.119121
30.8022	1.28418	0.130644		30.2964	1.18638	0.0916473		30.1907	1.13644	0.122248
30.7666	1.28256	0.131005		30.2608	1.19021	0.0891892		30.1551	1.14263	0.126843
30.731	1.28238	0.130483		30.2251	1.18518	0.0915642		30.1195	1.14204	0.130769
30.6953	1.28301	0.14058		30.1895	1.18574	0.0935434		30.0839	1.13876	0.130092
30.6597	1.27846	0.134079		30.1539	1.19591	0.0955411		30.0482	1.13749	0.123332
30.6241	1.27496	0.133162		30.1183	1.18271	0.0996749		30.0126	1.13232	0.124786
30.5885	1.26959	0.133835		30.0827	1.1932	0.0979978		29.977	1.13119	0.120194
30.5529	1.27309	0.132108		30.047	1.19205	0.103551		29.9414	1.12919	0.123497
30.5172	1.26436	0.12784		30.0114	1.18749	0.102041		29.9057	1.13634	0.122768
30.4816	1.26346	0.12563		29.9758	1.18619	0.105916		29.8701	1.13957	0.12945
30.446	1.25394	0.120564		29.9402	1.18286	0.0990364		29.8345	1.1346	0.127601
30.4104	1.25348	0.129197		29.9046	1.18994	0.107542		29.7989	1.13479	0.122347
30.3748	1.24043	0.128454		29.8689	1.18117	0.0994989		29.7633	1.13272	0.125113
30.3391	1.24716	0.124612		29.8333	1.18806	0.0980414		29.7276	1.13006	0.12456
30.3035	1.23805	0.121356		29.7977	1.17908	0.105195		29.692	1.13534	0.124097
30.2679	1.23843	0.121815		29.7621	1.17775	0.10223		29.6564	1.12971	0.12574
30.2323	1.23462	0.116505		29.7265	1.17661	0.104034		29.6208	1.12377	0.136656
30.1967	1.23793	0.12362		29.6908	1.17317	0.103622		29.5852	1.12001	0.126804
30.161	1.23729	0.123656		29.6552	1.17308	0.104238		29.5495	1.11801	0.133825
30.1254	1.23348	0.126027		29.6196	1.17196	0.1012		29.5139	1.11757	0.133601
30.0898	1.23677	0.116991		29.584	1.17259	0.0966089		29.4783	1.1183	0.127863
30.0542	1.23432	0.113981		29.5483	1.16825	0.106331		29.4427	1.11776	0.134778
30.0185	1.22582	0.107676		29.5127	1.16584	0.11156		29.4071	1.11839	0.130298
29.9829	1.22423	0.110942		29.4771	1.15562	0.109683		29.3714	1.1128	0.128586
29.9473	1.21633	0.109792		29.4415	1.15961	0.105758		29.3358	1.12021	0.13467
29.9117	1.2248	0.107989		29.4059	1.15491	0.105509		29.3002	1.1132	0.138025
29.8761	1.20929	0.113618		29.3702	1.15082	0.105408		29.2646	1.11266	0.141217
29.8404	1.20934	0.107952		29.3346	1.14743	0.107645		29.2289	1.10945	0.128673
29.8048	1.21231	0.103417		29.299	1.15067	0.113358		29.1933	1.10587	0.144014
29.7692	1.20441	0.101252		29.2634	1.15917	0.120055		29.1577	1.10336	0.1388
29.7336	1.20807	0.103221		29.2278	1.14796	0.112869		29.1221	1.09937	0.136239
29.698	1.21487	0.113057		29.1921	1.15606	0.116462		29.0865	1.09341	0.142289
29.6623	1.20602	0.10939		29.1565	1.15004	0.11553		29.0508	1.0912	0.135121
29.6267	1.20213	0.111498		29.1209	1.14396	0.120344		29.0152	1.08889	0.141186
29.5911	1.19239	0.110653		29.0853	1.13833	0.117769		28.9796	1.08827	0.142161
29.5555	1.19308	0.12742		29.0497	1.13651	0.119806		28.944	1.093	0.140664
29.5199	1.18507	0.128258		29.014	1.13203	0.120122		28.9084	1.08775	0.142998
29.4842	1.18087	0.123502		28.9784	1.12182	0.121653		28.8727	1.09421	0.141188
29.4486	1.18753	0.132415		28.9428	1.11844	0.119853		28.8371	1.09396	0.13822
29.413	1.18895	0.125948		28.9072	1.11641	0.116499		28.8015	1.08908	0.14085
29.3774	1.17703	0.123859		28.8715	1.12477	0.119733		28.7659	1.08617	0.139284
29.3417	1.17492	0.117714		28.8359	1.11755	0.12207		28.7302	1.08184	0.139947
29.3061	1.17336	0.121088		28.8003	1.11005	0.12376		28.6946	1.0737	0.143227
29.2705	1.16941	0.124469		28.7647	1.11148	0.124539		28.659	1.07856	0.147955
29.2349	1.17472	0.118953		28.7291	1.10707	0.121231		28.6234	1.0694	0.142955
29.1993	1.17734	0.121792		28.6934	1.10224	0.122921		28.5878	1.07098	0.147196
29.1636	1.17922	0.124099		28.6578	1.10001	0.125667		28.5521	1.08156	0.140213
29.128	1.17398	0.126811		28.6222	1.10062	0.127681		28.5165	1.07403	0.136929
29.0924	1.16136	0.127664		28.5866	1.09273	0.126025		28.4809	1.06952	0.137978
29.0568	1.15111	0.12432		28.551	1.09376	0.119976		28.4453	1.07549	0.148688
29.0212	1.14972	0.11785		28.5153	1.09554	0.126325		28.4097	1.07188	0.148076
28.9855	1.14035	0.124754		28.4797	1.09117	0.125423		28.374	1.06876	0.146548
28.9499	1.13689	0.124849		28.4441	1.09166	0.125846		28.3384	1.06159	0.145873
28.9143	1.13188	0.124232		28.4085	1.09132	0.128083		28.3028	1.06192	0.146342
28.8787	1.13109	0.128751		28.3728	1.08804	0.131616		28.2672	1.0552	0.145491
28.843	1.12414	0.126835		28.3372	1.08146	0.129718		28.2316	1.05317	0.142499
28.8074	1.12211	0.127281		28.3016	1.08164	0.129495		28.1959	1.04726	0.144431
28.7718	1.11876	0.12543		28.266	1.07398	0.135082		28.1603	1.04712	0.144479
28.7362	1.11985	0.120912		28.2304	1.07326	0.128037		28.1247	1.04397	0.142717
28.7006	1.11193	0.123555		28.1947	1.06763	0.131936		28.0891	1.03807	0.152026
28.6649	1.11857	0.11963		28.1591	1.06509	0.134427		28.0534	1.03337	0.150508
28.6293	1.11026	0.125509		28.1235	1.05818	0.137937		28.0178	1.03365	0.155602
28.5937	1.1075	0.128753		28.0879	1.05645	0.140922		27.9822	1.02441	0.151998
28.5581	1.10629	0.131172		28.0523	1.04611	0.145255		27.9466	1.02186	0.152561
28.5225	1.10525	0.137835		28.0166	1.04441	0.150772		27.911	1.01987	0.150011
28.4868	1.09982	0.126648		27.981	1.04421	0.14244		27.8753	1.01353	0.151307
28.4512	1.10595	0.132845		27.9454	1.0367	0.153771		27.8397	1.01417	0.152115
28.4156	1.09489	0.128602		27.9098	1.03395	0.139788		27.8041	1.01604	0.150311
28.38	1.08865	0.140183		27.8742	1.03039	0.147161		27.7685	1.00868	0.150426
28.3444	1.08426	0.135		27.8385	1.02596	0.148947		27.7329	1.00027	0.14977
28.3087	1.0849	0.134466		27.8029	1.02304	0.14459		27.6972	1.00707	0.149688
28.2731	1.07237	0.131553		27.7673	1.02225	0.143492		27.6616	0.996703	0.14336
28.2375	1.07471	0.133371		27.7317	1.01849	0.142239		27.626	0.995298	0.147742
28.2019	1.0698	0.132592		27.696	1.01164	0.144489		27.5904	0.987732	0.14135
28.1662	1.06307	0.135059		27.6604	1.00611	0.140403		27.5547	0.986288	0.142991
28.1306	1.06513	0.133006		27.6248	1.0026	0.14075		27.5191	0.977292	0.147662
28.095	1.06687	0.134071		27.5892	0.996776	0.137729		27.4835	0.971008	0.145771
28.0594	1.05496	0.135922		27.5536	0.999424	0.143084		27.4479	0.970383	0.146109
28.0238	1.04874	0.135987		27.5179	1.00269	0.140168		27.4123	0.966838	0.143958
27.9881	1.04966	0.130154		27.4823	0.990385	0.143298		27.3766	0.962573	0.150378
27.9525	1.04753	0.134141		27.4467	0.983814	0.149088		27.341	0.956553	0.146838
27.9169	1.04534	0.137408		27.4111	0.980572	0.156218		27.3054	0.960012	0.147322
27.8813	1.03475	0.13287		27.3755	0.972023	0.145945		27.2698	0.953201	0.146258
27.8457	1.03429	0.138015		27.3398	0.968454	0.145829		27.2342	0.948099	0.144603
27.81	1.02855	0.136176		27.3042	0.964851	0.144656		27.1985	0.942892	0.144193
27.7744	1.03077	0.138117		27.2686	0.961528	0.145147		27.1629	0.942885	0.146557
27.7388	1.02124	0.137149		27.233	0.954896	0.14914		27.1273	0.941918	0.144919
27.7032	1.02423	0.139486		27.1974	0.952067	0.151109		27.0917	0.939686	0.14838
27.6676	1.01891	0.138149		27.1617	0.945457	0.150468		27.0561	0.93718	0.151896
27.6319	1.00886	0.136081		27.1261	0.943937	0.149402		27.0204	0.925686	0.147073
27.5963	1.0071	0.14348		27.0905	0.943098	0.147225		26.9848	0.921566	0.143824
27.5607	1.00271	0.142145		27.0549	0.943567	0.142221		26.9492	0.913024	0.144776
27.5251	1.00291	0.142918		27.0192	0.940316	0.139985		26.9136	0.917284	0.149895
27.4894	1.0023	0.148977		26.9836	0.939065	0.149006		26.8779	0.912799	0.142111
27.4538	0.996839	0.142144		26.948	0.92675	0.145801		26.8423	0.90652	0.140933
27.4182	0.995831	0.140757		26.9124	0.92343	0.14168		26.8067	0.898496	0.145539
27.3826	0.98878	0.140897		26.8768	0.919396	0.141516		26.7711	0.896246	0.144013
27.347	0.981336	0.14806		26.8411	0.91265	0.148413		26.7355	0.891621	0.14501
27.3113	0.976083	0.146073		26.8055	0.909305	0.148674		26.6998	0.897253	0.145439
27.2757	0.966686	0.143879		26.7699	0.895558	0.14445		26.6642	0.890232	0.14743
27.2401	0.961605	0.145268		26.7343	0.894243	0.148978		26.6286	0.889216	0.146617
27.2045	0.9589	0.145885		26.6987	0.892766	0.144658		26.593	0.886885	0.1455
27.1689	0.960378	0.14161		26.663	0.8785	0.141709		26.5574	0.880141	0.13994
27.1332	0.948961	0.144095		26.6274	0.887558	0.154737		26.5217	0.881602	0.153902
27.0976	0.94512	0.138926		26.5918	0.875751	0.154986		26.4861	0.869827	0.145376
27.062	0.941631	0.134897		26.5562	0.872699	0.149524		26.4505	0.863035	0.149692
27.0264	0.931547	0.138531		26.5205	0.869733	0.149896		26.4149	0.8549	0.142823
26.9907	0.930198	0.129796		26.4849	0.868131	0.145577		26.3793	0.854513	0.144565
26.9551	0.928501	0.13788		26.4493	0.855816	0.143781		26.3436	0.849341	0.145442
26.9195	0.921352	0.142247		26.4137	0.859484	0.145528		26.308	0.848441	0.139019
26.8839	0.917742	0.141367		26.3781	0.851532	0.144568		26.2724	0.839685	0.146148
26.8483	0.914276	0.139579		26.3424	0.846315	0.148934		26.2368	0.836205	0.135873
26.8126	0.899042	0.136875		26.3068	0.839803	0.149749		26.2011	0.831573	0.136911
26.777	0.904682	0.141653		26.2712	0.833009	0.154557		26.1655	0.830643	0.135338
26.7414	0.898051	0.131283		26.2356	0.82643	0.153271		26.1299	0.822713	0.136208
26.7058	0.894048	0.133325		26.2	0.821619	0.150672		26.0943	0.818149	0.143401
26.6702	0.891163	0.129895		26.1643	0.81825	0.161357		26.0587	0.814888	0.13843
26.6345	0.884636	0.128574		26.1287	0.818895	0.153989		26.023	0.812936	0.140936
26.5989	0.879413	0.130224		26.0931	0.813532	0.161695		25.9874	0.805348	0.143184
26.5633	0.870503	0.132955		26.0575	0.810194	0.15775		25.9518	0.804971	0.145496
26.5277	0.867245	0.130611		26.0219	0.801012	0.158207		25.9162	0.79837	0.148168
26.4921	0.861318	0.13783		25.9862	0.795988	0.152809		25.8806	0.786418	0.138824
26.4564	0.85241	0.139351		25.9506	0.791751	0.152732		25.8449	0.786428	0.137355
26.4208	0.849588	0.136003		25.915	0.787136	0.146106		25.8093	0.780962	0.13642
26.3852	0.849475	0.141735		25.8794	0.781229	0.152805		25.7737	0.774709	0.142193
26.3496	0.840719	0.1405		25.8437	0.776619	0.146631		25.7381	0.768329	0.141476
26.3139	0.843068	0.137549		25.8081	0.769192	0.144637		25.7024	0.768835	0.143331
26.2783	0.82745	0.132927		25.7725	0.758736	0.143858		25.6668	0.769874	0.140498
26.2427	0.823807	0.133516		25.7369	0.756232	0.149636		25.6312	0.764546	0.142427
26.2071	0.822133	0.141948		25.7013	0.752593	0.150487		25.5956	0.758912	0.135878
26.1715	0.813716	0.141612		25.6656	0.741773	0.148451		25.56	0.752922	0.141339
26.1358	0.807172	0.138818		25.63	0.743707	0.155104		25.5243	0.742732	0.140336
26.1002	0.804736	0.141013		25.5944	0.738181	0.156009		25.4887	0.741705	0.138343
26.0646	0.799641	0.136563		25.5588	0.727753	0.152127		25.4531	0.740549	0.141018
26.029	0.789379	0.139478		25.5232	0.717039	0.149947		25.4175	0.731833	0.139872
25.9934	0.77542	0.136453		25.4875	0.709655	0.147036		25.3819	0.727757	0.143139
25.9577	0.776317	0.139624		25.4519	0.702772	0.148644		25.3462	0.727757	0.148265
25.9221	0.769911	0.134739		25.4163	0.703407	0.152408		25.3106	0.716845	0.141872
25.8865	0.7599	0.136145		25.3807	0.700711	0.151703		25.275	0.711829	0.144086
25.8509	0.75965	0.138131		25.3451	0.686599	0.154683		25.2394	0.704875	0.144775
25.8152	0.754967	0.131082		25.3094	0.686935	0.153516		25.2038	0.704396	0.142611
25.7796	0.748631	0.131301		25.2738	0.682401	0.156805		25.1681	0.703394	0.14341
25.744	0.743232	0.128084		25.2382	0.676208	0.156231		25.1325	0.689326	0.14156
25.7084	0.734418	0.124368		25.2026	0.667849	0.157276		25.0969	0.684316	0.141706
25.6728	0.733632	0.132901		25.1669	0.662755	0.160028		25.0613	0.677109	0.138299
25.6371	0.725512	0.132308		25.1313	0.662587	0.162951		25.0256	0.678129	0.141056
25.6015	0.713177	0.127743		25.0957	0.65078	0.166351		24.99	0.66841	0.147836
25.5659	0.707271	0.126017		25.0601	0.65116	0.163894		24.9544	0.659621	0.144647
25.5303	0.70847	0.126482		25.0245	0.64764	0.168909		24.9188	0.657838	0.150131
25.4947	0.708796	0.139009		24.9888	0.639832	0.161546		24.8832	0.653468	0.152314
25.459	0.700792	0.132968		24.9532	0.632806	0.163575		24.8475	0.651368	0.153489
25.4234	0.69587	0.135828		24.9176	0.625977	0.156228		24.8119	0.643134	0.152298
25.3878	0.681971	0.132164		24.882	0.618706	0.158574		24.7763	0.641049	0.147161
25.3522	0.681003	0.136984		24.8464	0.616961	0.163392		24.7407	0.635188	0.145601
25.3166	0.668833	0.133841		24.8107	0.604486	0.171407		24.7051	0.630879	0.145451
25.2809	0.65978	0.132509		24.7751	0.600388	0.166865		24.6694	0.626536	0.152186
25.2453	0.657362	0.134708		24.7395	0.59654	0.170596		24.6338	0.626534	0.151179
25.2097	0.652054	0.129034		24.7039	0.588587	0.166697		24.5982	0.617778	0.151283
25.1741	0.645799	0.127921		24.6682	0.581774	0.164514		24.5626	0.608185	0.150492
25.1384	0.641721	0.131976		24.6326	0.578531	0.171077		24.527	0.599046	0.145198
25.1028	0.629711	0.131535		24.597	0.576372	0.171608		24.4913	0.60112	0.146582
25.0672	0.625914	0.131683		24.5614	0.565614	0.168017		24.4557	0.58898	0.146459
25.0316	0.618294	0.134105		24.5258	0.555104	0.167692		24.4201	0.585099	0.150314
24.996	0.61283	0.134335		24.4901	0.548435	0.167068		24.3845	0.584816	0.150583
24.9603	0.607175	0.13545		24.4545	0.544326	0.168774		24.3488	0.577231	0.155746
24.9247	0.600803	0.133888		24.4189	0.536971	0.166391		24.3132	0.571389	0.155028
24.8891	0.594588	0.136382		24.3833	0.53633	0.163636		24.2776	0.570441	0.156034
24.8535	0.590447	0.134875		24.3477	0.529005	0.166557		24.242	0.55766	0.150383
24.8179	0.585498	0.13271		24.312	0.523106	0.166522		24.2064	0.557907	0.148124
24.7822	0.577545	0.134659		24.2764	0.516309	0.167128		24.1707	0.55106	0.151573
24.7466	0.574559	0.138829		24.2408	0.504123	0.165376		24.1351	0.543554	0.152779
24.711	0.567065	0.133268		24.2052	0.50591	0.164338		24.0995	0.53574	0.151552
24.6754	0.560016	0.128462		24.1696	0.495442	0.16578		24.0639	0.535	0.150334
24.6398	0.556296	0.130527		24.1339	0.486083	0.157811		24.0283	0.529986	0.155187
24.6041	0.5445	0.124907		24.0983	0.484065	0.162531		23.9926	0.522714	0.153981
24.5685	0.535593	0.127754		24.0627	0.479791	0.162437		23.957	0.518553	0.152784
24.5329	0.52923	0.125328		24.0271	0.472857	0.156493		23.9214	0.514622	0.150519
24.4973	0.519121	0.124192		23.9914	0.464876	0.162268		23.8858	0.508749	0.153483
24.4616	0.518552	0.122353		23.9558	0.458075	0.162675		23.8501	0.498602	0.150042
24.426	0.51043	0.124701		23.9202	0.457282	0.168028		23.8145	0.49049	0.152768
24.3904	0.502879	0.124669		23.8846	0.445326	0.166983		23.7789	0.486177	0.154272
24.3548	0.496419	0.123676		23.849	0.438828	0.168224		23.7433	0.483681	0.156655
24.3192	0.49145	0.125851		23.8133	0.432999	0.165847		23.7077	0.477753	0.155824
24.2835	0.480797	0.129243		23.7777	0.423628	0.165987		23.672	0.469622	0.154826
24.2479	0.476883	0.131814		23.7421	0.418268	0.16841		23.6364	0.463791	0.153533
24.2123	0.470092	0.12566		23.7065	0.414488	0.167112		23.6008	0.4549	0.153358
24.1767	0.464468	0.127356		23.6709	0.40815	0.167221		23.5652	0.444376	0.15537
24.1411	0.45541	0.126112		23.6352	0.405666	0.160614		23.5296	0.444132	0.152873
24.1054	0.448509	0.12542		23.5996	0.398692	0.158813		23.4939	0.439093	0.149933
24.0698	0.444788	0.132813		23.564	0.390187	0.158843		23.4583	0.436225	0.154849
24.0342	0.431726	0.126887		23.5284	0.381948	0.153489		23.4227	0.425171	0.149246
23.9986	0.426228	0.127109		23.4927	0.378172	0.155723		23.3871	0.417244	0.151784
23.9629	0.419682	0.126931		23.4571	0.370734	0.152065		23.3515	0.417004	0.149272
23.9273	0.414602	0.124174		23.4215	0.360457	0.156442		23.3158	0.408064	0.150813
23.8917	0.403821	0.120812		23.3859	0.353995	0.158868		23.2802	0.398476	0.147799
23.8561	0.400272	0.119519		23.3503	0.351415	0.160659		23.2446	0.395136	0.149063
23.8205	0.391833	0.120749		23.3146	0.347097	0.15566		23.209	0.390187	0.149635
23.7848	0.387687	0.127108		23.279	0.33411	0.154011		23.1733	0.382053	0.144815
23.7492	0.3774	0.122802		23.2434	0.328729	0.15759		23.1377	0.373768	0.139024
23.7136	0.371439	0.122582		23.2078	0.328416	0.153582		23.1021	0.370283	0.145135
23.678	0.36527	0.121943		23.1722	0.317911	0.151151		23.0665	0.361335	0.145914
23.6424	0.357062	0.122464		23.1365	0.3136	0.147885		23.0309	0.352458	0.141305
23.6067	0.35066	0.116314		23.1009	0.305735	0.144378		22.9952	0.349933	0.142122
23.5711	0.342763	0.118126		23.0653	0.296909	0.141762		22.9596	0.342717	0.141274
23.5355	0.340649	0.118346		23.0297	0.294372	0.142519		22.924	0.337253	0.137673
23.4999	0.328527	0.11411		22.9941	0.287082	0.14346		22.8884	0.329329	0.136379
23.4643	0.321149	0.111847		22.9584	0.284238	0.143306		22.8528	0.326932	0.133688
23.4286	0.314427	0.109923		22.9228	0.278915	0.138305		22.8171	0.322029	0.136367
23.393	0.311099	0.113916		22.8872	0.269783	0.13765		22.7815	0.316582	0.135322
23.3574	0.304327	0.107905		22.8516	0.267363	0.136531		22.7459	0.30902	0.135126
23.3218	0.298737	0.111906		22.8159	0.260915	0.135368		22.7103	0.304947	0.133889
23.2861	0.291524	0.109885		22.7803	0.255588	0.135673		22.6747	0.296604	0.133494
23.2505	0.28407	0.110342		22.7447	0.248753	0.132531		22.639	0.290667	0.13195
23.2149	0.27843	0.107406		22.7091	0.242961	0.131104		22.6034	0.283628	0.13155
23.1793	0.273739	0.106429		22.6735	0.237854	0.129171		22.5678	0.281733	0.132455
23.1437	0.270975	0.110356		22.6378	0.232587	0.127713		22.5322	0.274209	0.129385
23.108	0.265427	0.10516		22.6022	0.228642	0.125968		22.4965	0.26853	0.125464
23.0724	0.256483	0.0988597		22.5666	0.219885	0.118953		22.4609	0.260891	0.125532
23.0368	0.249191	0.10001		22.531	0.211981	0.117071		22.4253	0.255287	0.124532
23.0012	0.244146	0.0999144		22.4954	0.207599	0.116112		22.3897	0.248339	0.120147
22.9656	0.239091	0.0995784		22.4597	0.203203	0.114716		22.3541	0.241974	0.120441
22.9299	0.231472	0.0954799		22.4241	0.198196	0.109169		22.3184	0.235328	0.119951
22.8943	0.222229	0.0905987		22.3885	0.192263	0.109811		22.2828	0.232018	0.116421
22.8587	0.216569	0.0895826		22.3529	0.18584	0.106138		22.2472	0.228311	0.112848
22.8231	0.212851	0.0872584		22.3173	0.182124	0.10555		22.2116	0.224351	0.116475
22.7875	0.205853	0.0861911		22.2816	0.176201	0.10267		22.176	0.219339	0.109763
22.7518	0.197354	0.0843327		22.246	0.172824	0.102632		22.1403	0.212381	0.107585
22.7162	0.197515	0.0821223		22.2104	0.171759	0.104722		22.1047	0.205828	0.104863
22.6806	0.189266	0.0796538		22.1748	0.166064	0.0962721		22.0691	0.199664	0.101103
22.645	0.187988	0.0785888		22.1391	0.161448	0.0940604		22.0335	0.196091	0.100989
22.6093	0.181323	0.0773507		22.1035	0.157783	0.0950237		21.9978	0.188611	0.101455
22.5737	0.178384	0.0764473		22.0679	0.152038	0.0912766		21.9622	0.183673	0.0956316
22.5381	0.170486	0.0726277		22.0323	0.150277	0.0898849		21.9266	0.180038	0.0954935
22.5025	0.167867	0.0713027		21.9967	0.144513	0.0870825		21.891	0.175231	0.0968994
22.4669	0.160858	0.0693891		21.961	0.141453	0.0833755		21.8554	0.170505	0.0935399
22.4312	0.156667	0.0674969		21.9254	0.134716	0.0779825		21.8197	0.16572	0.0916279
22.3956	0.150443	0.0648029		21.8898	0.134507	0.078948		21.7841	0.165437	0.0930847
22.36	0.147858	0.066078		21.8542	0.128634	0.0768761		21.7485	0.159625	0.0871936
22.3244	0.143367	0.0634184		21.8186	0.126435	0.0741443		21.7129	0.1537	0.0855756
22.2888	0.136042	0.0587734		21.7829	0.123574	0.0708736		21.6773	0.149932	0.0860791
22.2531	0.136754	0.0608639		21.7473	0.120108	0.0716665		21.6416	0.14547	0.0820778
22.2175	0.132779	0.056942		21.7117	0.114586	0.0675941		21.606	0.141336	0.0815911
22.1819	0.128793	0.0586065		21.6761	0.110662	0.0618915		21.5704	0.137813	0.0806312
22.1463	0.12416	0.0540147		21.6404	0.110753	0.0629017		21.5348	0.134016	0.0755087
22.1106	0.120251	0.0515144		21.6048	0.10854	0.062468		21.4992	0.129375	0.0769722
22.075	0.119763	0.0499641		21.5692	0.102635	0.0585573		21.4635	0.127167	0.0739928
22.0394	0.115626	0.0484421		21.5336	0.102563	0.0575574		21.4279	0.121185	0.0687991
22.0038	0.111888	0.0482648		21.498	0.098572	0.0557124		21.3923	0.116986	0.0695512
21.9682	0.107931	0.0466791		21.4623	0.0979133	0.0531398		21.3567	0.114787	0.0653954
21.9325	0.103855	0.0414328		21.4267	0.0938915	0.0545409		21.321	0.113888	0.0662675
21.8969	0.102998	0.0391221		21.3911	0.0916078	0.0493857		21.2854	0.111306	0.0647322
21.8613	0.100969	0.0406582		21.3555	0.0897044	0.0487604		21.2498	0.110307	0.0644488
21.8257	0.0943927	0.0365543		21.3199	0.0874845	0.0454635		21.2142	0.108498	0.0649271
21.7901	0.0956965	0.0396962		21.2842	0.0852925	0.0486944		21.1786	0.103282	0.0608167
21.7544	0.0924372	0.0379848		21.2486	0.0803182	0.0462104		21.1429	0.0986208	0.0611343
21.7188	0.0904121	0.03551		21.213	0.0793767	0.0415541		21.1073	0.099975	0.0600254
21.6832	0.0895984	0.0333374		21.1774	0.0780738	0.0402082		21.0717	0.0949674	0.0546466
21.6476	0.0840804	0.0341912		21.1418	0.0755007	0.0393293		21.0361	0.0933046	0.055723
21.612	0.0872645	0.0322871		21.1061	0.0749137	0.0391103		21.0005	0.0932463	0.0548619
21.5763	0.0803036	0.0294891		21.0705	0.07257	0.0386025		20.9648	0.0879027	0.0549498
21.5407	0.079147	0.0285218		21.0349	0.0715516	0.0371642		20.9292	0.084238	0.0490051
21.5051	0.0798343	0.0305255		20.9993	0.0699668	0.0354024		20.8936	0.0841614	0.0504424
21.4695	0.0755857	0.0251093		20.9636	0.0663625	0.0356366		20.858	0.080909	0.0488685
21.4338	0.0746988	0.0271231		20.928	0.0661826	0.0332254		20.8224	0.0819882	0.0456091
21.3982	0.0733474	0.0251989		20.8924	0.0646872	0.0327176		20.7867	0.07603	0.0410887
21.3626	0.0705516	0.0218343		20.8568	0.065363	0.0327819		20.7511	0.0754286	0.0404563
21.327	0.0650821	0.0190834		20.8212	0.064188	0.0304505		20.7155	0.0730591	0.039884
21.2914	0.0676313	0.0222575		20.7855	0.0616287	0.0305947		20.6799	0.0728602	0.0372691
21.2557	0.065155	0.0214612		20.7499	0.0595275	0.029463		20.6442	0.0717284	0.0365956
21.2201	0.066056	0.0222005		20.7143	0.059843	0.0278064		20.6086	0.0679844	0.0355037
21.1845	0.0631749	0.0224992		20.6787	0.0603688	0.0268222		20.573	0.0665024	0.0345216
21.1489	0.063974	0.0230262		20.6431	0.0568491	0.0281847		20.5374	0.066152	0.0341935
21.1133	0.0626941	0.0199077		20.6074	0.0562352	0.0266783		20.5018	0.063663	0.0333024
21.0776	0.0609588	0.0206086		20.5718	0.0551173	0.0228681		20.4661	0.0624774	0.0301792
21.042	0.0616262	0.0191855		20.5362	0.0531213	0.0231761		20.4305	0.060596	0.0282925
21.0064	0.057602	0.0187478		20.5006	0.053725	0.0230245		20.3949	0.0600501	0.0283949
20.9708	0.0574266	0.0172431		20.465	0.0517675	0.0213983		20.3593	0.0574506	0.0271124
20.9352	0.0564111	0.0167538		20.4293	0.0525148	0.0212553		20.3237	0.0568611	0.0268334
20.8995	0.0539324	0.0187406		20.3937	0.0506893	0.0193174		20.288	0.0576726	0.0283201
20.8639	0.0551021	0.0174581		20.3581	0.0492168	0.0205339		20.2524	0.056648	0.0249866
20.8283	0.052419	0.0158339		20.3225	0.0503556	0.0198757		20.2168	0.0527212	0.0249284
20.7927	0.0543781	0.0141856		20.2868	0.0481057	0.0184234		20.1812	0.0533444	0.0261997
20.757	0.0531789	0.015716		20.2512	0.0474341	0.0185772		20.1455	0.053196	0.0247313
20.7214	0.0529739	0.0155456		20.2156	0.0480695	0.0183675		20.1099	0.0502866	0.0221248
20.6858	0.0507503	0.0139232		20.18	0.0477265	0.0183246		20.0743	0.0518395	0.0216408
20.6502	0.0510142	0.0131622		20.1444	0.0469783	0.0193573		20.0387	0.0504386	0.0224196
20.6146	0.0507712	0.0141747		20.1087	0.04569	0.0203437		20.0031	0.0489713	0.0205477
20.5789	0.0509302	0.0131553		20.0731	0.0459656	0.0174709		19.9674	0.047833	0.0226288
20.5433	0.0489891	0.0148341		20.0375	0.0435456	0.0159779		19.9318	0.0468407	0.0215041
20.5077	0.0509123	0.0149972		20.0019	0.0447779	0.0159843		19.8962	0.0464126	0.0203201
20.4721	0.0483604	0.0143446		19.9663	0.0437555	0.015004		19.8606	0.0450382	0.0220963
20.4365	0.0483319	0.0122505		19.9306	0.0420502	0.0156945		19.825	0.0465213	0.0213337
20.4008	0.0465086	0.0141751		19.895	0.0438499	0.0153127		19.7893	0.0443757	0.017908
20.3652	0.0474149	0.0146684		19.8594	0.0419287	0.0144274		19.7537	0.0430977	0.0165398
20.3296	0.0472937	0.013415		19.8238	0.0405594	0.0136109		19.7181	0.0444366	0.0171683
20.294	0.0452796	0.0125267		19.7881	0.040885	0.0118777		19.6825	0.0443979	0.0172036
20.2583	0.0474022	0.0132228		19.7525	0.0420756	0.0126702		19.6469	0.0420209	0.0162122
20.2227	0.0463273	0.0107623		19.7169	0.0390728	0.0149665		19.6112	0.0416129	0.0175249
20.1871	0.043219	0.0130163		19.6813	0.0390718	0.0154706		19.5756	0.0410013	0.0161187
20.1515	0.0446317	0.0109984		19.6457	0.0384773	0.0132967		19.54	0.0411192	0.0147233
20.1159	0.0440078	0.0143668		19.61	0.0398416	0.0139505		19.5044	0.0423126	0.0151027
20.0802	0.0440811	0.0135265		19.5744	0.0391122	0.0132237		19.4687	0.0399266	0.0148924
20.0446	0.04343	0.0111845		19.5388	0.0377654	0.0141763		19.4331	0.0395581	0.0152124
20.009	0.0438607	0.0105851		19.5032	0.0368432	0.0126107		19.3975	0.0404185	0.0139171
19.9734	0.0422171	0.0104475		19.4676	0.0374967	0.0121635		19.3619	0.0388771	0.0152457
19.9378	0.0414056	0.0118368		19.4319	0.0370296	0.0127689		19.3263	0.0390899	0.0154268
19.9021	0.0391763	0.0117138		19.3963	0.0378487	0.0126187		19.2906	0.0368185	0.0127687
19.8665	0.0400321	0.0102905		19.3607	0.0365269	0.0133646		19.255	0.0386428	0.0141796
19.8309	0.0424894	0.0134458		19.3251	0.0365158	0.0102897		19.2194	0.0358701	0.0138903
19.7953	0.0387534	0.0101857		19.2895	0.0368134	0.010831		19.1838	0.035134	0.0129812
19.7597	0.0398325	0.00973727		19.2538	0.0362164	0.0126422		19.1482	0.0358582	0.0127493
19.724	0.0408054	0.0134066		19.2182	0.0341449	0.01265		19.1125	0.0371428	0.0140782
19.6884	0.0387436	0.00995955		19.1826	0.0337961	0.0127514		19.0769	0.0356169	0.0112714
19.6528	0.039373	0.0100173		19.147	0.0350035	0.0126572		19.0413	0.03616	0.0122759
19.6172	0.0385363	0.0113579		19.1113	0.0367453	0.011369		19.0057	0.0352672	0.0124163
19.5815	0.037288	0.0108563		19.0757	0.0345772	0.0109108		18.97	0.0358155	0.0121813
19.5459	0.0386473	0.0107996		19.0401	0.0332092	0.0130013		18.9344	0.0357139	0.010966
19.5103	0.038387	0.0116784		19.0045	0.0335567	0.0117665		18.8988	0.0328343	0.0107385
19.4747	0.0367859	0.0116992		18.9689	0.0349968	0.0121283		18.8632	0.0350662	0.0106428
19.4391	0.0365431	0.0102102		18.9332	0.032745	0.0114092		18.8276	0.0344848	0.011158
19.4034	0.0356877	0.00996827		18.8976	0.0341487	0.0104443		18.7919	0.0338693	0.0101401
19.3678	0.0386161	0.0111569		18.862	0.0335672	0.0124475		18.7563	0.0325052	0.0111945
19.3322	0.0350283	0.0088346		18.8264	0.033178	0.011785		18.7207	0.033007	0.0114867
19.2966	0.0370926	0.0109369		18.7908	0.0332478	0.0121858		18.6845	0.0312843	0.0113828
19.261	0.0349605	0.0103234		18.7551	0.0319602	0.0121417		18.6489	0.0317184	0.0106092
19.2253	0.0348041	0.0104225		18.7195	0.0315651	0.01058		18.6132	0.0330448	0.00962889
19.1897	0.035772	0.00990311		18.6839	0.0311524	0.0115647		18.5776	0.0317239	0.0107875
19.1541	0.0349655	0.0112742		18.6483	0.0301655	0.0116346		18.542	0.0314858	0.0111146
19.1185	0.0344495	0.00935969		18.6127	0.0314382	0.0113704		18.5064	0.0306357	0.0100273
19.0829	0.0345014	0.0119638		18.577	0.0311112	0.0106615		18.4708	0.030061	0.00984263
19.0472	0.0333463	0.00866798		18.5414	0.0299767	0.0112106		18.4351	0.0312153	0.010837
19.0116	0.0348369	0.00930127		18.5058	0.0315854	0.010261		18.3995	0.0315085	0.011653
18.976	0.0336194	0.0104823		18.4702	0.0298003	0.0112775		18.3639	0.0315298	0.0112606
18.9404	0.0331351	0.00883386		18.4345	0.0283894	0.0102426		18.3283	0.0302228	0.0121184
18.9047	0.0315752	0.00993769		18.3989	0.0295273	0.00891489		18.2927	0.0300732	0.011886
18.8691	0.0330409	0.0108661		18.3633	0.0295213	0.0112674		18.257	0.0322888	0.0111948
18.8335	0.0314805	0.00881777		18.3277	0.0308733	0.0105386		18.2214	0.0303414	0.00930594
18.7979	0.0327741	0.00978846		18.2921	0.0295946	0.0108593		18.1858	0.0291089	0.0091978
18.7623	0.0302521	0.00957396		18.2558	0.0302747	0.0104114		18.1502	0.0284974	0.0107202
18.7266	0.0321489	0.00910612		18.2202	0.0293488	0.00990117		18.1145	0.0296519	0.00936994
18.691	0.0289915	0.0104647		18.1846	0.0292096	0.0109711		18.0789	0.0287834	0.00928498
18.6554	0.0308591	0.0108545		18.149	0.0279585	0.00973644		18.0433	0.0277787	0.0092794
18.6198	0.0309981	0.00953223		18.1134	0.0291088	0.009204		18.0077	0.0292686	0.00744691
18.5842	0.03114	0.00967827		18.0777	0.0269884	0.0092285		17.9721	0.0289369	0.009633
18.5485	0.0307649	0.00980861		18.0421	0.0268323	0.0086272		17.9364	0.0273927	0.0102328
18.5129	0.031281	0.0100041		18.0065	0.0268239	0.0101163		17.9008	0.0264614	0.00990957
18.4773	0.03093	0.0104965		17.9709	0.0272732	0.0102788		17.8652	0.0277444	0.010972
18.4417	0.0305501	0.0107334		17.9353	0.0270083	0.0094423		17.8296	0.0266118	0.0107728
18.406	0.030366	0.0110682		17.8996	0.0260502	0.0098577		17.794	0.0256498	0.0101975
18.3704	0.0295781	0.0112784		17.864	0.0270971	0.0100774		17.7583	0.0260434	0.00955812
18.3348	0.028892	0.00975465		17.8284	0.026953	0.0100077		17.7227	0.0231896	0.0100984
18.2992	0.0293018	0.00954888		17.7928	0.0249377	0.009416		17.6871	0.0251148	0.00970646
18.2636	0.027155	0.00965454		17.7566	0.0256939	0.00893978		17.6515	0.0246925	0.00963386
18.2279	0.0304377	0.0096068		17.7209	0.0236954	0.0100174		17.6159	0.0246958	0.00835429
18.1923	0.0284438	0.010836		17.6853	0.0255294	0.00855902		17.5802	0.0252357	0.00878328
18.1567	0.0262297	0.00886595		17.6497	0.0245095	0.00943131		17.5446	0.0242856	0.00899294
18.1211	0.0276217	0.00972671		17.6141	0.0262202	0.00987209		17.509	0.0259769	0.0111311
18.0855	0.0258692	0.0082736		17.5784	0.026023	0.00855634		17.4734	0.0235306	0.00849728
18.0498	0.0274327	0.00852579		17.5428	0.0239896	0.00997845		17.4377	0.0248064	0.0109011
18.0142	0.0260491	0.0083881		17.5072	0.0242223	0.0079695		17.4021	0.0253846	0.00970689
17.9786	0.0270335	0.00707657		17.471	0.0229165	0.00753128		17.3665	0.0233232	0.00849351
17.943	0.0262073	0.00972752		17.4354	0.0233777	0.0080458		17.3309	0.0229202	0.00848462
17.9074	0.026076	0.00973854		17.3992	0.0237753	0.0100507		17.2953	0.0230984	0.0102561
17.8717	0.0241492	0.0090304		17.3635	0.0221016	0.00848164		17.2596	0.0247914	0.0102359
17.8361	0.0245415	0.0086648		17.3279	0.0227661	0.00896105		17.224	0.0233418	0.00885572
17.8005	0.0251446	0.0102283		17.2917	0.0242915	0.00838424		17.1878	0.0232831	0.0108093
17.7649	0.0245946	0.00787882		17.2561	0.0220263	0.0087763		17.1522	0.0241034	0.00850295
17.7292	0.0251238	0.00971425		17.2205	0.0219154	0.00865618		17.1166	0.0226183	0.007966
17.6936	0.0246855	0.00925139		17.1848	0.0233125	0.00941945		17.0809	0.0213646	0.00759977
17.658	0.0246056	0.00930358		17.1492	0.0225	0.00912892		17.0447	0.0220562	0.00834245
17.6224	0.0261286	0.00766266		17.1136	0.0210149	0.00907109		17.0091	0.0232124	0.00957894
17.5868	0.0262124	0.00804417		17.078	0.0212047	0.00970948		16.9735	0.0229985	0.00905133
17.5511	0.0261702	0.00880025		17.0424	0.0216749	0.00877615		16.9379	0.0227448	0.0079451
17.5155	0.0254202	0.00910109		17.0061	0.0201163	0.00769802		16.9022	0.0228168	0.00992994
17.4799	0.0238815	0.00982975		16.9699	0.0204714	0.00803567		16.8666	0.0220529	0.00943973
17.4437	0.0214464	0.00759124		16.9343	0.0216675	0.00936279		16.831	0.0222129	0.0090224
17.4081	0.0238924	0.00735288		16.8981	0.0212166	0.00812386		16.7954	0.0225024	0.00912201
17.3724	0.0234475	0.00850587		16.8625	0.0208293	0.0077106		16.7598	0.0222603	0.00816613
17.3368	0.022412	0.00937058		16.8262	0.0198325	0.00810162		16.7235	0.0213318	0.00844291
17.3012	0.0227486	0.00864791		16.7906	0.0208211	0.00805264		16.6879	0.0197413	0.00819432
17.2656	0.0226104	0.00865597		16.7544	0.0197284	0.0090742		16.6523	0.0220702	0.00942078
17.23	0.0239994	0.00797657		16.7188	0.0204914	0.00877829		16.6167	0.0212226	0.00899956
17.1943	0.0230957	0.00874818		16.6832	0.0207123	0.00884844		16.5811	0.0200857	0.00705218
17.1587	0.0218808	0.00818241		16.647	0.021264	0.00887528		16.5454	0.0201093	0.00829307
17.1231	0.022701	0.00697878		16.6107	0.0206525	0.00892242		16.5086	0.0197934	0.00876146
17.0875	0.0216656	0.00777035		16.5751	0.0197442	0.00855857		16.473	0.0203553	0.00908624
17.0519	0.0234104	0.00999526		16.5395	0.0205175	0.00881952		16.4374	0.0191965	0.00937207
17.0162	0.0221578	0.0079441		16.5039	0.0198418	0.00758436		16.4018	0.0200047	0.00831251
16.9806	0.0223436	0.00871957		16.4683	0.0194581	0.00837197		16.3661	0.0201325	0.00824827
16.9444	0.0219562	0.0092876		16.4326	0.0203084	0.0090133		16.3299	0.0196097	0.00748813
16.9088	0.0213731	0.00870578		16.397	0.020635	0.00822436		16.2937	0.0178362	0.0085576
16.8732	0.0219231	0.00940727		16.3614	0.0203328	0.00910355		16.2575	0.0179802	0.00717943
16.8375	0.0222181	0.0103475		16.3258	0.0194534	0.00877272		16.2219	0.0163034	0.00744708
16.8019	0.0210201	0.00836735		16.2902	0.0200124	0.00841496		16.1863	0.0181845	0.00768695
16.7663	0.0203301	0.00865236		16.2545	0.0181904	0.00782678		16.1506	0.0166037	0.00778075
16.7307	0.0218413	0.00899621		16.2177	0.0185223	0.00855346		16.1144	0.017824	0.00738918
16.695	0.0213385	0.00862731		16.1821	0.0173037	0.00733911		16.0788	0.0179943	0.00911292
16.6594	0.0204179	0.00883646		16.1465	0.0174261	0.00817188		16.0426	0.0187019	0.00875552
16.6238	0.0198384	0.00804237		16.1109	0.0165588	0.00766705		16.0064	0.0180211	0.00922383
16.5882	0.0199009	0.00833626		16.0752	0.0169666	0.00742744		15.9707	0.01777	0.00785681
16.5526	0.0195472	0.00824534		16.039	0.0182186	0.00712142		15.9351	0.0178294	0.00744772
16.5169	0.0203061	0.00793073		16.0022	0.0159854	0.00805913		15.8983	0.0172388	0.00802893
16.4801	0.0211712	0.00703962		15.9666	0.0174062	0.00698717		15.8621	0.0191025	0.0084589
16.4445	0.0200894	0.0087721		15.9304	0.0176134	0.00769863		15.8259	0.0181509	0.00718304
16.4077	0.019906	0.00887694		15.8936	0.0166761	0.0073876		15.7897	0.0163539	0.00841438
16.3721	0.0185353	0.00776515		15.8574	0.0166837	0.00813979		15.7541	0.0186159	0.00912141
16.3365	0.0201122	0.00829287		15.8205	0.0178576	0.00637505		15.7184	0.0165472	0.00707843
16.3002	0.0202034	0.00772667		15.7849	0.0162637	0.00775004		15.6822	0.018627	0.00817664
16.2646	0.0196657	0.00996285		15.7493	0.0161535	0.00774124		15.6466	0.0175228	0.00794561
16.229	0.0202848	0.00916761		15.7137	0.0165638	0.00684446		15.6104	0.0175106	0.00795489
16.1934	0.0194664	0.00847364		15.6781	0.0178427	0.00934595		15.5742	0.0159207	0.0073711
16.1578	0.0185567	0.00720991		15.6424	0.0160239	0.00880641		15.538	0.0161959	0.00912088
16.1221	0.0180591	0.00743538		15.6068	0.0164362	0.00667619		15.5023	0.0174898	0.00728938
16.0865	0.0184869	0.00816088		15.5694	0.0170132	0.00765112		15.4655	0.0157144	0.00697728
16.0497	0.0174881	0.00746297		15.532	0.0150482	0.00753685		15.4299	0.0164196	0.00768914
16.0141	0.0188764	0.00881243		15.4964	0.0161436	0.00758759		15.3943	0.0161941	0.00699837
15.9785	0.016925	0.00766008		15.459	0.0147823	0.00676587		15.3587	0.0158997	0.00777866
15.9428	0.0166903	0.00787774		15.4234	0.015405	0.0086417		15.323	0.0166909	0.00812639
15.9066	0.0170168	0.00876356		15.3866	0.0155276	0.00824076		15.2862	0.0151102	0.00658352
15.8704	0.0171055	0.00685475		15.3503	0.016683	0.00687478		15.2506	0.0149255	0.00707176
15.8336	0.0165473	0.00766522		15.3129	0.0168721	0.00791286		15.215	0.0175015	0.00705013
15.7974	0.0159414	0.00705304		15.2773	0.0159502	0.00727486		15.1788	0.0154321	0.00690418
15.7612	0.0176633	0.0085718		15.2417	0.0163222	0.00738989		15.1431	0.0155516	0.00703565
15.7256	0.0163885	0.00747833		15.2061	0.0156446	0.00749587		15.1063	0.0164974	0.00777372
15.6899	0.0170151	0.00608536		15.1699	0.0149366	0.00851555		15.0707	0.0150112	0.0076353
15.6537	0.0176158	0.00806845		15.1319	0.0157086	0.00672733		15.0351	0.0152776	0.00679743
15.6163	0.0169627	0.00668052		15.0957	0.0144033	0.00713667		14.9995	0.0148112	0.00685021
15.5807	0.0178969	0.00816928		15.0583	0.0148184	0.0067136		14.9633	0.0149287	0.00609527
15.5451	0.0182305	0.00806979		15.022	0.0140005	0.00734222		14.9265	0.0146298	0.00647665
15.5089	0.0158674	0.00631795		14.9858	0.0155143	0.00756513		14.8902	0.014295	0.0073252
15.4721	0.0164028	0.00769045		14.9496	0.0152176	0.00815681		14.8546	0.0131312	0.00526715
15.4364	0.0166239	0.00713452		14.9128	0.0140945	0.00685782		14.8184	0.0140691	0.00613414
15.4008	0.017554	0.00596751		14.8772	0.0135599	0.00613869		14.781	0.0131171	0.00594775
15.3652	0.0155146	0.00629063		14.8404	0.0143125	0.00742211		14.7448	0.0147527	0.00708794
15.329	0.0167458	0.00599821		14.8018	0.0136361	0.00735915		14.7092	0.0154037	0.00670956
15.2934	0.0177246	0.0088056		14.765	0.013857	0.00748605		14.673	0.0144208	0.00689747
15.2577	0.0156549	0.00601384		14.7276	0.0128802	0.0069671		14.6373	0.0141968	0.0067535
15.2215	0.0144254	0.00667431		14.6914	0.0141631	0.0077893		14.6011	0.0137221	0.00721371
15.1847	0.0145328	0.00742687		14.6545	0.0139264	0.00723695		14.5655	0.0132061	0.0077634
15.1479	0.0166767	0.00619322		14.6177	0.0138933	0.00690107		14.5299	0.014324	0.00660648
15.1111	0.0161607	0.00753984		14.5821	0.0124198	0.0071382		14.4937	0.0129907	0.00575041
15.0749	0.0148536	0.00759175		14.5465	0.0147393	0.00765399		14.4574	0.0155084	0.00720105
15.0375	0.0151811	0.00841022		14.5097	0.0161236	0.00718024		14.4206	0.0140072	0.00592376
15.0019	0.0153172	0.00721489		14.4741	0.0131957	0.00653291		14.3844	0.0130184	0.00617254
14.9645	0.0146966	0.00748615		14.4367	0.0132205	0.00753698		14.3488	0.0141075	0.00681434
14.9288	0.014542	0.00818554		14.4004	0.0143476	0.00649847		14.3126	0.0131219	0.00760793
14.8908	0.013585	0.00737395		14.3636	0.0129399	0.00671685		14.2758	0.0151954	0.0076632
14.8534	0.0148825	0.00761598		14.3251	0.0137864	0.00611044		14.239	0.0144166	0.00725607
14.8178	0.0148018	0.00698216		14.2876	0.0119583	0.00701963		14.2028	0.0143038	0.00728589
14.7816	0.0145527	0.00677277		14.2497	0.0127393	0.00710696		14.1653	0.0109829	0.00574868
14.7454	0.0141062	0.00565584		14.2128	0.0127235	0.00683895		14.1274	0.0119808	0.00606037
14.7092	0.0142584	0.00702496		14.176	0.0137442	0.00681763		14.09	0.0137529	0.00610193
14.6706	0.0147795	0.00702711		14.1398	0.0131887	0.00652555		14.0531	0.0119419	0.00616176
14.632	0.0137236	0.00709691		14.0989	0.0124619	0.00722061		14.0157	0.0123051	0.00702244
14.594	0.0133674	0.00707352		14.062	0.0128141	0.00609321		13.9766	0.0133609	0.00548102
14.5578	0.0140426	0.00742837		14.0229	0.0122155	0.0060313		13.9392	0.0132431	0.00723228
14.5192	0.0133086	0.0064381		13.9866	0.012234	0.00610704		13.9029	0.0124612	0.00675802
14.4818	0.0130083	0.00698535		13.9498	0.0126005	0.00752463		13.8655	0.012325	0.0065151
14.4456	0.0138412	0.00662617		13.9113	0.0120566	0.00650425		13.8299	0.0105575	0.00717647
14.4099	0.0140094	0.00726347		13.8733	0.0122274	0.00589147		13.7937	0.0120493	0.00659236
14.3737	0.0135222	0.00616445		13.8359	0.0113165	0.0064875		13.7557	0.01243	0.00614236
14.3375	0.0152497	0.00728215		13.7961	0.0109035	0.0067073		13.7177	0.0116894	0.0059243
14.3001	0.014892	0.00710517		13.7587	0.0122578	0.00678118		13.6797	0.0113291	0.00590203
14.2639	0.0143689	0.00818962		13.7225	0.0121049	0.00704677		13.6417	0.0124169	0.00728254
14.2265	0.0139376	0.00633079		13.6839	0.0115979	0.00682023		13.6055	0.0124741	0.00629476
14.1891	0.0147759	0.00774118		13.6453	0.0118091	0.00676866		13.5687	0.0108595	0.00626631
14.1523	0.0121761	0.00684538		13.6073	0.0128271	0.00589295		13.5325	0.0126557	0.00630745
14.1137	0.0130635	0.00651509		13.5693	0.0120775	0.00616548		13.4957	0.0116658	0.00604194
14.0769	0.0133374	0.00600319		13.5319	0.0115416	0.00696904		13.4589	0.0116622	0.00675616
14.0413	0.0136117	0.00711315		13.4939	0.0110569	0.00595864		13.4197	0.0123296	0.00591415
14.0051	0.0132682	0.00645378		13.4565	0.0129044	0.0050332		13.3835	0.010142	0.00529582
13.9682	0.0124816	0.00744958		13.4179	0.0117552	0.00618471		13.3443	0.0116445	0.00549981
13.9314	0.0136724	0.006143		13.3799	0.0113	0.00547696		13.3075	0.0102927	0.00517706
13.8952	0.013068	0.00691929		13.3401	0.0104668	0.00600127		13.2695	0.0114401	0.00668622
13.856	0.0126877	0.00720875		13.3003	0.0122468	0.00700702		13.2309	0.0110326	0.00569705
13.818	0.0127109	0.00743768		13.2641	0.0109655	0.0062351		13.1929	0.0122529	0.00673663
13.7789	0.0119764	0.00609834		13.2267	0.0116707	0.00566753		13.1543	0.0111256	0.00623009
13.7409	0.0132314	0.00702011		13.1887	0.0111249	0.00596755		13.1133	0.0110983	0.00698817
13.7035	0.0127555	0.00793943		13.1507	0.011959	0.00507964		13.0753	0.0108517	0.00522937
13.6643	0.0140312	0.00679458		13.1133	0.0112444	0.00652439		13.0356	0.0109756	0.00606498
13.6281	0.0129356	0.0063617		13.0742	0.0110637	0.00611316		12.9964	0.0116345	0.00670403
13.5913	0.0131816	0.00663333		13.0356	0.010185	0.0052963		12.9584	0.0117213	0.00630644
13.5544	0.0121247	0.00550406		12.9988	0.00999756	0.00543695		12.9204	0.0108301	0.00641121
13.5153	0.0122235	0.00607829		12.9602	0.0105452	0.00562792		12.8824	0.0113832	0.00545206
13.4785	0.0115805	0.00580449		12.9228	0.0100744	0.00600131		12.8438	0.0111356	0.0064408
13.4416	0.0126388	0.00746449		12.883	0.0119625	0.00592899		12.8058	0.0106614	0.00608068
13.4036	0.0124247	0.00611422		12.8438	0.0110653	0.00577844		12.7678	0.0109637	0.00518325
13.3657	0.0119249	0.00635001		12.804	0.0106451	0.0060872		12.7292	0.0113294	0.00564618
13.3288	0.0122656	0.00680562		12.7654	0.00982486	0.00557548		12.69	0.011632	0.00611054
13.2908	0.0125652	0.00636815		12.7268	0.0103924	0.00650254		12.6491	0.0113847	0.00597916
13.2534	0.011754	0.00673988		12.6894	0.0110002	0.00583583		12.6117	0.0102244	0.00705257
13.2143	0.0135447	0.00658337		12.6497	0.0107142	0.00606038		12.5743	0.0092912	0.00567515
13.1775	0.0114095	0.00633709		12.6087	0.00888355	0.00610406		12.5375	0.0102449	0.00593415
13.1377	0.0111121	0.00539973		12.5689	0.0107384	0.00680174		12.4995	0.0108166	0.00586665
13.1015	0.0121115	0.00629171		12.5315	0.0111327	0.00659792		12.4603	0.00978108	0.00637293
13.0641	0.0124541	0.00742721		12.49	0.00931225	0.0053626		12.4223	0.0110557	0.00598806
13.0255	0.0120124	0.00674329		12.4472	0.0105556	0.00598732		12.3825	0.0090098	0.00522023
12.9887	0.0115843	0.00716448		12.4057	0.0108387	0.00478419		12.3421	0.0092755	0.00529613
12.9495	0.0121485	0.00675531		12.3647	0.00958419	0.00625088		12.3041	0.0100503	0.00557692
12.9133	0.0119345	0.00692666		12.3237	0.0106214	0.00659777		12.2638	0.011551	0.00583029
12.8747	0.0114627	0.00571893		12.2816	0.00953486	0.0051357		12.2252	0.00991626	0.00647162
12.8367	0.0124276	0.00583877		12.2424	0.00896032	0.00510188		12.1836	0.00978092	0.00552804
12.7987	0.0117394	0.00500839		12.2002	0.00947298	0.00572524		12.1438	0.0101055	0.00534548
12.7589	0.0108598	0.00702035		12.1605	0.00971371	0.00609369		12.1041	0.0100714	0.00629651
12.7209	0.0117745	0.00593704		12.1201	0.0100854	0.0050713		12.0667	0.0104819	0.00663862
12.6847	0.0114746	0.00615647		12.0821	0.00904121	0.00519208		12.0293	0.0110889	0.00597641
12.6479	0.0101415	0.00511094		12.0417	0.00922939	0.00553511		11.9919	0.0100579	0.00584444
12.6069	0.00945914	0.00538379		12.002	0.0101546	0.00576019		11.9527	0.00973591	0.00607711
12.5689	0.0122146	0.00691749		11.9574	0.00968363	0.00490588		11.9123	0.00997228	0.00577085
12.5297	0.0103412	0.00603055		11.9123	0.00938131	0.00578407		11.8731	0.0095898	0.00538052
12.4923	0.0103686	0.00579274		11.8731	0.00986667	0.00602034		11.8333	0.00933465	0.00640455
12.4567	0.0116259	0.00696764		11.8333	0.00995662	0.00560901		11.7948	0.0105688	0.00617906
12.4199	0.00993066	0.00504911		11.7948	0.00988365	0.00474044		11.7544	0.00834306	0.00470151
12.3801	0.0109859	0.00510093		11.7532	0.00950882	0.00546187		11.7152	0.00962669	0.00529043
12.3439	0.010399	0.00501093		11.7122	0.00865095	0.00544306		11.6742	0.00985077	0.00538493
12.3041	0.0102308	0.0054756		11.6701	0.00959293	0.00581119		11.6351	0.00943171	0.00623719
12.265	0.0101477	0.00582065		11.6291	0.00904115	0.00502282		11.5947	0.0106152	0.00636404
12.227	0.0104271	0.00687694		11.5858	0.00806236	0.0053119		11.5555	0.00900324	0.00549898
12.1872	0.0102654	0.00744351		11.5401	0.00822052	0.00529745		11.5163	0.00898576	0.00631128
12.1444	0.0105742	0.00676861		11.4955	0.00945983	0.00595655		11.4754	0.0096805	0.00556465
12.1064	0.00909193	0.00575058		11.4534	0.00840361	0.00490362		11.4332	0.00834159	0.0052545
12.0667	0.0109816	0.0063815		11.4095	0.00926819	0.00544006		11.3922	0.00905432	0.00527773
12.0275	0.011477	0.00564242		11.3649	0.00916491	0.00581628		11.3525	0.0104904	0.00563299
11.9871	0.00993182	0.00549837		11.3204	0.00849998	0.00532098		11.3115	0.00956027	0.00487428
11.9497	0.0102773	0.00657037		11.2812	0.00910624	0.00564886		11.2688	0.00860347	0.00516946
11.9082	0.011732	0.00664635		11.2397	0.008052	0.0050524		11.2284	0.00949779	0.00496836
11.8672	0.00975621	0.00601123		11.1975	0.00851208	0.0050546		11.1904	0.00980084	0.00617818
11.8256	0.00983318	0.00562257		11.1548	0.00904515	0.00545237		11.1459	0.0085057	0.00521181
11.7847	0.01017	0.00553839		11.1049	0.00846853	0.00530183		11.1025	0.00848499	0.00573163
11.7455	0.010026	0.00614425		11.061	0.00848971	0.00537734		11.0616	0.00908153	0.00631282
11.7081	0.0100504	0.00561775		11.017	0.00920517	0.00533355		11.0224	0.00857993	0.00621866
11.6671	0.00974176	0.0060495		10.9713	0.00878117	0.00474442		10.9814	0.00871828	0.00540757
11.6262	0.00992179	0.00600967		10.9292	0.00848904	0.00532784		10.9393	0.00943407	0.00529266
11.5876	0.0111399	0.00585041		10.8882	0.0100746	0.00626548		10.8989	0.00882327	0.00474627
11.5472	0.0105499	0.0056673		10.8466	0.0104134	0.00536699		10.8573	0.00742753	0.00490509
11.505	0.0113644	0.00532701		10.8039	0.00898624	0.00510749		10.8164	0.00863453	0.00514767
11.4653	0.00880317	0.00624514		10.7606	0.00920945	0.00524046		10.7742	0.00969715	0.00549063
11.4261	0.00977819	0.0060391		10.7202	0.00884612	0.00556664		10.7321	0.00949198	0.00579687
11.3881	0.0104331	0.0059211		10.6715	0.00863398	0.00648836		10.6858	0.00975538	0.00596087
11.3489	0.0107714	0.00594676		10.6282	0.00942345	0.00536708		10.6418	0.00879409	0.00530813
11.3079	0.00965875	0.00575901		10.5854	0.00783705	0.00501411		10.5961	0.00894799	0.00489739
11.2699	0.00949278	0.00577429		10.5427	0.00792759	0.00486166		10.551	0.00745704	0.00482117
11.2331	0.00892055	0.00591539		10.5035	0.00839588	0.0049235		10.5094	0.00805744	0.00459556
11.1963	0.0102726	0.00564729		10.4631	0.00803142	0.00528035		10.4661	0.00766596	0.00517016
11.1548	0.00876345	0.00473048		10.4204	0.00826199	0.00529428		10.4239	0.00764959	0.00496575
11.1162	0.00985633	0.0049648		10.377	0.00939929	0.0050833		10.3782	0.00769227	0.00530615
11.0728	0.00982458	0.00513958		10.3343	0.00824693	0.005209		10.3337	0.00782543	0.00493878
11.0331	0.00962859	0.0056993		10.2904	0.00653271	0.00501213		10.291	0.00856892	0.00554123
10.9915	0.00958365	0.00547674		10.2494	0.00933721	0.00513251		10.25	0.00757725	0.00499487
10.9488	0.00877642	0.00547575		10.2013	0.007717	0.00493687		10.2072	0.00904989	0.00562987
10.9108	0.00933041	0.00537361		10.158	0.00866768	0.00549087		10.1645	0.00892488	0.00502722
10.8686	0.00880512	0.00508511		10.1146	0.00771165	0.0045979		10.1253	0.00983052	0.00493129
10.8259	0.00934937	0.00579589		10.0737	0.00779255	0.00448156		10.0844	0.00780892	0.00504218
10.7843	0.00890131	0.00576072		10.0274	0.00724294	0.00428677		10.0452	0.00778695	0.0045045
10.7427	0.00924388	0.0052738		9.98105	0.00827846	0.00423377		10.003	0.00818784	0.00526325
10.7006	0.0102519	0.00558803		9.93534	0.00648134	0.00412316		9.96205	0.00854187	0.00529573
10.6579	0.00901815	0.00517911		9.89259	0.00718995	0.00462379		9.92287	0.00758915	0.00448285
10.6151	0.0100589	0.00576853		9.85163	0.00799679	0.00489151		9.88131	0.00844927	0.00519628
10.573	0.00852974	0.00552736		9.80829	0.00748161	0.00515917		9.83263	0.00719099	0.00452461
10.532	0.00994072	0.00530276		9.76673	0.0088406	0.00468785		9.79107	0.0082367	0.00554166
10.4922	0.00899967	0.00580021		9.72161	0.00734371	0.0051149		9.74536	0.00864341	0.00509348
10.4501	0.00900943	0.00583973		9.67233	0.00697222	0.0045486		9.7038	0.00736827	0.00463995
10.4085	0.00894197	0.00555759		9.62781	0.00737874	0.00439211		9.66046	0.00721583	0.00457222
10.3658	0.00818452	0.00551018		9.58031	0.00733909	0.0042358		9.61356	0.00810701	0.00455997
10.3278	0.00925462	0.00544476		9.5346	0.00755238	0.00506294		9.56784	0.00761802	0.00500617
10.285	0.00907985	0.00596866		9.48888	0.00842912	0.00588135		9.52035	0.0084846	0.00443821
10.2441	0.00892308	0.00570336		9.44258	0.00750156	0.00420631		9.4776	0.00681549	0.00471037
10.2019	0.00837929	0.00547789		9.39271	0.00757872	0.00474589		9.43308	0.00745764	0.0047895
10.1597	0.00817331	0.00549821		9.34343	0.00932387	0.00544688		9.39152	0.00761175	0.00509455
10.1164	0.00994398	0.00573077		9.29772	0.00665131	0.00486086		9.34759	0.00747875	0.00480689
10.0725	0.0080274	0.0050211		9.25082	0.00759396	0.00533162		9.30662	0.00817605	0.00460573
10.0285	0.00850156	0.0050743		9.20688	0.00732589	0.00441458		9.25853	0.00766751	0.00518042
9.98936	0.00848159	0.00495472		9.16354	0.00763378	0.00478641		9.20629	0.00799138	0.00451671
9.94365	0.00864884	0.00540017		9.11783	0.00699415	0.00484357		9.1582	0.00705896	0.00518194
9.90328	0.00956153	0.00632607		9.07508	0.00746935	0.00463557		9.11546	0.00716215	0.00427957
9.8635	0.00868144	0.00530723		9.027	0.00691826	0.00474742		9.06974	0.0069596	0.0041501
9.82194	0.00836908	0.00508963		8.98544	0.00796771	0.00571232		9.02047	0.00657954	0.00477949
9.77979	0.00877406	0.00548939		8.93794	0.00711149	0.00508771		8.97772	0.00769347	0.0059974
9.73823	0.00858032	0.00570024		8.89104	0.00731081	0.00490442		8.93201	0.00640029	0.00478615
9.69549	0.00894235	0.00652654		8.85067	0.00695235	0.00415801		8.89104	0.00679717	0.00500801
9.65333	0.00774686	0.00577163		8.80614	0.00701957	0.00483742		8.84652	0.00774672	0.00434804
9.61178	0.00862731	0.00551936		8.76102	0.00766221	0.00417387		8.79605	0.00750189	0.0048539
9.5625	0.00751808	0.00482659		8.71294	0.00779952	0.00463962		8.75034	0.00706079	0.00431399
9.50966	0.00832478	0.00561974		8.66663	0.00737482	0.00454888		8.70284	0.00798548	0.00472327
9.46514	0.00798223	0.00588407		8.62329	0.0079479	0.00551344		8.66188	0.00815075	0.00535858
9.42358	0.00740077	0.00473687		8.57579	0.0069429	0.00450315		8.61438	0.00725069	0.00505921
9.37727	0.00753113	0.00555228		8.53067	0.00766722	0.00414524		8.56926	0.00709181	0.00449902
9.33631	0.00762031	0.00479698		8.48377	0.00772149	0.00613071		8.52593	0.00798762	0.00538084
9.29297	0.00801896	0.00560098		8.43747	0.00760674	0.00504907		8.47962	0.0083794	0.00629014
9.24666	0.00775296	0.00499695		8.39591	0.00747985	0.00488011		8.42975	0.00760353	0.00550689
9.1962	0.0090111	0.00519137		8.35079	0.00677664	0.00477776		8.38522	0.00718068	0.00526414
9.15048	0.00704061	0.00489099		8.30567	0.00740015	0.00507119		8.3401	0.00631384	0.00435082
9.10952	0.00841862	0.00510163		8.25224	0.00816098	0.00566005		8.29023	0.00710834	0.00491597
9.0644	0.00840463	0.0052955		8.20296	0.0069874	0.00429923		8.23977	0.00666235	0.00461607
9.01453	0.00832616	0.00537324		8.15546	0.00825474	0.00490669		8.19465	0.00657781	0.0047706
8.96703	0.0079715	0.004865		8.10203	0.0073053	0.0046928		8.14715	0.00736413	0.00434437
8.91657	0.007128	0.00483418		8.05216	0.00731863	0.00426128		8.09491	0.00789952	0.00466107
8.86848	0.00810093	0.00530161		8.01061	0.00641294	0.00417277		8.04682	0.0069156	0.00438507
8.82217	0.00684588	0.00493452		7.95895	0.00697147	0.00512651		8.00051	0.00840576	0.00458613
8.77587	0.00784664	0.00513357		7.91027	0.00753775	0.00478781		7.9548	0.0066222	0.00429366
8.73193	0.00856939	0.00549896		7.86278	0.00776117	0.00472235		7.90374	0.00577821	0.00404658
8.68503	0.00858191	0.00481352		7.81647	0.00683975	0.00427078		7.85625	0.0063979	0.00408427
8.63754	0.007514	0.00491341		7.76838	0.00693098	0.00481891		7.80519	0.00676621	0.00522656
8.5942	0.008595	0.00556021		7.71732	0.00670207	0.00510604		7.75176	0.00651336	0.00489351
8.54849	0.00870075	0.00510132		7.67399	0.007757	0.00479718		7.69892	0.00683871	0.00448993
8.49862	0.00782314	0.00490487		7.62471	0.00651983	0.00481447
8.44993	0.00746695	0.00585401		7.58078	0.0070711	0.0039737
8.40541	0.00873751	0.00543648		7.53328	0.00617615	0.00434726
8.36147	0.0074324	0.00569387		7.48223	0.00743605	0.00470234
8.30864	0.00684141	0.0044719		7.42998	0.00763687	0.00435214
8.26114	0.00776497	0.00486137		7.38249	0.00694617	0.00463538
8.21305	0.00701785	0.00440381		7.3338	0.00715234	0.00488152
8.16437	0.0078652	0.00480409		7.28453	0.00700128	0.0043182
8.11925	0.00706093	0.0048203		7.23525	0.00675426	0.00471663
8.07354	0.00802295	0.005031		7.18419	0.00724036	0.00445596
8.02842	0.00795045	0.00491086		7.13789	0.00665931	0.00513002
7.98389	0.00812164	0.00477731		7.09158	0.00692616	0.00467266
7.93758	0.00648531	0.00442028		7.04112	0.00724797	0.00461303
7.89246	0.00759805	0.00442664		6.99184	0.00692283	0.00421111
7.84615	0.00732609	0.00415001		6.94256	0.00701379	0.00421477
7.79569	0.00793696	0.00534966		6.89032	0.00731245	0.00490869
7.74998	0.00798256	0.00461295		6.83867	0.00678768	0.00514933
7.69951	0.00797342	0.00496885		6.78761	0.00670907	0.00367893
7.65321	0.00689764	0.00447227		6.73656	0.00675818	0.0047801
7.60868	0.00732234	0.0049089		6.68609	0.00677431	0.00464863
7.5594	0.00767704	0.00567544		6.64157	0.00642704	0.00460209
7.50953	0.00782802	0.00475188		6.58338	0.00717475	0.00581008
7.46085	0.00694853	0.00522424		6.5353	0.0074236	0.00485557
7.40801	0.00701	0.00492297		6.47474	0.00782867	0.00498464
7.36349	0.00730598	0.00523025		6.41656	0.00580323	0.00438056
7.31184	0.00799077	0.004414		6.36313	0.00678849	0.00380266
7.26434	0.00743619	0.00541652		6.31207	0.00638802	0.00372531
7.21269	0.00668216	0.00494881		6.26042	0.0066744	0.00507245
7.1652	0.00779979	0.00427764		6.21055	0.0063316	0.00477404
7.11473	0.00643146	0.00500976		6.16068	0.00728456	0.00423567
7.06902	0.00665559	0.00390637		6.10428	0.00662732	0.00495436
7.01737	0.00774699	0.00546588		6.05619	0.00597657	0.00365246
6.96512	0.00664506	0.0040315		6.00395	0.00683978	0.0047888
6.91229	0.0075052	0.00543408		5.95467	0.00648718	0.0044592
6.8636	0.00683403	0.00508303		5.91371	0.00699209	0.00517713
6.81195	0.00726658	0.00473156		5.85553	0.00727038	0.00438911
6.76743	0.00712868	0.00511778		5.80387	0.00700971	0.00481291
6.71815	0.00615238	0.00457115		5.74985	0.00761283	0.00453902
6.66888	0.00780248	0.00498448		5.69879	0.00643108	0.00439271
6.62257	0.00719118	0.00448194		5.64952	0.00705766	0.00449107
6.57626	0.00654783	0.00422049		5.59727	0.00622823	0.00399629
6.52461	0.00628577	0.00456808		5.54147	0.00657448	0.00438926
6.47652	0.00731373	0.00457133		5.48507	0.00689053	0.00425161
6.43081	0.00634013	0.00499807		5.43579	0.00670207	0.0040366
6.38509	0.00621174	0.00369438		5.38354	0.00696875	0.00407447
6.34057	0.00771244	0.00479694		5.33189	0.00718047	0.00549367
6.29129	0.00725908	0.00487406		5.27906	0.00621465	0.00529431
6.24142	0.00664819	0.004202		5.23275	0.00551227	0.0040778
6.18918	0.00732794	0.00454456		5.18229	0.00673846	0.00481105
6.13396	0.00746319	0.00518518		5.12826	0.00478331	0.00454854
6.07994	0.00765595	0.00447062		5.07483	0.00712384	0.00508158
6.02888	0.00731911	0.00538507		5.02733	0.00675822	0.0051528
5.97723	0.00602981	0.00438489
5.92914	0.00727204	0.00429873
5.88105	0.00710609	0.00490754

## Sheet: Figure 6 (b)
	SVF (ppm)				SVF (ppm)				SVF (ppm)
Flame height (mm)	n-heptane	standard deviation		Flame height (mm)	n-heptane-FM100	standard deviation		Flame height (mm)	n-heptane-FM500	standard deviation
41.5598	0.0448658	0.00481005		41.5539	0.0444174	0.00368487		41.8138	0.0442229	0.00401898
41.5242	0.0368489	0.00951831		41.5177	0.0408824	0.00790307		41.7776	0.0394154	0.00933523
41.4886	0.0391226	0.010605		41.4815	0.0412198	0.00961859		41.7415	0.0412252	0.0110503
41.4529	0.042197	0.0118094		41.4453	0.0424388	0.0101275		41.7053	0.0425488	0.00948612
41.4173	0.0436073	0.0138872		41.4091	0.0447291	0.00966998		41.6691	0.0430402	0.011219
41.3817	0.0454052	0.0138925		41.3729	0.0468062	0.0107639		41.6329	0.0451766	0.00980661
41.3461	0.0498337	0.0146139		41.3368	0.0492868	0.0120723		41.5967	0.047607	0.00990431
41.3105	0.0524683	0.0140143		41.3006	0.052054	0.0121503		41.5605	0.0480677	0.0108492
41.2748	0.0564715	0.0159272		41.2644	0.0538192	0.0112859		41.5243	0.0505968	0.012379
41.2392	0.0601948	0.0174038		41.2282	0.0584551	0.0143365		41.4881	0.0536262	0.0118795
41.2036	0.0625908	0.0177647		41.192	0.0610251	0.0117697		41.452	0.0556712	0.012341
41.168	0.0672993	0.0173401		41.1558	0.0634251	0.0137587		41.4158	0.0598539	0.0121962
41.1323	0.0720824	0.0193871		41.1196	0.0664183	0.0131162		41.3796	0.0631603	0.0137304
41.0967	0.0759708	0.0174475		41.0834	0.0707597	0.0138568		41.3434	0.0656241	0.0126197
41.0611	0.080522	0.0197054		41.0473	0.0721356	0.0156244		41.3072	0.0661898	0.012798
41.0255	0.0841392	0.0232156		41.0111	0.0786102	0.0135687		41.271	0.0726428	0.0119842
40.9899	0.0888633	0.0239477		40.9749	0.0810035	0.0127465		41.2348	0.0744436	0.0124651
40.9542	0.0921404	0.0196137		40.9387	0.0850548	0.0150624		41.1986	0.0775813	0.0137587
40.9186	0.0967999	0.0230416		40.9025	0.0894692	0.0178577		41.1624	0.0813032	0.0163489
40.883	0.102139	0.0231507		40.8663	0.0940941	0.01803		41.1263	0.0811203	0.0148078
40.8474	0.10792	0.0264431		40.8301	0.0987278	0.019637		41.0901	0.0846895	0.0127134
40.8118	0.114344	0.0244963		40.7939	0.100517	0.017401		41.0539	0.092221	0.0149071
40.7761	0.123001	0.0279271		40.7577	0.105598	0.0176093		41.0177	0.093909	0.0160703
40.7405	0.125449	0.0276812		40.7216	0.110711	0.0195762		40.9815	0.0979639	0.0156038
40.7049	0.131819	0.0290579		40.6854	0.115799	0.0199685		40.9453	0.102887	0.0179454
40.6693	0.141583	0.0336576		40.6492	0.117956	0.0200067		40.9091	0.106657	0.0176445
40.6337	0.146647	0.0313576		40.613	0.124377	0.0197387		40.8729	0.109314	0.0193722
40.598	0.149066	0.0352031		40.5768	0.128719	0.0175732		40.8368	0.115296	0.0206084
40.5624	0.15661	0.0342141		40.5406	0.13125	0.0197543		40.8006	0.120362	0.0205204
40.5268	0.164254	0.0347195		40.5044	0.141733	0.0208985		40.7644	0.124565	0.0219455
40.4912	0.173628	0.0359874		40.4682	0.144503	0.0201175		40.7282	0.128679	0.0215867
40.4555	0.178749	0.0371893		40.4321	0.150896	0.0232444		40.692	0.134758	0.0244348
40.4199	0.187183	0.0362891		40.3959	0.156206	0.0241292		40.6558	0.139686	0.0222166
40.3843	0.197386	0.0413585		40.3597	0.16273	0.0240285		40.6196	0.14453	0.0238073
40.3487	0.204394	0.0434656		40.3235	0.167534	0.022308		40.5834	0.146099	0.0218012
40.3131	0.214444	0.0449066		40.2873	0.173724	0.0243637		40.5473	0.150344	0.0234356
40.2774	0.223585	0.0421052		40.2511	0.1785	0.0247844		40.5111	0.157261	0.0242815
40.2418	0.230927	0.0489429		40.2149	0.186026	0.0261365		40.4749	0.160853	0.0263552
40.2062	0.239722	0.043709		40.1787	0.191363	0.0256077		40.4387	0.16762	0.0273538
40.1706	0.245441	0.0445849		40.1426	0.199721	0.0277453		40.4025	0.173839	0.0297862
40.135	0.254122	0.0471128		40.1064	0.205361	0.0288536		40.3663	0.177366	0.0303412
40.0993	0.264978	0.04696		40.0702	0.21283	0.0277439		40.3301	0.184185	0.0286285
40.0637	0.274804	0.047639		40.034	0.218466	0.030282		40.2939	0.190225	0.028588
40.0281	0.286168	0.0531046		39.9978	0.225759	0.0296885		40.2578	0.19283	0.0319559
39.9925	0.299659	0.0552961		39.9616	0.233683	0.0289287		40.2216	0.198629	0.0331664
39.9569	0.308524	0.0558415		39.9254	0.240581	0.0333759		40.1854	0.208076	0.0335293
39.9212	0.31519	0.0550129		39.8892	0.243763	0.0329194		40.1492	0.209843	0.033921
39.8856	0.328915	0.0542054		39.8531	0.254014	0.0346338		40.113	0.218734	0.0327011
39.85	0.335095	0.0565937		39.8169	0.259585	0.0350349		40.0768	0.224095	0.0336013
39.8144	0.344504	0.0641301		39.7807	0.270218	0.0348556		40.0406	0.229738	0.0344376
39.7787	0.356407	0.0617036		39.7445	0.277748	0.0361909		40.0044	0.233292	0.0353362
39.7431	0.364946	0.061454		39.7083	0.285137	0.0364789		39.9683	0.237592	0.0365924
39.7075	0.374044	0.0641777		39.6721	0.292177	0.037886		39.9321	0.247433	0.037445
39.6719	0.386797	0.062893		39.6359	0.297832	0.0404815		39.8959	0.255029	0.0387288
39.6363	0.397611	0.0690951		39.5997	0.305133	0.0387373		39.8597	0.266879	0.0431135
39.6006	0.412625	0.0733427		39.5636	0.312985	0.0370858		39.8235	0.270631	0.0402213
39.565	0.419439	0.0667193		39.5274	0.320544	0.0379689		39.7873	0.280228	0.0402548
39.5294	0.431216	0.0663432		39.4912	0.330477	0.0353479		39.7511	0.287667	0.0407879
39.4938	0.443071	0.0689039		39.455	0.33791	0.0334346		39.7149	0.290479	0.0389048
39.4582	0.449473	0.0704956		39.4188	0.346419	0.0413483		39.6787	0.297491	0.0415045
39.4225	0.464528	0.0647083		39.3826	0.354921	0.0407033		39.6426	0.304176	0.0427368
39.3869	0.472612	0.0699593		39.3464	0.362603	0.0424303		39.6064	0.308635	0.0424563
39.3513	0.48913	0.0630016		39.3102	0.371562	0.0380162		39.5702	0.317395	0.0427544
39.3157	0.502822	0.0687127		39.274	0.381814	0.0399708		39.534	0.325369	0.0485456
39.28	0.513153	0.0754693		39.2379	0.385418	0.0383993		39.4978	0.333571	0.04648
39.2444	0.527255	0.0759984		39.2017	0.39296	0.040056		39.4616	0.340335	0.0482651
39.2088	0.539773	0.0794299		39.1655	0.400808	0.0382209		39.4254	0.352451	0.0498083
39.1732	0.55294	0.0818247		39.1293	0.40929	0.0371968		39.3892	0.35582	0.0467021
39.1376	0.561501	0.0788504		39.0931	0.419826	0.0377328		39.3531	0.365815	0.0474297
39.1019	0.569899	0.0763759		39.0569	0.425424	0.0415207		39.3169	0.374494	0.0498088
39.0663	0.578732	0.0757024		39.0207	0.434696	0.0426425		39.2807	0.378645	0.0469497
39.0307	0.587843	0.0786557		38.9845	0.442852	0.0378652		39.2445	0.386562	0.0479895
38.9951	0.601534	0.073942		38.9484	0.451268	0.0402652		39.2083	0.393396	0.0507743
38.9595	0.611217	0.0792911		38.9122	0.463863	0.0405435		39.1721	0.399937	0.0491907
38.9238	0.630114	0.0828008		38.876	0.465758	0.0400334		39.1359	0.406135	0.0520265
38.8882	0.641888	0.0871486		38.8398	0.477737	0.0414428		39.0997	0.415208	0.0483904
38.8526	0.646435	0.0806717		38.8036	0.485111	0.0409094		39.0636	0.423682	0.0489695
38.817	0.654722	0.0840547		38.7674	0.496374	0.0398518		39.0274	0.428227	0.05113
38.7814	0.665155	0.0820519		38.7312	0.500805	0.0416928		38.9912	0.43701	0.0496374
38.7457	0.682607	0.0837741		38.695	0.506668	0.0408591		38.955	0.446486	0.0491679
38.7101	0.692654	0.0846728		38.6589	0.517314	0.0408665		38.9188	0.450027	0.0485677
38.6745	0.706447	0.0841572		38.6227	0.525026	0.04042		38.8826	0.46294	0.0513891
38.6389	0.715513	0.082065		38.5865	0.53698	0.0411168		38.8464	0.467657	0.0545032
38.6032	0.726437	0.0843336		38.5503	0.541471	0.0397782		38.8102	0.470114	0.0574578
38.5676	0.739681	0.0838111		38.5141	0.549582	0.0398983		38.7741	0.479251	0.0611756
38.532	0.753501	0.0885249		38.4779	0.559071	0.0405777		38.7379	0.491003	0.0606509
38.4964	0.762651	0.0868932		38.4417	0.561181	0.0398294		38.7017	0.500516	0.0607062
38.4608	0.771244	0.0835209		38.4055	0.578384	0.0404792		38.6655	0.512434	0.0642922
38.4251	0.779412	0.0818594		38.3694	0.586654	0.0427043		38.6293	0.514182	0.0625495
38.3895	0.794012	0.078071		38.3332	0.592979	0.0394435		38.5931	0.524268	0.0589982
38.3539	0.806023	0.0762153		38.297	0.610068	0.0424219		38.5569	0.530035	0.0658438
38.3183	0.820562	0.0861191		38.2608	0.61217	0.0434513		38.5207	0.53643	0.0643949
38.2827	0.827454	0.0858988		38.2246	0.622043	0.0449662		38.4846	0.549034	0.0634472
38.247	0.838657	0.0921066		38.1884	0.630766	0.0462537		38.4484	0.556725	0.0626976
38.2114	0.852585	0.0877649		38.1522	0.63826	0.0445456		38.4122	0.571877	0.0671326
38.1758	0.860482	0.0871171		38.116	0.640474	0.0483775		38.376	0.5774	0.0676985
38.1402	0.873373	0.091408		38.0798	0.650354	0.0469397		38.3398	0.585615	0.0639638
38.1046	0.884476	0.0883312		38.0437	0.659934	0.0491717		38.3036	0.588945	0.064919
38.0689	0.890351	0.092028		38.0075	0.665238	0.046628		38.2674	0.595977	0.069676
38.0333	0.897829	0.0885984		37.9713	0.674408	0.0502812		38.2312	0.601514	0.0716865
37.9977	0.911559	0.089142		37.9351	0.681737	0.0476707		38.195	0.611272	0.0726643
37.9621	0.920689	0.096225		37.8989	0.686132	0.0517764		38.1589	0.617358	0.0640252
37.9264	0.92702	0.093565		37.8627	0.69517	0.0499272		38.1227	0.627355	0.0677645
37.8908	0.937549	0.0942358		37.8265	0.699358	0.0535922		38.0865	0.630546	0.0697084
37.8552	0.94784	0.097706		37.7903	0.702965	0.0521915		38.0503	0.639098	0.073996
37.8196	0.956206	0.0934297		37.7542	0.715443	0.0514516		38.0141	0.64621	0.0755111
37.784	0.966642	0.0896161		37.718	0.726491	0.0549722		37.9779	0.652948	0.0745984
37.7483	0.983669	0.0948593		37.6818	0.734625	0.0518027		37.9417	0.660072	0.0692928
37.7127	0.991947	0.0976062		37.6456	0.745889	0.0520883		37.9055	0.668702	0.0735804
37.6771	0.995716	0.0941238		37.6094	0.755127	0.0555235		37.8694	0.672824	0.0691342
37.6415	1.00677	0.0982377		37.5732	0.768478	0.0561882		37.8332	0.683601	0.0741189
37.6059	1.01936	0.0973078		37.537	0.768213	0.0618179		37.797	0.692783	0.0692513
37.5702	1.02194	0.092078		37.5008	0.775295	0.0547888		37.7608	0.698508	0.0697017
37.5346	1.03223	0.101272		37.4647	0.781376	0.0539218		37.7246	0.70702	0.0682363
37.499	1.04631	0.0992084		37.4285	0.791499	0.0529345		37.6884	0.715898	0.0648145
37.4634	1.06073	0.0961556		37.3923	0.803931	0.0538349		37.6522	0.715147	0.0658553
37.4277	1.07321	0.104075		37.3561	0.81016	0.0539565		37.616	0.728699	0.0661226
37.3921	1.07733	0.104465		37.3199	0.821391	0.0585597		37.5799	0.733484	0.0608174
37.3565	1.09191	0.109478		37.2837	0.821369	0.0613663		37.5437	0.735675	0.0688414
37.3209	1.10579	0.110026		37.2475	0.823228	0.0590624		37.5075	0.750266	0.0665176
37.2853	1.10722	0.116203		37.2113	0.824731	0.0526013		37.4713	0.760312	0.0665851
37.2496	1.11232	0.108584		37.1752	0.833699	0.0592299		37.4351	0.7673	0.069742
37.214	1.11087	0.114442		37.139	0.836408	0.0575742		37.3989	0.767498	0.0667499
37.1784	1.12349	0.109811		37.1028	0.850001	0.0566899		37.3627	0.778313	0.0706381
37.1428	1.13181	0.115381		37.0666	0.861698	0.0555838		37.3265	0.785	0.0701295
37.1072	1.14401	0.111772		37.0304	0.866626	0.0579176		37.2904	0.793036	0.0673755
37.0715	1.15463	0.116593		36.9942	0.866562	0.0545848		37.2542	0.798832	0.0657973
37.0359	1.16294	0.122082		36.958	0.879021	0.0648707		37.218	0.810443	0.0682693
37.0003	1.17814	0.128293		36.9218	0.881372	0.0659368		37.1818	0.810308	0.0676809
36.9647	1.18297	0.129466		36.8857	0.890529	0.0705848		37.1456	0.82801	0.0676856
36.9291	1.19655	0.122048		36.8495	0.904665	0.0586352		37.1094	0.828534	0.06767
36.8934	1.19473	0.130716		36.8133	0.906677	0.0568637		37.0732	0.832261	0.0669528
36.8578	1.20587	0.120244		36.7771	0.913866	0.0588573		37.037	0.835419	0.0660625
36.8222	1.21771	0.117754		36.7409	0.91681	0.0576377		37.0008	0.837207	0.0654294
36.7866	1.2144	0.126939		36.7047	0.920998	0.0644349		36.9647	0.848521	0.0640235
36.7509	1.22286	0.125052		36.6685	0.928044	0.0615223		36.9285	0.859355	0.0627146
36.7153	1.23535	0.127427		36.6323	0.939208	0.0637417		36.8923	0.867056	0.062885
36.6797	1.23916	0.124803		36.5961	0.942556	0.0630311		36.8561	0.870472	0.0648459
36.6441	1.25107	0.124864		36.56	0.950259	0.0616563		36.8199	0.881479	0.0604423
36.6085	1.25696	0.135596		36.5238	0.955598	0.0654686		36.7837	0.881591	0.0612912
36.5728	1.26408	0.120985		36.4876	0.960906	0.0643245		36.7475	0.889832	0.0633021
36.5372	1.26217	0.132076		36.4514	0.969072	0.0624817		36.7113	0.892346	0.0662631
36.5016	1.27148	0.136135		36.4152	0.973762	0.0647678		36.6752	0.905962	0.0649969
36.466	1.27698	0.136205		36.379	0.982819	0.0682509		36.639	0.915157	0.0637591
36.4304	1.28272	0.132899		36.3428	0.981106	0.0685353		36.6028	0.912973	0.0699887
36.3947	1.29005	0.144795		36.3066	0.991554	0.0749595		36.5666	0.925249	0.0669847
36.3591	1.30515	0.126805		36.2705	0.994506	0.068117		36.5304	0.928129	0.0663897
36.3235	1.31342	0.122838		36.2343	0.998831	0.070934		36.4942	0.932882	0.0713591
36.2879	1.31674	0.119809		36.1981	1.00253	0.0698875		36.458	0.937384	0.0673389
36.2523	1.32209	0.119066		36.1619	1.00209	0.0689375		36.4218	0.941493	0.0693972
36.2166	1.32809	0.139422		36.1257	1.00824	0.0737263		36.3857	0.951087	0.0711036
36.181	1.33791	0.139792		36.0895	1.01154	0.06953		36.3495	0.951792	0.0749819
36.1454	1.33955	0.138494		36.0533	1.01612	0.0733381		36.3133	0.954065	0.0687794
36.1098	1.34956	0.136927		36.0171	1.03017	0.072067		36.2771	0.954073	0.0722345
36.0741	1.34396	0.131432		35.981	1.02797	0.0764506		36.2409	0.956107	0.0761554
36.0385	1.34832	0.139276		35.9448	1.03312	0.0751309		36.2047	0.967308	0.0734761
36.0029	1.35338	0.136016		35.9086	1.04006	0.0778547		36.1685	0.972406	0.0779373
35.9673	1.35949	0.138641		35.8724	1.04721	0.0772102		36.1323	0.979906	0.0739361
35.9317	1.36716	0.144002		35.8362	1.05125	0.0846766		36.0962	0.986718	0.072523
35.896	1.37513	0.139027		35.8	1.0498	0.076518		36.06	0.998433	0.0793648
35.8604	1.37696	0.140857		35.7638	1.058	0.0756791		36.0238	0.994154	0.0820233
35.8248	1.37289	0.144046		35.7276	1.06486	0.0817472		35.9876	0.998387	0.0753037
35.7892	1.38588	0.144597		35.6915	1.06192	0.0788796		35.9514	1.00138	0.0788717
35.7536	1.39217	0.151563		35.6553	1.06729	0.0805985		35.9152	1.00808	0.0764379
35.7179	1.39001	0.158039		35.6191	1.05772	0.0817014		35.879	1.00917	0.0785061
35.6823	1.39471	0.151108		35.5829	1.06025	0.0891149		35.8428	1.01717	0.083049
35.6467	1.40362	0.145782		35.5467	1.07021	0.0925163		35.8067	1.01426	0.0868023
35.6111	1.39768	0.144377		35.5105	1.06851	0.0918425		35.7705	1.01934	0.0842036
35.5754	1.40538	0.152292		35.4743	1.06957	0.085664		35.7343	1.02753	0.0871026
35.5398	1.40281	0.142288		35.4381	1.07169	0.0887786		35.6981	1.03343	0.0853159
35.5042	1.40295	0.146696		35.402	1.08265	0.0840338		35.6619	1.0359	0.0905593
35.4686	1.41226	0.149639		35.3658	1.08738	0.0853305		35.6257	1.04672	0.0895905
35.433	1.40685	0.158007		35.3296	1.08824	0.0850923		35.5895	1.05133	0.0878032
35.3973	1.41195	0.160601		35.2934	1.08704	0.0870931		35.5533	1.05012	0.093117
35.3617	1.42074	0.160802		35.2572	1.07815	0.089186		35.5171	1.05426	0.0884994
35.3261	1.42382	0.155233		35.221	1.08707	0.0947907		35.481	1.06059	0.0944623
35.2905	1.43293	0.159626		35.1848	1.08307	0.0889328		35.4448	1.0558	0.096878
35.2549	1.42956	0.163602		35.1486	1.09255	0.0884037		35.4086	1.05765	0.093337
35.2192	1.42872	0.166919		35.1124	1.09394	0.0828886		35.3724	1.05461	0.0921043
35.1836	1.43424	0.165026		35.0763	1.09583	0.0853296		35.3362	1.05933	0.0888838
35.148	1.44315	0.171498		35.0401	1.10631	0.0923597		35.3	1.05831	0.0903605
35.1124	1.44099	0.176472		35.0039	1.10383	0.0956836		35.2638	1.06307	0.0914752
35.0768	1.44831	0.17512		34.9677	1.10203	0.0968832		35.2276	1.06828	0.0946113
35.0411	1.45038	0.175187		34.9315	1.10516	0.0953514		35.1915	1.07021	0.0971374
35.0055	1.45697	0.177567		34.8953	1.10917	0.090341		35.1553	1.07478	0.100987
34.9699	1.44993	0.178205		34.8591	1.11563	0.0954673		35.1191	1.07424	0.102482
34.9343	1.46127	0.17641		34.8229	1.11842	0.0946663		35.0829	1.07796	0.0973322
34.8986	1.46585	0.183677		34.7868	1.10701	0.0878418		35.0467	1.07679	0.0957044
34.863	1.46331	0.175064		34.7506	1.1127	0.093459		35.0105	1.07497	0.096807
34.8274	1.4553	0.178645		34.7144	1.10865	0.0908987		34.9743	1.08408	0.10147
34.7918	1.46229	0.175379		34.6782	1.10482	0.094953		34.9381	1.08231	0.0972443
34.7562	1.46123	0.18069		34.642	1.09932	0.0991137		34.902	1.08947	0.108672
34.7205	1.46773	0.181699		34.6058	1.09751	0.0978383		34.8658	1.09014	0.108775
34.6849	1.46105	0.172984		34.5696	1.10077	0.100057		34.8296	1.08336	0.105605
34.6493	1.46698	0.190772		34.5334	1.10272	0.105574		34.7934	1.08226	0.0991348
34.6137	1.4617	0.176112		34.4973	1.1111	0.0980031		34.7572	1.0862	0.104925
34.5781	1.46712	0.185387		34.4611	1.10394	0.0985471		34.721	1.081	0.101925
34.5424	1.46391	0.184484		34.4249	1.11106	0.104507		34.6848	1.08348	0.100555
34.5068	1.4616	0.187549		34.3887	1.1083	0.0965412		34.6486	1.09355	0.099729
34.4712	1.46508	0.19184		34.3525	1.10576	0.0905878		34.6125	1.08559	0.0987796
34.4356	1.46964	0.188718		34.3163	1.10594	0.0938943		34.5763	1.0902	0.100338
34.3999	1.46362	0.188886		34.2801	1.10686	0.0956499		34.5401	1.09224	0.098998
34.3643	1.466	0.188163		34.2439	1.10725	0.0922141		34.5039	1.09051	0.0990802
34.3287	1.46237	0.180431		34.2078	1.10189	0.088675		34.4677	1.09701	0.105205
34.2931	1.4626	0.189268		34.1716	1.10351	0.0854868		34.4315	1.093	0.0998354
34.2575	1.458	0.187538		34.1354	1.10402	0.0857292		34.3953	1.09269	0.103301
34.2218	1.46164	0.191725		34.0992	1.10741	0.0938021		34.3591	1.096	0.105152
34.1862	1.4675	0.208945		34.063	1.11076	0.0854893		34.3229	1.09425	0.10677
34.1506	1.4715	0.202241		34.0268	1.11006	0.0864487		34.2868	1.08396	0.107789
34.115	1.47439	0.204155		33.9906	1.1059	0.0848832		34.2506	1.08747	0.108392
34.0794	1.46966	0.208835		33.9544	1.10684	0.090716		34.2144	1.09557	0.106156
34.0437	1.47419	0.209724		33.9182	1.10756	0.091167		34.1782	1.08443	0.107595
34.0081	1.46501	0.215		33.8821	1.10905	0.0875472		34.142	1.09056	0.107017
33.9725	1.47023	0.201089		33.8459	1.10423	0.080658		34.1058	1.08757	0.107445
33.9369	1.47701	0.21471		33.8097	1.10955	0.0812042		34.0696	1.08333	0.105272
33.9013	1.4716	0.212214		33.7735	1.10342	0.0788097		34.0334	1.08874	0.103812
33.8656	1.46922	0.213891		33.7373	1.10865	0.076523		33.9973	1.08694	0.0978817
33.83	1.46016	0.206382		33.7011	1.10443	0.077508		33.9611	1.08895	0.0916439
33.7944	1.45843	0.2054		33.6649	1.10501	0.0811323		33.9249	1.08404	0.0950349
33.7588	1.46258	0.203286		33.6287	1.10035	0.0767378		33.8887	1.0855	0.0986089
33.7231	1.45994	0.206455		33.5926	1.10091	0.0790624		33.8525	1.08007	0.0995277
33.6875	1.45986	0.205579		33.5564	1.09566	0.0841219		33.8163	1.07707	0.102634
33.6519	1.46617	0.225994		33.5202	1.10319	0.0852875		33.7801	1.08037	0.10377
33.6163	1.45403	0.214545		33.484	1.09529	0.0818712		33.7439	1.07395	0.0987098
33.5807	1.45985	0.212428		33.4478	1.1001	0.0896985		33.7078	1.08706	0.106879
33.545	1.45144	0.219791		33.4116	1.09372	0.0859341		33.6716	1.08066	0.0966546
33.5094	1.4612	0.219858		33.3754	1.09774	0.0841637		33.6354	1.07775	0.100926
33.4738	1.46015	0.213158		33.3392	1.09638	0.082346		33.5992	1.08101	0.104374
33.4382	1.46162	0.216595		33.3031	1.10475	0.0767142		33.563	1.08083	0.0960212
33.4026	1.45814	0.208739		33.2669	1.10448	0.076562		33.5268	1.07852	0.108273
33.3669	1.4592	0.218565		33.2307	1.09909	0.0782853		33.4906	1.07657	0.105332
33.3313	1.45514	0.218112		33.1945	1.09953	0.072126		33.4544	1.08323	0.110469
33.2957	1.44173	0.214458		33.1583	1.10209	0.0803994		33.4183	1.08266	0.109763
33.2601	1.44037	0.21789		33.1221	1.09775	0.0733694		33.3821	1.07944	0.111355
33.2245	1.44771	0.213117		33.0859	1.08954	0.0690739		33.3459	1.08075	0.111846
33.1888	1.43893	0.21524		33.0497	1.0939	0.068079		33.3097	1.07579	0.106806
33.1532	1.43478	0.220846		33.0136	1.09267	0.0697711		33.2735	1.07213	0.104072
33.1176	1.42812	0.215947		32.9774	1.09523	0.0665428		33.2373	1.07482	0.105924
33.082	1.42473	0.203537		32.9412	1.08805	0.0687978		33.2011	1.06848	0.102584
33.0463	1.41905	0.201075		32.905	1.09285	0.0717981		33.1649	1.06303	0.0988389
33.0107	1.42725	0.195906		32.8688	1.08871	0.0716556		33.1288	1.06693	0.0947356
32.9751	1.42615	0.205287		32.8326	1.08964	0.072748		33.0926	1.0684	0.101051
32.9395	1.43185	0.21199		32.7964	1.07704	0.0727709		33.0564	1.07076	0.102413
32.9039	1.41438	0.206509		32.7602	1.07887	0.0654199		33.0202	1.07532	0.102284
32.8682	1.41766	0.204408		32.7241	1.07961	0.0739892		32.984	1.06906	0.102962
32.8326	1.40984	0.203696		32.6879	1.07792	0.0715226		32.9478	1.07273	0.0974505
32.797	1.41394	0.203499		32.6517	1.07064	0.0732665		32.9116	1.07089	0.101142
32.7614	1.41301	0.203002		32.6155	1.07567	0.074943		32.8754	1.06752	0.0987617
32.7258	1.41782	0.211845		32.5793	1.07444	0.0743348		32.8392	1.06533	0.0918342
32.6901	1.4144	0.211828		32.5431	1.07865	0.0707267		32.8031	1.06484	0.0957434
32.6545	1.39919	0.210797		32.5069	1.07614	0.0770136		32.7669	1.06111	0.0982998
32.6189	1.40115	0.206526		32.4707	1.07997	0.0756119		32.7307	1.05698	0.0912787
32.5833	1.39937	0.204027		32.4345	1.07738	0.0705489		32.6945	1.05634	0.0945787
32.5476	1.39147	0.210176		32.3984	1.08146	0.0724433		32.6583	1.06216	0.0917711
32.512	1.38934	0.208012		32.3622	1.08184	0.0701349		32.6221	1.0562	0.0927187
32.4764	1.38248	0.204914		32.326	1.08164	0.0726938		32.5859	1.05887	0.0883034
32.4408	1.37765	0.198291		32.2898	1.07928	0.0721454		32.5497	1.05613	0.094738
32.4052	1.37946	0.20581		32.2536	1.07706	0.0642234		32.5136	1.05637	0.0862494
32.3695	1.38175	0.210609		32.2174	1.07688	0.0674496		32.4774	1.05635	0.0896509
32.3339	1.37941	0.191542		32.1812	1.07668	0.0675167		32.4412	1.05152	0.0902899
32.2983	1.38181	0.202307		32.145	1.07359	0.0633035		32.405	1.05303	0.0902325
32.2627	1.37477	0.194679		32.1089	1.07395	0.0676896		32.3688	1.05272	0.0889221
32.2271	1.37786	0.199784		32.0727	1.07702	0.0600992		32.3326	1.06024	0.0868056
32.1914	1.38048	0.19739		32.0365	1.078	0.0702848		32.2964	1.05463	0.0851644
32.1558	1.37718	0.191144		32.0003	1.06807	0.0639721		32.2602	1.06068	0.079745
32.1202	1.37846	0.194839		31.9641	1.06833	0.0633307		32.2241	1.0488	0.0894126
32.0846	1.37124	0.186222		31.9279	1.06833	0.0636056		32.1879	1.04919	0.0860843
32.049	1.36828	0.187344		31.8917	1.06521	0.058178		32.1517	1.05313	0.0734849
32.0133	1.3679	0.179157		31.8555	1.0659	0.0629937		32.1155	1.04574	0.0817764
31.9777	1.36201	0.177387		31.8194	1.06745	0.0608969		32.0793	1.04237	0.0752454
31.9421	1.36126	0.170998		31.7832	1.0665	0.0567462		32.0431	1.03948	0.0740976
31.9065	1.35979	0.171627		31.747	1.06637	0.0586529		32.0069	1.03821	0.07062
31.8708	1.35647	0.167864		31.7108	1.06632	0.0560238		31.9707	1.04152	0.0808439
31.8352	1.35315	0.175147		31.6746	1.06811	0.0633304		31.9346	1.04362	0.0790303
31.7996	1.35048	0.173649		31.6384	1.06625	0.06205		31.8984	1.03795	0.0768314
31.764	1.34387	0.168584		31.6022	1.05798	0.062521		31.8622	1.04328	0.073021
31.7284	1.3416	0.170062		31.566	1.06378	0.0596764		31.826	1.0456	0.0743695
31.6927	1.3292	0.166834		31.5299	1.06161	0.0589165		31.7898	1.03896	0.0704071
31.6571	1.3284	0.164315		31.4937	1.06363	0.0562925		31.7536	1.04301	0.0691771
31.6215	1.32686	0.169364		31.4575	1.06498	0.0636934		31.7174	1.04303	0.0707237
31.5859	1.3204	0.164481		31.4213	1.06547	0.0598932		31.6812	1.03888	0.0714076
31.5503	1.3241	0.1603		31.3851	1.06472	0.0607485		31.6451	1.04489	0.0719431
31.5146	1.31937	0.154459		31.3489	1.06163	0.0618942		31.6089	1.04722	0.0698661
31.479	1.31407	0.160146		31.3127	1.06165	0.0655797		31.5727	1.04439	0.0695236
31.4434	1.30565	0.160749		31.2765	1.05888	0.0660742		31.5365	1.03991	0.0656256
31.4078	1.30354	0.164251		31.2403	1.06185	0.0656263		31.5003	1.04051	0.0650719
31.3722	1.30834	0.159203		31.2042	1.06305	0.0690852		31.4641	1.0428	0.0625807
31.3365	1.2945	0.155677		31.168	1.06422	0.0760632		31.4279	1.04268	0.0665053
31.3009	1.29822	0.15325		31.1318	1.06893	0.0711745		31.3917	1.04056	0.072164
31.2653	1.29635	0.158079		31.0956	1.06849	0.0732432		31.3555	1.0401	0.0742744
31.2297	1.29539	0.157926		31.0594	1.0656	0.0732457		31.3194	1.03009	0.0707434
31.194	1.29134	0.154509		31.0232	1.0704	0.0784382		31.2832	1.03032	0.0765111
31.1584	1.29545	0.146363		30.987	1.06821	0.0751027		31.247	1.03236	0.0744177
31.1228	1.29524	0.151289		30.9508	1.06712	0.0726104		31.2108	1.03405	0.0711976
31.0872	1.30134	0.152805		30.9147	1.06877	0.0745561		31.1746	1.03904	0.0721988
31.0516	1.29533	0.152948		30.8785	1.06447	0.0770932		31.1384	1.03578	0.0664266
31.0159	1.2962	0.135402		30.8423	1.05662	0.0702968		31.1022	1.03111	0.0662564
30.9803	1.28245	0.135863		30.8061	1.05464	0.0698238		31.066	1.03388	0.0677274
30.9447	1.27748	0.140859		30.7699	1.05382	0.0778837		31.0299	1.02825	0.0687449
30.9091	1.27458	0.134785		30.7337	1.04903	0.0779821		30.9937	1.03146	0.0723013
30.8735	1.27835	0.138133		30.6975	1.04613	0.0798469		30.9575	1.03201	0.0642012
30.8378	1.27334	0.134996		30.6613	1.04382	0.0830123		30.9213	1.02215	0.0698524
30.8022	1.28418	0.130644		30.6252	1.04828	0.0783138		30.8851	1.03011	0.0638858
30.7666	1.28256	0.131005		30.589	1.04815	0.0791883		30.8489	1.03333	0.0674573
30.731	1.28238	0.130483		30.5528	1.05059	0.0741723		30.8127	1.02627	0.0652695
30.6953	1.28301	0.14058		30.5166	1.04245	0.0746412		30.7765	1.02795	0.0608743
30.6597	1.27846	0.134079		30.4804	1.05171	0.0709763		30.7404	1.0251	0.0661094
30.6241	1.27496	0.133162		30.4442	1.04859	0.071313		30.7042	1.0263	0.0661829
30.5885	1.26959	0.133835		30.408	1.04602	0.0725648		30.668	1.02041	0.0681829
30.5529	1.27309	0.132108		30.3718	1.03942	0.0727108		30.6318	1.02021	0.0682733
30.5172	1.26436	0.12784		30.3357	1.03477	0.0789508		30.5956	1.01797	0.0668208
30.4816	1.26346	0.12563		30.2995	1.03061	0.0825612		30.5594	1.0215	0.0629025
30.446	1.25394	0.120564		30.2633	1.03156	0.0827781		30.5232	1.02764	0.0652391
30.4104	1.25348	0.129197		30.2271	1.026	0.081469		30.487	1.02453	0.0602302
30.3748	1.24043	0.128454		30.1909	1.0304	0.082068		30.4509	1.02446	0.0680555
30.3391	1.24716	0.124612		30.1547	1.02168	0.076954		30.4147	1.02557	0.0695459
30.3035	1.23805	0.121356		30.1185	1.02853	0.0824449		30.3785	1.02476	0.072216
30.2679	1.23843	0.121815		30.0823	1.02912	0.0789782		30.3423	1.02381	0.0762143
30.2323	1.23462	0.116505		30.0462	1.02362	0.0765336		30.3061	1.01973	0.0797175
30.1967	1.23793	0.12362		30.01	1.0166	0.0765485		30.2699	1.0201	0.0721054
30.161	1.23729	0.123656		29.9738	1.02198	0.0798804		30.2337	1.02093	0.0691732
30.1254	1.23348	0.126027		29.9376	1.01725	0.0830869		30.1975	1.01325	0.070622
30.0898	1.23677	0.116991		29.9014	1.02485	0.0798469		30.1613	1.01344	0.0664735
30.0542	1.23432	0.113981		29.8652	1.01788	0.0822812		30.1252	1.01118	0.0662561
30.0185	1.22582	0.107676		29.829	1.01819	0.0844012		30.089	1.00982	0.0671132
29.9829	1.22423	0.110942		29.7928	1.02104	0.0785798		30.0528	1.00733	0.0696341
29.9473	1.21633	0.109792		29.7566	1.01619	0.0763319		30.0166	0.995899	0.0678132
29.9117	1.2248	0.107989		29.7205	1.01326	0.0814927		29.9804	1.00561	0.0688437
29.8761	1.20929	0.113618		29.6843	1.01109	0.0789419		29.9442	0.998525	0.0663505
29.8404	1.20934	0.107952		29.6481	1.00279	0.0767883		29.908	1.00436	0.0637536
29.8048	1.21231	0.103417		29.6119	1.00241	0.0812745		29.8718	0.996429	0.0643014
29.7692	1.20441	0.101252		29.5757	0.995328	0.0800349		29.8357	0.9986	0.0646925
29.7336	1.20807	0.103221		29.5395	0.998434	0.0779137		29.7995	1.0036	0.0688156
29.698	1.21487	0.113057		29.5033	0.995514	0.0832384		29.7633	1.00145	0.0701927
29.6623	1.20602	0.10939		29.4671	0.988783	0.0809027		29.7271	0.998819	0.0701002
29.6267	1.20213	0.111498		29.431	0.996009	0.0806652		29.6909	1.00362	0.0753506
29.5911	1.19239	0.110653		29.3948	0.997155	0.084537		29.6547	0.996369	0.0670366
29.5555	1.19308	0.12742		29.3586	0.997655	0.0823826		29.6185	0.991583	0.0717527
29.5199	1.18507	0.128258		29.3224	0.993903	0.0855607		29.5823	0.9923	0.0755609
29.4842	1.18087	0.123502		29.2862	0.993742	0.0901771		29.5462	0.994136	0.0832203
29.4486	1.18753	0.132415		29.25	0.991344	0.0901653		29.51	0.995041	0.0838043
29.413	1.18895	0.125948		29.2138	0.984468	0.0857031		29.4738	0.984218	0.0836215
29.3774	1.17703	0.123859		29.1776	0.987465	0.0872904		29.4376	0.984492	0.0984676
29.3417	1.17492	0.117714		29.1415	0.983737	0.085169		29.4014	0.982449	0.0967482
29.3061	1.17336	0.121088		29.1053	0.975418	0.0869741		29.3652	0.986808	0.101973
29.2705	1.16941	0.124469		29.0691	0.971064	0.0825367		29.329	0.984043	0.103286
29.2349	1.17472	0.118953		29.0329	0.968348	0.0864132		29.2928	0.979367	0.108148
29.1993	1.17734	0.121792		28.9967	0.967958	0.0880955		29.2567	0.975312	0.113279
29.1636	1.17922	0.124099		28.9605	0.957811	0.0819543		29.2205	0.972967	0.102091
29.128	1.17398	0.126811		28.9243	0.95806	0.084757		29.1843	0.972482	0.102677
29.0924	1.16136	0.127664		28.8881	0.957081	0.0809856		29.1481	0.970056	0.0996824
29.0568	1.15111	0.12432		28.852	0.954041	0.0908255		29.1119	0.971689	0.0951512
29.0212	1.14972	0.11785		28.8158	0.948778	0.0837135		29.0757	0.968136	0.0901939
28.9855	1.14035	0.124754		28.7796	0.951904	0.0921343		29.0395	0.959772	0.0843605
28.9499	1.13689	0.124849		28.7434	0.947442	0.0812905		29.0033	0.955119	0.0908649
28.9143	1.13188	0.124232		28.7072	0.946943	0.0829518		28.9672	0.952081	0.0868922
28.8787	1.13109	0.128751		28.671	0.947066	0.0874979		28.931	0.955732	0.0873837
28.843	1.12414	0.126835		28.6348	0.937146	0.0846706		28.8948	0.955449	0.0923661
28.8074	1.12211	0.127281		28.5986	0.941262	0.0899445		28.8586	0.949362	0.095055
28.7718	1.11876	0.12543		28.5625	0.936376	0.0891971		28.8224	0.951519	0.0965337
28.7362	1.11985	0.120912		28.5263	0.930921	0.0868247		28.7862	0.951628	0.0971428
28.7006	1.11193	0.123555		28.4901	0.929095	0.0877368		28.75	0.94347	0.0979169
28.6649	1.11857	0.11963		28.4539	0.921187	0.083394		28.7138	0.945055	0.0947352
28.6293	1.11026	0.125509		28.4177	0.914541	0.0875832		28.6776	0.947396	0.09878
28.5937	1.1075	0.128753		28.3815	0.921925	0.083575		28.6415	0.937884	0.0969527
28.5581	1.10629	0.131172		28.3453	0.913406	0.0877338		28.6053	0.932421	0.0996844
28.5225	1.10525	0.137835		28.3091	0.912389	0.0850315		28.5691	0.925316	0.0944901
28.4868	1.09982	0.126648		28.2729	0.907651	0.0886034		28.5329	0.91908	0.102112
28.4512	1.10595	0.132845		28.2368	0.897155	0.0878865		28.4967	0.91474	0.101413
28.4156	1.09489	0.128602		28.2006	0.900286	0.0839773		28.4605	0.91343	0.0997929
28.38	1.08865	0.140183		28.1644	0.892907	0.0812802		28.4243	0.907074	0.0947914
28.3444	1.08426	0.135		28.1282	0.896593	0.0822464		28.3881	0.910997	0.10127
28.3087	1.0849	0.134466		28.092	0.892903	0.0862436		28.352	0.906751	0.0952225
28.2731	1.07237	0.131553		28.0558	0.885075	0.0838754		28.3158	0.905433	0.0927703
28.2375	1.07471	0.133371		28.0196	0.886726	0.0844172		28.2796	0.901067	0.0913862
28.2019	1.0698	0.132592		27.9834	0.885684	0.0803189		28.2434	0.904126	0.0951464
28.1662	1.06307	0.135059		27.9473	0.879287	0.0800045		28.2072	0.894538	0.0885811
28.1306	1.06513	0.133006		27.9111	0.877236	0.0815802		28.171	0.894531	0.0929315
28.095	1.06687	0.134071		27.8749	0.872794	0.0822862		28.1348	0.886955	0.0928343
28.0594	1.05496	0.135922		27.8387	0.86557	0.083487		28.0986	0.883993	0.0946481
28.0238	1.04874	0.135987		27.8025	0.865882	0.0835585		28.0625	0.885552	0.0906592
27.9881	1.04966	0.130154		27.7663	0.865858	0.0857199		28.0263	0.876488	0.0924136
27.9525	1.04753	0.134141		27.7301	0.862264	0.0874219		27.9901	0.881293	0.0946313
27.9169	1.04534	0.137408		27.6939	0.860409	0.084489		27.9539	0.874982	0.0952449
27.8813	1.03475	0.13287		27.6578	0.857591	0.0846131		27.9177	0.866565	0.0957111
27.8457	1.03429	0.138015		27.6216	0.852815	0.0829761		27.8815	0.863331	0.0923263
27.81	1.02855	0.136176		27.5854	0.848965	0.0820809		27.8453	0.856694	0.0936986
27.7744	1.03077	0.138117		27.5492	0.841125	0.0769238		27.8091	0.856153	0.0868469
27.7388	1.02124	0.137149		27.513	0.839889	0.0782484		27.773	0.851653	0.094026
27.7032	1.02423	0.139486		27.4768	0.835641	0.0795463		27.7368	0.844608	0.0819596
27.6676	1.01891	0.138149		27.4406	0.828899	0.0808866		27.7006	0.84445	0.0874053
27.6319	1.00886	0.136081		27.4044	0.82703	0.0822807		27.6644	0.842873	0.0860896
27.5963	1.0071	0.14348		27.3683	0.824675	0.0784223		27.6282	0.837627	0.0847688
27.5607	1.00271	0.142145		27.3321	0.824213	0.077069		27.592	0.83948	0.084249
27.5251	1.00291	0.142918		27.2959	0.821024	0.0778359		27.5558	0.837044	0.0798316
27.4894	1.0023	0.148977		27.2597	0.812762	0.0767692		27.5196	0.829003	0.0826152
27.4538	0.996839	0.142144		27.2235	0.812847	0.0759362		27.4835	0.827508	0.0822815
27.4182	0.995831	0.140757		27.1873	0.81076	0.0779846		27.4473	0.823476	0.0895434
27.3826	0.98878	0.140897		27.1511	0.807371	0.0754072		27.4111	0.817042	0.0890522
27.347	0.981336	0.14806		27.1149	0.80386	0.0722637		27.3749	0.807255	0.090023
27.3113	0.976083	0.146073		27.0787	0.799145	0.076776		27.3387	0.806389	0.0898611
27.2757	0.966686	0.143879		27.0426	0.794498	0.0752083		27.3025	0.802562	0.0846084
27.2401	0.961605	0.145268		27.0064	0.789767	0.0709723		27.2663	0.79994	0.0854588
27.2045	0.9589	0.145885		26.9702	0.788773	0.0784737		27.2301	0.802161	0.0883596
27.1689	0.960378	0.14161		26.934	0.783411	0.0824957		27.1939	0.803964	0.085929
27.1332	0.948961	0.144095		26.8978	0.779038	0.0813137		27.1578	0.797493	0.0922404
27.0976	0.94512	0.138926		26.8616	0.777024	0.0813913		27.1216	0.797974	0.0892293
27.062	0.941631	0.134897		26.8254	0.773043	0.0782761		27.0854	0.792731	0.0867137
27.0264	0.931547	0.138531		26.7892	0.771234	0.0758925		27.0492	0.785719	0.0840796
26.9907	0.930198	0.129796		26.7531	0.763781	0.0794808		27.013	0.782823	0.0866333
26.9551	0.928501	0.13788		26.7169	0.76514	0.0742427		26.9768	0.775093	0.0795681
26.9195	0.921352	0.142247		26.6807	0.761834	0.0772329		26.9406	0.778951	0.0819291
26.8839	0.917742	0.141367		26.6445	0.759307	0.0704973		26.9044	0.774766	0.0817713
26.8483	0.914276	0.139579		26.6083	0.756773	0.0763603		26.8683	0.77204	0.0798479
26.8126	0.899042	0.136875		26.5721	0.7464	0.0740265		26.8321	0.77065	0.0851646
26.777	0.904682	0.141653		26.5359	0.747182	0.0762051		26.7959	0.764352	0.0809557
26.7414	0.898051	0.131283		26.4997	0.743512	0.0776551		26.7597	0.767768	0.0743396
26.7058	0.894048	0.133325		26.4636	0.74016	0.0756945		26.7235	0.765855	0.0755891
26.6702	0.891163	0.129895		26.4274	0.732536	0.0755414		26.6873	0.76042	0.0722626
26.6345	0.884636	0.128574		26.3912	0.73167	0.0743006		26.6511	0.751008	0.0687648
26.5989	0.879413	0.130224		26.355	0.730593	0.0733839		26.6149	0.750572	0.0750838
26.5633	0.870503	0.132955		26.3188	0.722055	0.074302		26.5788	0.749875	0.0734302
26.5277	0.867245	0.130611		26.2826	0.721346	0.0736278		26.5426	0.742122	0.069811
26.4921	0.861318	0.13783		26.2464	0.715108	0.0820836		26.5064	0.741737	0.0776869
26.4564	0.85241	0.139351		26.2102	0.713836	0.0790894		26.4702	0.738233	0.0791479
26.4208	0.849588	0.136003		26.1741	0.708713	0.0826149		26.434	0.728625	0.0744342
26.3852	0.849475	0.141735		26.1379	0.701437	0.0849462		26.3978	0.730492	0.0779882
26.3496	0.840719	0.1405		26.1017	0.70066	0.0817723		26.3616	0.722137	0.0667314
26.3139	0.843068	0.137549		26.0655	0.697892	0.0823806		26.3254	0.716147	0.0753709
26.2783	0.82745	0.132927		26.0293	0.68847	0.0779005		26.2893	0.715526	0.0769759
26.2427	0.823807	0.133516		25.9931	0.689089	0.0826709		26.2531	0.707462	0.0714235
26.2071	0.822133	0.141948		25.9569	0.687762	0.0787801		26.2169	0.704589	0.0737372
26.1715	0.813716	0.141612		25.9207	0.679371	0.0792411		26.1807	0.705479	0.0739915
26.1358	0.807172	0.138818		25.8846	0.678699	0.0798421		26.1445	0.698699	0.0796718
26.1002	0.804736	0.141013		25.8484	0.673526	0.0775285		26.1083	0.697945	0.0720992
26.0646	0.799641	0.136563		25.8122	0.664311	0.0797229		26.0721	0.695661	0.0744538
26.029	0.789379	0.139478		25.776	0.661856	0.0806628		26.0359	0.693906	0.0677364
25.9934	0.77542	0.136453		25.7398	0.660748	0.0802018		25.9997	0.691177	0.0697162
25.9577	0.776317	0.139624		25.7036	0.660457	0.0791516		25.9636	0.687977	0.069272
25.9221	0.769911	0.134739		25.6674	0.654144	0.0808507		25.9274	0.681188	0.0699452
25.8865	0.7599	0.136145		25.6312	0.652954	0.0824439		25.8912	0.679882	0.0680975
25.8509	0.75965	0.138131		25.595	0.64809	0.0840469		25.855	0.682183	0.0697782
25.8152	0.754967	0.131082		25.5589	0.636173	0.0794173		25.8188	0.670467	0.0693555
25.7796	0.748631	0.131301		25.5227	0.634347	0.0852571		25.7826	0.664905	0.0654695
25.744	0.743232	0.128084		25.4865	0.626852	0.0834814		25.7464	0.668356	0.0633907
25.7084	0.734418	0.124368		25.4503	0.624388	0.0826154		25.7102	0.660651	0.0669267
25.6728	0.733632	0.132901		25.4141	0.613478	0.0851747		25.6741	0.659099	0.0688381
25.6371	0.725512	0.132308		25.3779	0.616207	0.0829386		25.6379	0.655786	0.0709832
25.6015	0.713177	0.127743		25.3417	0.611156	0.0849533		25.6017	0.654735	0.0703134
25.5659	0.707271	0.126017		25.3055	0.607413	0.0882145		25.5655	0.648934	0.0740583
25.5303	0.70847	0.126482		25.2694	0.607453	0.0897371		25.5293	0.646012	0.0755405
25.4947	0.708796	0.139009		25.2332	0.603604	0.0901291		25.4931	0.642576	0.0764011
25.459	0.700792	0.132968		25.197	0.597081	0.0928056		25.4569	0.636763	0.0735654
25.4234	0.69587	0.135828		25.1608	0.593773	0.0930394		25.4207	0.633985	0.0722998
25.3878	0.681971	0.132164		25.1246	0.592812	0.093292		25.3846	0.628096	0.0722965
25.3522	0.681003	0.136984		25.0884	0.579952	0.0936952		25.3484	0.627257	0.0755077
25.3166	0.668833	0.133841		25.0522	0.581905	0.0954615		25.3122	0.622473	0.0771102
25.2809	0.65978	0.132509		25.016	0.573227	0.0910678		25.276	0.617794	0.0767824
25.2453	0.657362	0.134708		24.9799	0.569034	0.0906101		25.2398	0.608302	0.0741462
25.2097	0.652054	0.129034		24.9437	0.563801	0.0917418		25.2036	0.607037	0.077047
25.1741	0.645799	0.127921		24.9075	0.557399	0.0915863		25.1674	0.603916	0.0751398
25.1384	0.641721	0.131976		24.8713	0.554371	0.0907379		25.1312	0.595633	0.0745271
25.1028	0.629711	0.131535		24.8351	0.549268	0.0909949		25.0951	0.595005	0.0724026
25.0672	0.625914	0.131683		24.7989	0.54669	0.0938426		25.0589	0.589758	0.0738424
25.0316	0.618294	0.134105		24.7627	0.543013	0.0919274		25.0227	0.58421	0.0718491
24.996	0.61283	0.134335		24.7265	0.534754	0.0909692		24.9865	0.586713	0.0765954
24.9603	0.607175	0.13545		24.6904	0.530098	0.0936498		24.9503	0.580041	0.0743315
24.9247	0.600803	0.133888		24.6542	0.525617	0.0919553		24.9141	0.577858	0.0740537
24.8891	0.594588	0.136382		24.618	0.523293	0.0948529		24.8779	0.572369	0.0773189
24.8535	0.590447	0.134875		24.5818	0.517716	0.0956146		24.8417	0.56662	0.076629
24.8179	0.585498	0.13271		24.5456	0.515998	0.0961832		24.8056	0.558895	0.0761378
24.7822	0.577545	0.134659		24.5094	0.503489	0.0939271		24.7694	0.556051	0.0815372
24.7466	0.574559	0.138829		24.4732	0.502044	0.0957456		24.7332	0.544806	0.0740998
24.711	0.567065	0.133268		24.437	0.498367	0.0993223		24.697	0.544742	0.0772685
24.6754	0.560016	0.128462		24.4009	0.491722	0.0991543		24.6608	0.545384	0.0820449
24.6398	0.556296	0.130527		24.3647	0.485446	0.0976997		24.6246	0.536482	0.0826185
24.6041	0.5445	0.124907		24.3285	0.480874	0.0988843		24.5884	0.531733	0.0871548
24.5685	0.535593	0.127754		24.2923	0.473755	0.099088		24.5522	0.533785	0.0853388
24.5329	0.52923	0.125328		24.2561	0.466449	0.101042		24.516	0.525461	0.0917904
24.4973	0.519121	0.124192		24.2199	0.460641	0.0983553		24.4799	0.520161	0.0870129
24.4616	0.518552	0.122353		24.1837	0.458144	0.0992209		24.4437	0.51546	0.088786
24.426	0.51043	0.124701		24.1475	0.456354	0.100089		24.4075	0.510996	0.0860376
24.3904	0.502879	0.124669		24.1113	0.451509	0.0963581		24.3713	0.505045	0.0867494
24.3548	0.496419	0.123676		24.0752	0.444691	0.0958476		24.3351	0.499089	0.0811335
24.3192	0.49145	0.125851		24.039	0.438549	0.0981973		24.2989	0.494875	0.0815919
24.2835	0.480797	0.129243		24.0028	0.433911	0.0974232		24.2627	0.485655	0.085982
24.2479	0.476883	0.131814		23.9666	0.426284	0.0951064		24.2265	0.481184	0.0825956
24.2123	0.470092	0.12566		23.9304	0.419409	0.0952476		24.1904	0.473116	0.0876977
24.1767	0.464468	0.127356		23.8942	0.412976	0.0978453		24.1542	0.469048	0.0868948
24.1411	0.45541	0.126112		23.858	0.408365	0.0970363		24.118	0.463885	0.084875
24.1054	0.448509	0.12542		23.8218	0.399353	0.101341		24.0818	0.454087	0.0833302
24.0698	0.444788	0.132813		23.7857	0.396822	0.0975533		24.0456	0.453663	0.0882585
24.0342	0.431726	0.126887		23.7495	0.388168	0.098825		24.0094	0.444345	0.0854099
23.9986	0.426228	0.127109		23.7133	0.382478	0.100657		23.9732	0.440407	0.0896821
23.9629	0.419682	0.126931		23.6771	0.377811	0.0962236		23.937	0.437018	0.0843124
23.9273	0.414602	0.124174		23.6409	0.372349	0.0947577		23.9009	0.426138	0.0888234
23.8917	0.403821	0.120812		23.6047	0.366063	0.0966438		23.8647	0.423231	0.0846618
23.8561	0.400272	0.119519		23.5685	0.358916	0.0952806		23.8285	0.420026	0.0908232
23.8205	0.391833	0.120749		23.5323	0.353815	0.0963382		23.7923	0.412559	0.0856264
23.7848	0.387687	0.127108		23.4962	0.349761	0.096821		23.7561	0.409339	0.0852292
23.7492	0.3774	0.122802		23.46	0.345924	0.0986491		23.7199	0.402036	0.087428
23.7136	0.371439	0.122582		23.4238	0.342846	0.0972479		23.6837	0.394581	0.0826996
23.678	0.36527	0.121943		23.3876	0.336573	0.0954526		23.6475	0.393511	0.0843179
23.6424	0.357062	0.122464		23.3514	0.330299	0.0964255		23.6114	0.386823	0.0856173
23.6067	0.35066	0.116314		23.3152	0.32698	0.096627		23.5752	0.379032	0.084234
23.5711	0.342763	0.118126		23.279	0.316299	0.0966232		23.539	0.374677	0.0883165
23.5355	0.340649	0.118346		23.2428	0.311486	0.0973081		23.5028	0.36721	0.0848806
23.4999	0.328527	0.11411		23.2067	0.303746	0.0961773		23.4666	0.361892	0.0849742
23.4643	0.321149	0.111847		23.1705	0.296176	0.09533		23.4304	0.358866	0.0865157
23.4286	0.314427	0.109923		23.1343	0.289425	0.0936778		23.3942	0.351615	0.0877431
23.393	0.311099	0.113916		23.0981	0.28595	0.0914589		23.358	0.34841	0.0862491
23.3574	0.304327	0.107905		23.0619	0.279423	0.0884293		23.3218	0.343831	0.084948
23.3218	0.298737	0.111906		23.0257	0.276748	0.0911822		23.2857	0.337283	0.0851677
23.2861	0.291524	0.109885		22.9895	0.269081	0.0920137		23.2495	0.329546	0.0830493
23.2505	0.28407	0.110342		22.9533	0.263551	0.0843917		23.2133	0.322562	0.0801163
23.2149	0.27843	0.107406		22.9171	0.256719	0.0817265		23.1771	0.319253	0.0787682
23.1793	0.273739	0.106429		22.881	0.250123	0.0839354		23.1409	0.313701	0.081835
23.1437	0.270975	0.110356		22.8448	0.248406	0.0819		23.1047	0.306995	0.0804118
23.108	0.265427	0.10516		22.8086	0.240182	0.0837317		23.0685	0.301904	0.0763759
23.0724	0.256483	0.0988597		22.7724	0.236786	0.082065		23.0323	0.299726	0.0772043
23.0368	0.249191	0.10001		22.7362	0.23118	0.0830859		22.9962	0.291232	0.0771855
23.0012	0.244146	0.0999144		22.7	0.227023	0.0814698		22.96	0.285424	0.0774643
22.9656	0.239091	0.0995784		22.6638	0.22191	0.0850581		22.9238	0.280733	0.0742924
22.9299	0.231472	0.0954799		22.6276	0.215915	0.0800069		22.8876	0.277258	0.0755933
22.8943	0.222229	0.0905987		22.5915	0.212196	0.0818745		22.8514	0.267747	0.0765905
22.8587	0.216569	0.0895826		22.5553	0.205938	0.0782258		22.8152	0.26152	0.0712751
22.8231	0.212851	0.0872584		22.5191	0.19994	0.0757455		22.779	0.257219	0.0724016
22.7875	0.205853	0.0861911		22.4829	0.195142	0.0724614		22.7428	0.249627	0.0728959
22.7518	0.197354	0.0843327		22.4467	0.191622	0.0738526		22.7067	0.24403	0.0697394
22.7162	0.197515	0.0821223		22.4105	0.186069	0.0707622		22.6705	0.239294	0.0685989
22.6806	0.189266	0.0796538		22.3743	0.181179	0.0739201		22.6343	0.234046	0.0654996
22.645	0.187988	0.0785888		22.3381	0.17811	0.0686989		22.5981	0.229336	0.0662366
22.6093	0.181323	0.0773507		22.302	0.173471	0.0718051		22.5619	0.224183	0.0661567
22.5737	0.178384	0.0764473		22.2658	0.169059	0.0675882		22.5257	0.218336	0.0664514
22.5381	0.170486	0.0726277		22.2296	0.164127	0.0674586		22.4895	0.21322	0.0637453
22.5025	0.167867	0.0713027		22.1934	0.157183	0.065674		22.4533	0.207024	0.0639627
22.4669	0.160858	0.0693891		22.1572	0.15429	0.0629866		22.4172	0.205209	0.0643292
22.4312	0.156667	0.0674969		22.121	0.151018	0.0599343		22.381	0.198086	0.0596342
22.3956	0.150443	0.0648029		22.0848	0.144409	0.0610275		22.3448	0.193046	0.0583462
22.36	0.147858	0.066078		22.0486	0.143516	0.058011		22.3086	0.190232	0.0567785
22.3244	0.143367	0.0634184		22.0125	0.13746	0.055625		22.2724	0.184638	0.0562429
22.2888	0.136042	0.0587734		21.9763	0.134964	0.0580522		22.2362	0.180604	0.0531021
22.2531	0.136754	0.0608639		21.9401	0.129834	0.0545252		22.2	0.175603	0.0578929
22.2175	0.132779	0.056942		21.9039	0.12829	0.0554287		22.1638	0.169184	0.0519671
22.1819	0.128793	0.0586065		21.8677	0.123586	0.0517411		22.1277	0.164168	0.0499471
22.1463	0.12416	0.0540147		21.8315	0.12158	0.0518811		22.0915	0.16163	0.0494144
22.1106	0.120251	0.0515144		21.7953	0.118031	0.0523399		22.0553	0.154344	0.0487873
22.075	0.119763	0.0499641		21.7591	0.11482	0.0530427		22.0191	0.151586	0.0448165
22.0394	0.115626	0.0484421		21.723	0.112115	0.0491917		21.9829	0.148344	0.0466226
22.0038	0.111888	0.0482648		21.6868	0.108619	0.046051		21.9467	0.145114	0.0467468
21.9682	0.107931	0.0466791		21.6506	0.107023	0.0453013		21.9105	0.141843	0.0458447
21.9325	0.103855	0.0414328		21.6144	0.103263	0.0445106		21.8743	0.13526	0.0456932
21.8969	0.102998	0.0391221		21.5782	0.100733	0.042227		21.8381	0.133038	0.0448098
21.8613	0.100969	0.0406582		21.542	0.0968849	0.0426735		21.802	0.128237	0.0423866
21.8257	0.0943927	0.0365543		21.5058	0.0954005	0.0410867		21.7658	0.124442	0.0417299
21.7901	0.0956965	0.0396962		21.4696	0.0919189	0.0387162		21.7296	0.120002	0.0399173
21.7544	0.0924372	0.0379848		21.4334	0.0903287	0.0374841		21.6934	0.117095	0.0358298
21.7188	0.0904121	0.03551		21.3973	0.085761	0.0340242		21.6572	0.114483	0.0383012
21.6832	0.0895984	0.0333374		21.3611	0.0843734	0.0355748		21.621	0.111229	0.0358198
21.6476	0.0840804	0.0341912		21.3249	0.0812503	0.0354436		21.5848	0.106972	0.0341509
21.612	0.0872645	0.0322871		21.2887	0.080931	0.0336655		21.5486	0.10333	0.0331986
21.5763	0.0803036	0.0294891		21.2525	0.0811285	0.0318474		21.5125	0.101039	0.0339249
21.5407	0.079147	0.0285218		21.2163	0.0765239	0.0331247		21.4763	0.0992599	0.030868
21.5051	0.0798343	0.0305255		21.1801	0.0746695	0.0314231		21.4401	0.0952149	0.0307562
21.4695	0.0755857	0.0251093		21.1439	0.0728451	0.02841		21.4039	0.0937319	0.029827
21.4338	0.0746988	0.0271231		21.1078	0.0686828	0.027276		21.3677	0.0922822	0.0283355
21.3982	0.0733474	0.0251989		21.0716	0.0703315	0.0274333		21.3315	0.0896266	0.0291004
21.3626	0.0705516	0.0218343		21.0354	0.0673309	0.0269929		21.2953	0.0882915	0.0265038
21.327	0.0650821	0.0190834		20.9992	0.0662991	0.0267101		21.2591	0.087716	0.0266986
21.2914	0.0676313	0.0222575		20.963	0.0635056	0.0242902		21.223	0.0832555	0.0270437
21.2557	0.065155	0.0214612		20.9268	0.0629083	0.0255646		21.1868	0.0805135	0.0242699
21.2201	0.066056	0.0222005		20.8906	0.0606517	0.0238815		21.1506	0.0794356	0.0241533
21.1845	0.0631749	0.0224992		20.8544	0.0608416	0.0228721		21.1144	0.0764767	0.0234884
21.1489	0.063974	0.0230262		20.8183	0.058722	0.0203638		21.0782	0.0730802	0.0214275
21.1133	0.0626941	0.0199077		20.7821	0.0586499	0.020917		21.042	0.0718414	0.0178038
21.0776	0.0609588	0.0206086		20.7459	0.0554784	0.0215694		21.0058	0.0709159	0.0218156
21.042	0.0616262	0.0191855		20.7097	0.0545227	0.0163358		20.9696	0.0689864	0.0193579
21.0064	0.057602	0.0187478		20.6735	0.0541857	0.0177212		20.9335	0.068129	0.018094
20.9708	0.0574266	0.0172431		20.6373	0.051604	0.017499		20.8973	0.0672337	0.0178419
20.9352	0.0564111	0.0167538		20.6011	0.0536238	0.016958		20.8611	0.0653499	0.016987
20.8995	0.0539324	0.0187406		20.5649	0.0529031	0.0168992		20.8249	0.0640171	0.0168618
20.8639	0.0551021	0.0174581		20.5288	0.0509292	0.0148084		20.7887	0.0635839	0.0167601
20.8283	0.052419	0.0158339		20.4926	0.0495599	0.0162105		20.7525	0.0619111	0.015009
20.7927	0.0543781	0.0141856		20.4564	0.0486147	0.0138286		20.7163	0.0619303	0.0161699
20.757	0.0531789	0.015716		20.4202	0.0475093	0.0145036		20.6801	0.0596686	0.0144528
20.7214	0.0529739	0.0155456		20.384	0.0475547	0.0126608		20.644	0.0571432	0.0139224
20.6858	0.0507503	0.0139232		20.3478	0.0466673	0.0140385		20.6078	0.0579979	0.0144146
20.6502	0.0510142	0.0131622		20.3116	0.0460692	0.0138182		20.5716	0.055734	0.0142803
20.6146	0.0507712	0.0141747		20.2754	0.0450407	0.0127241		20.5354	0.0540903	0.0137081
20.5789	0.0509302	0.0131553		20.2392	0.0432034	0.0114643		20.4992	0.0542184	0.0128354
20.5433	0.0489891	0.0148341		20.2031	0.0437405	0.0118525		20.463	0.0516471	0.0128062
20.5077	0.0509123	0.0149972		20.1669	0.0438507	0.0128465		20.4268	0.0515571	0.012232
20.4721	0.0483604	0.0143446		20.1307	0.0428091	0.0128164		20.3906	0.0519082	0.0123013
20.4365	0.0483319	0.0122505		20.0945	0.0418811	0.0138726		20.3544	0.0499504	0.0111821
20.4008	0.0465086	0.0141751		20.0583	0.0431775	0.0118182		20.3183	0.0489779	0.0123436
20.3652	0.0474149	0.0146684		20.0221	0.0402765	0.0108451		20.2821	0.049246	0.0116844
20.3296	0.0472937	0.013415		19.9859	0.0416271	0.0117142		20.2459	0.0477516	0.0122075
20.294	0.0452796	0.0125267		19.9497	0.0409327	0.0109988		20.2097	0.0482595	0.0104358
20.2583	0.0474022	0.0132228		19.9136	0.0409323	0.0114296		20.1735	0.0460934	0.0108111
20.2227	0.0463273	0.0107623		19.8774	0.0404724	0.00988849		20.1373	0.0448397	0.0112849
20.1871	0.043219	0.0130163		19.8412	0.0384145	0.0100336		20.1011	0.0452834	0.0102952
20.1515	0.0446317	0.0109984		19.805	0.0387436	0.00967209		20.0649	0.0436385	0.0110633
20.1159	0.0440078	0.0143668		19.7688	0.0380936	0.0108428		20.0288	0.0457415	0.00946562
20.0802	0.0440811	0.0135265		19.7326	0.0385011	0.0109549		19.9926	0.0428371	0.0106756
20.0446	0.04343	0.0111845		19.6964	0.0384543	0.00840424		19.9564	0.0439034	0.00984734
20.009	0.0438607	0.0105851		19.6602	0.0375251	0.00829622		19.9202	0.0431853	0.00956602
19.9734	0.0422171	0.0104475		19.6241	0.037007	0.00867116		19.884	0.0438636	0.0112785
19.9378	0.0414056	0.0118368		19.5879	0.0362669	0.0098416		19.8478	0.0436732	0.0101423
19.9021	0.0391763	0.0117138		19.5517	0.0361368	0.00984212		19.8116	0.040886	0.00865873
19.8665	0.0400321	0.0102905		19.5155	0.0366732	0.0076928		19.7754	0.0408662	0.00974563
19.8309	0.0424894	0.0134458		19.4793	0.0355656	0.00816758		19.7393	0.041852	0.00993325
19.7953	0.0387534	0.0101857		19.4431	0.0353408	0.00830634		19.7031	0.0396468	0.00988386
19.7597	0.0398325	0.00973727		19.4069	0.0350252	0.00799756		19.6669	0.0390168	0.00808315
19.724	0.0408054	0.0134066		19.3707	0.0346157	0.00935274		19.6307	0.0395136	0.00983793
19.6884	0.0387436	0.00995955		19.3346	0.0342212	0.00901222		19.5945	0.0393514	0.0103452
19.6528	0.039373	0.0100173		19.2984	0.0339529	0.0104222		19.5583	0.0380926	0.00873986
19.6172	0.0385363	0.0113579		19.2622	0.0335213	0.00868661		19.5221	0.0388862	0.00799957
19.5815	0.037288	0.0108563		19.226	0.0336642	0.00833923		19.4859	0.0373673	0.00953058
19.5459	0.0386473	0.0107996		19.1898	0.0347953	0.00735138		19.4498	0.037865	0.0100175
19.5103	0.038387	0.0116784		19.1536	0.0332807	0.00946214		19.4136	0.0375539	0.0083975
19.4747	0.0367859	0.0116992		19.1174	0.0340341	0.00873501		19.3774	0.0364106	0.0096276
19.4391	0.0365431	0.0102102		19.0812	0.0335452	0.00883506		19.3412	0.0371916	0.00888653
19.4034	0.0356877	0.00996827		19.0451	0.0311793	0.00772214		19.305	0.0373795	0.00835575
19.3678	0.0386161	0.0111569		19.0089	0.032218	0.0085813		19.2688	0.0371486	0.00816348
19.3322	0.0350283	0.0088346		18.9727	0.0312195	0.00735299		19.2326	0.0368572	0.00951169
19.2966	0.0370926	0.0109369		18.9365	0.0317535	0.00796287		19.1964	0.0366685	0.00903826
19.261	0.0349605	0.0103234		18.9003	0.0311446	0.00834279		19.1602	0.0344058	0.00807749
19.2253	0.0348041	0.0104225		18.8641	0.0305246	0.00731537		19.1241	0.0341042	0.0083516
19.1897	0.035772	0.00990311		18.8279	0.0290249	0.00804319		19.0879	0.0345115	0.00743033
19.1541	0.0349655	0.0112742		18.7917	0.0304083	0.00724331		19.0517	0.0352634	0.00827088
19.1185	0.0344495	0.00935969		18.7555	0.030853	0.00830717		19.0155	0.0332814	0.00803309
19.0829	0.0345014	0.0119638		18.7194	0.0292575	0.00882197		18.9793	0.0333983	0.00798518
19.0472	0.0333463	0.00866798		18.6832	0.0293217	0.00704827		18.9431	0.033466	0.00843143
19.0116	0.0348369	0.00930127		18.647	0.030417	0.00717035		18.9069	0.033589	0.00801938
18.976	0.0336194	0.0104823		18.6108	0.0292648	0.00815731		18.8707	0.0327228	0.00762451
18.9404	0.0331351	0.00883386		18.5746	0.0277407	0.00868509		18.8346	0.0343478	0.00803641
18.9047	0.0315752	0.00993769		18.5384	0.0298114	0.0079298		18.7984	0.0315618	0.00810416
18.8691	0.0330409	0.0108661		18.5022	0.0280543	0.00898852		18.7622	0.0301368	0.0077764
18.8335	0.0314805	0.00881777		18.466	0.0270538	0.00754232		18.726	0.0307617	0.00842
18.7979	0.0327741	0.00978846		18.4299	0.0285913	0.00797596		18.6898	0.0320947	0.00753612
18.7623	0.0302521	0.00957396		18.3937	0.0282933	0.00751917		18.6536	0.0312295	0.00820674
18.7266	0.0321489	0.00910612		18.3575	0.0264881	0.00813525		18.6174	0.0309846	0.00712252
18.691	0.0289915	0.0104647		18.3213	0.0272094	0.00677167		18.5812	0.0309764	0.00713701
18.6554	0.0308591	0.0108545		18.2851	0.0270117	0.00782896		18.5451	0.0310423	0.00691547
18.6198	0.0309981	0.00953223		18.2489	0.0280528	0.00730009		18.5089	0.0299393	0.00807923
18.5842	0.03114	0.00967827		18.2127	0.0262689	0.00783791		18.4727	0.0304582	0.00669207
18.5485	0.0307649	0.00980861		18.1765	0.0264847	0.00731599		18.4365	0.0305511	0.00714461
18.5129	0.031281	0.0100041		18.1404	0.0267296	0.00881702		18.4003	0.0290827	0.00695366
18.4773	0.03093	0.0104965		18.1042	0.0255939	0.00808794		18.3641	0.0301665	0.00668258
18.4417	0.0305501	0.0107334		18.068	0.0245885	0.00749726		18.3279	0.0313069	0.00687034
18.406	0.030366	0.0110682		18.0318	0.025832	0.00847788		18.2917	0.0303712	0.00868894
18.3704	0.0295781	0.0112784		17.9956	0.0261502	0.00687299		18.2556	0.0286453	0.00784421
18.3348	0.028892	0.00975465		17.9594	0.0244218	0.0073924		18.2194	0.0303292	0.00714387
18.2992	0.0293018	0.00954888		17.9232	0.0255985	0.00672976		18.1832	0.029896	0.00625804
18.2636	0.027155	0.00965454		17.887	0.024981	0.00674531		18.147	0.0274236	0.00809876
18.2279	0.0304377	0.0096068		17.8509	0.0246129	0.00778379		18.1108	0.0282982	0.0080356
18.1923	0.0284438	0.010836		17.8147	0.0239312	0.00730017		18.0746	0.028443	0.00794372
18.1567	0.0262297	0.00886595		17.7785	0.0241314	0.00725644		18.0384	0.0276096	0.0074363
18.1211	0.0276217	0.00972671		17.7423	0.0230908	0.00681886		18.0022	0.0287803	0.00758634
18.0855	0.0258692	0.0082736		17.7055	0.0227802	0.00631027		17.9661	0.0272391	0.00710839
18.0498	0.0274327	0.00852579		17.6693	0.0239849	0.00547171		17.9299	0.0264352	0.00746187
18.0142	0.0260491	0.0083881		17.6331	0.0221041	0.00631971		17.8937	0.0269223	0.00810532
17.9786	0.0270335	0.00707657		17.5969	0.0227684	0.00699961		17.8575	0.0253642	0.006074
17.943	0.0262073	0.00972752		17.5607	0.0223326	0.00717115		17.8213	0.0262653	0.00591391
17.9074	0.026076	0.00973854		17.5246	0.022153	0.00719121		17.7851	0.0251112	0.00735053
17.8717	0.0241492	0.0090304		17.4884	0.0233708	0.00644988		17.7489	0.0272134	0.00768906
17.8361	0.0245415	0.0086648		17.4522	0.0227633	0.00680742		17.7127	0.0267446	0.00762009
17.8005	0.0251446	0.0102283		17.416	0.0231405	0.00797673		17.6765	0.0262954	0.00751472
17.7649	0.0245946	0.00787882		17.3798	0.0225688	0.00755795		17.6404	0.0255431	0.00646299
17.7292	0.0251238	0.00971425		17.3436	0.0226501	0.00671607		17.6042	0.0246711	0.00697219
17.6936	0.0246855	0.00925139		17.3068	0.0220727	0.0082443		17.568	0.025401	0.00793518
17.658	0.0246056	0.00930358		17.2706	0.0227652	0.00717039		17.5318	0.0235986	0.00729628
17.6224	0.0261286	0.00766266		17.2345	0.0213286	0.00582211		17.4956	0.0241031	0.00719764
17.5868	0.0262124	0.00804417		17.1983	0.0210481	0.00753332		17.4594	0.024527	0.00781284
17.5511	0.0261702	0.00880025		17.1621	0.0209049	0.00688114		17.4226	0.0251844	0.00770346
17.5155	0.0254202	0.00910109		17.1259	0.0209135	0.00603546		17.3864	0.0255602	0.00595818
17.4799	0.0238815	0.00982975		17.0897	0.0206228	0.00727263		17.3503	0.0238191	0.00800933
17.4437	0.0214464	0.00759124		17.0535	0.0206224	0.00551298		17.3141	0.0247524	0.00813644
17.4081	0.0238924	0.00735288		17.0173	0.0209741	0.00591309		17.2779	0.0238753	0.00705013
17.3724	0.0234475	0.00850587		16.9811	0.0195737	0.00599561		17.2417	0.0238365	0.00753278
17.3368	0.022412	0.00937058		16.945	0.0205989	0.00754704		17.2055	0.0228789	0.00710219
17.3012	0.0227486	0.00864791		16.9088	0.0202635	0.0057812		17.1693	0.0228819	0.00766366
17.2656	0.0226104	0.00865597		16.8726	0.0198857	0.00733314		17.1331	0.0245899	0.00741644
17.23	0.0239994	0.00797657		16.8364	0.020273	0.00734922		17.0969	0.0230763	0.00745119
17.1943	0.0230957	0.00874818		16.8002	0.0198745	0.00563678		17.0608	0.0229047	0.00620342
17.1587	0.0218808	0.00818241		16.764	0.0195022	0.00497415		17.0246	0.0227755	0.00754949
17.1231	0.022701	0.00697878		16.7278	0.0192512	0.00741956		16.9884	0.0221451	0.00819631
17.0875	0.0216656	0.00777035		16.6916	0.0207959	0.00708428		16.9522	0.0218105	0.00753319
17.0519	0.0234104	0.00999526		16.6554	0.0191113	0.0060031		16.916	0.0237469	0.00691239
17.0162	0.0221578	0.0079441		16.6193	0.0191489	0.00803639		16.8798	0.0211412	0.00582932
16.9806	0.0223436	0.00871957		16.5831	0.0207048	0.00654913		16.8436	0.0195877	0.0054279
16.9444	0.0219562	0.0092876		16.5463	0.0196472	0.00599467		16.8074	0.0205051	0.00784302
16.9088	0.0213731	0.00870578		16.5101	0.0195407	0.00712347		16.7712	0.0213843	0.00599268
16.8732	0.0219231	0.00940727		16.4739	0.0173399	0.00625387		16.7351	0.0208887	0.00702729
16.8375	0.0222181	0.0103475		16.4377	0.0186381	0.00671783		16.6989	0.0215183	0.00769548
16.8019	0.0210201	0.00836735		16.4015	0.0156225	0.00627059		16.6627	0.0211022	0.00742326
16.7663	0.0203301	0.00865236		16.3653	0.0173863	0.00633044		16.6265	0.0202802	0.00691352
16.7307	0.0218413	0.00899621		16.3292	0.0167922	0.00628685		16.5903	0.021797	0.00772153
16.695	0.0213385	0.00862731		16.293	0.0173248	0.00691627		16.5541	0.0191391	0.00665991
16.6594	0.0204179	0.00883646		16.2568	0.0172114	0.00556937		16.5179	0.0208884	0.00819432
16.6238	0.0198384	0.00804237		16.2206	0.0172336	0.00599154		16.4817	0.0205943	0.0074922
16.5882	0.0199009	0.00833626		16.1844	0.0184054	0.00587781		16.4456	0.0217041	0.00652904
16.5526	0.0195472	0.00824534		16.1476	0.0174508	0.00741614		16.4094	0.0204304	0.00624101
16.5169	0.0203061	0.00793073		16.1114	0.0170554	0.00676576		16.3732	0.0204036	0.00679203
16.4801	0.0211712	0.00703962		16.0746	0.0164437	0.00529645		16.337	0.0201496	0.00793013
16.4445	0.0200894	0.0087721		16.0384	0.0171001	0.00502811		16.3008	0.0174879	0.00694981
16.4077	0.019906	0.00887694		16.0023	0.0172449	0.00708646		16.2646	0.0197843	0.00658715
16.3721	0.0185353	0.00776515		15.9661	0.0171781	0.00676365		16.2284	0.0183108	0.00677863
16.3365	0.0201122	0.00829287		15.9293	0.0166539	0.00587845		16.1922	0.0188108	0.00604649
16.3002	0.0202034	0.00772667		15.8931	0.0168118	0.00634084		16.1561	0.0191267	0.00635401
16.2646	0.0196657	0.00996285		15.8563	0.0165771	0.00725524		16.1199	0.0191345	0.00625326
16.229	0.0202848	0.00916761		15.8195	0.0144816	0.00510694		16.0837	0.0188861	0.00656076
16.1934	0.0194664	0.00847364		15.7833	0.0147723	0.00663914		16.0475	0.0192087	0.00660641
16.1578	0.0185567	0.00720991		15.7471	0.0156708	0.00617567		16.0113	0.0170186	0.00669259
16.1221	0.0180591	0.00743538		15.7109	0.0156393	0.00574094		15.9745	0.0191137	0.00691307
16.0865	0.0184869	0.00816088		15.6748	0.0156778	0.00567774		15.9377	0.018313	0.00599383
16.0497	0.0174881	0.00746297		15.6386	0.0156824	0.0061314		15.9015	0.0188564	0.00643471
16.0141	0.0188764	0.00881243		15.6018	0.0163311	0.00549149		15.8653	0.0174686	0.00755355
15.9785	0.016925	0.00766008		15.5656	0.0146272	0.00670045		15.8292	0.0162814	0.00680685
15.9428	0.0166903	0.00787774		15.5288	0.0152361	0.00564921		15.793	0.0180357	0.00557318
15.9066	0.0170168	0.00876356		15.492	0.0157965	0.00622342		15.7568	0.0180801	0.00652999
15.8704	0.0171055	0.00685475		15.4546	0.0160261	0.00625745		15.7206	0.0178603	0.00652006
15.8336	0.0165473	0.00766522		15.4178	0.0150687	0.00547385		15.6838	0.0176058	0.00487436
15.7974	0.0159414	0.00705304		15.3816	0.0144125	0.00572589		15.6476	0.0166269	0.00644034
15.7612	0.0176633	0.0085718		15.3448	0.0140533	0.00653894		15.6114	0.0177223	0.00696524
15.7256	0.0163885	0.00747833		15.3087	0.0145672	0.00562238		15.5746	0.0175269	0.00694361
15.6899	0.0170151	0.00608536		15.2725	0.0138497	0.00664162		15.5385	0.0159141	0.00596054
15.6537	0.0176158	0.00806845		15.2363	0.0145578	0.00600202		15.5023	0.016342	0.00681104
15.6163	0.0169627	0.00668052		15.2001	0.0123703	0.00552559		15.4655	0.0173551	0.00746988
15.5807	0.0178969	0.00816928		15.1633	0.01481	0.00530944		15.4293	0.0169724	0.00590256
15.5451	0.0182305	0.00806979		15.1265	0.0139509	0.00554615		15.3931	0.0156902	0.00602952
15.5089	0.0158674	0.00631795		15.0903	0.0133102	0.00589898		15.3569	0.017063	0.00571223
15.4721	0.0164028	0.00769045		15.0541	0.0128151	0.00527712		15.3207	0.0161922	0.00575753
15.4364	0.0166239	0.00713452		15.0179	0.0130395	0.00651212		15.2845	0.016798	0.00721278
15.4008	0.017554	0.00596751		14.9818	0.0142723	0.00575609		15.2483	0.0166909	0.00671084
15.3652	0.0155146	0.00629063		14.9456	0.0142254	0.00581895		15.211	0.0148729	0.00612778
15.329	0.0167458	0.00599821		14.9094	0.0140532	0.00589702		15.1742	0.016114	0.00651671
15.2934	0.0177246	0.0088056		14.8732	0.0135792	0.00572852		15.138	0.0152121	0.00666969
15.2577	0.0156549	0.00601384		14.837	0.0125288	0.00496766		15.1012	0.0150462	0.00493777
15.2215	0.0144254	0.00667431		14.8008	0.0119981	0.00593541		15.0644	0.0147202	0.00606739
15.1847	0.0145328	0.00742687		14.7634	0.013297	0.0053633		15.0276	0.0147058	0.00599847
15.1479	0.0166767	0.00619322		14.7272	0.0130413	0.0057108		14.9914	0.0149636	0.0065184
15.1111	0.0161607	0.00753984		14.6898	0.0129116	0.00566696		14.9552	0.0147003	0.00659488
15.0749	0.0148536	0.00759175		14.6537	0.012448	0.00559622		14.919	0.0141417	0.00617017
15.0375	0.0151811	0.00841022		14.6157	0.0133863	0.00650251		14.8828	0.0136628	0.00641244
15.0019	0.0153172	0.00721489		14.5789	0.0123602	0.00523022		14.8461	0.0131824	0.00653956
14.9645	0.0146966	0.00748615		14.5427	0.0123276	0.00520314		14.8093	0.014341	0.00673312
14.9288	0.014542	0.00818554		14.5065	0.0119821	0.00559711		14.7731	0.0137791	0.00600816
14.8908	0.013585	0.00737395		14.4703	0.0131382	0.00530113		14.7369	0.0146554	0.00626353
14.8534	0.0148825	0.00761598		14.4335	0.0127865	0.00611352		14.7007	0.0146795	0.00581963
14.8178	0.0148018	0.00698216		14.3955	0.0116571	0.00513365		14.6639	0.0137821	0.00692558
14.7816	0.0145527	0.00677277		14.3593	0.011271	0.00494934		14.6277	0.0147803	0.00646142
14.7454	0.0141062	0.00565584		14.3231	0.0122557	0.00549254		14.5909	0.0151171	0.00628189
14.7092	0.0142584	0.00702496		14.2864	0.0106104	0.00569801		14.5541	0.0139459	0.00580778
14.6706	0.0147795	0.00702711		14.2496	0.0120574	0.00454094		14.518	0.0133232	0.00645353
14.632	0.0137236	0.00709691		14.2122	0.0106164	0.00544266		14.4818	0.0146036	0.0055407
14.594	0.0133674	0.00707352		14.1754	0.0121045	0.00644757		14.4456	0.0141276	0.00615576
14.5578	0.0140426	0.00742837		14.1386	0.0109295	0.00534385		14.4094	0.0134845	0.00677299
14.5192	0.0133086	0.0064381		14.1018	0.0119622	0.00543495		14.3732	0.0144615	0.00522213
14.4818	0.0130083	0.00698535		14.065	0.0123148	0.00554649		14.337	0.0127256	0.00539997
14.4456	0.0138412	0.00662617		14.0282	0.011966	0.00501558		14.3002	0.0133726	0.00579343
14.4099	0.0140094	0.00726347		13.992	0.0101083	0.00500285		14.264	0.01242	0.00575447
14.3737	0.0135222	0.00616445		13.954	0.0106404	0.00472787		14.2272	0.0124636	0.00603331
14.3375	0.0152497	0.00728215		13.9154	0.0117045	0.00653818		14.1905	0.0127255	0.00558467
14.3001	0.014892	0.00710517		13.8786	0.0109825	0.00560142		14.1537	0.0135124	0.00614172
14.2639	0.0143689	0.00818962		13.8424	0.0114677	0.00509108		14.1169	0.0121619	0.00561993
14.2265	0.0139376	0.00633079		13.8051	0.0107267	0.00549752		14.0801	0.0129704	0.00550532
14.1891	0.0147759	0.00774118		13.7671	0.01001	0.00495589		14.0439	0.0130118	0.0058392
14.1523	0.0121761	0.00684538		13.7297	0.0102183	0.00601223		14.0065	0.0123568	0.00589649
14.1137	0.0130635	0.00651509		13.6917	0.0105653	0.00527247		13.9703	0.012725	0.00455071
14.0769	0.0133374	0.00600319		13.6549	0.0108245	0.00427743		13.9341	0.0118329	0.00551167
14.0413	0.0136117	0.00711315		13.6169	0.00974443	0.005124		13.8961	0.0119772	0.00496214
14.0051	0.0132682	0.00645378		13.5807	0.0106779	0.00467752		13.8593	0.0131209	0.00661749
13.9682	0.0124816	0.00744958		13.5433	0.0121109	0.00509432		13.8219	0.0115208	0.00526171
13.9314	0.0136724	0.006143		13.5065	0.0101557	0.0046687		13.7858	0.0123265	0.00637222
13.8952	0.013068	0.00691929		13.4685	0.0102403	0.00594393		13.7478	0.0119867	0.00649602
13.856	0.0126877	0.00720875		13.4311	0.00970833	0.00478721		13.7116	0.0120247	0.00548948
13.818	0.0127109	0.00743768		13.3943	0.00901058	0.00470208		13.6748	0.0119243	0.00531804
13.7789	0.0119764	0.00609834		13.3557	0.00963271	0.00540482		13.6368	0.0114434	0.00546445
13.7409	0.0132314	0.00702011		13.3183	0.00972114	0.00471592		13.6006	0.0113435	0.00534972
13.7035	0.0127555	0.00793943		13.2821	0.00917602	0.00479236		13.5626	0.0121111	0.00511002
13.6643	0.0140312	0.00679458		13.2429	0.0107509	0.00533529		13.5258	0.0112622	0.00608492
13.6281	0.0129356	0.0063617		13.2055	0.00952755	0.00461747		13.4896	0.0117444	0.00554087
13.5913	0.0131816	0.00663333		13.1688	0.00849606	0.00475257		13.4522	0.0120162	0.00439053
13.5544	0.0121247	0.00550406		13.1302	0.00982482	0.00441266		13.4148	0.0109943	0.00531947
13.5153	0.0122235	0.00607829		13.0928	0.00876557	0.00546869		13.3786	0.01104	0.00529583
13.4785	0.0115805	0.00580449		13.0548	0.0093816	0.00450098		13.3418	0.010347	0.00520298
13.4416	0.0126388	0.00746449		13.0168	0.00925773	0.0049887		13.3045	0.0113347	0.00617758
13.4036	0.0124247	0.00611422		12.98	0.00985951	0.00498571		13.2671	0.0111832	0.00555237
13.3657	0.0119249	0.00635001		12.9408	0.00789865	0.0041162		13.2297	0.0106133	0.00444439
13.3288	0.0122656	0.00680562		12.904	0.00897857	0.0055617		13.1929	0.0111627	0.00516418
13.2908	0.0125652	0.00636815		12.8666	0.00960747	0.00498436		13.1561	0.0113573	0.00525589
13.2534	0.011754	0.00673988		12.828	0.00952926	0.00543356		13.1175	0.0104222	0.00514473
13.2143	0.0135447	0.00658337		12.7912	0.00976892	0.00538844		13.0801	0.0109615	0.00497518
13.1775	0.0114095	0.00633709		12.7532	0.00981416	0.00492176		13.0421	0.0103446	0.00488913
13.1377	0.0111121	0.00539973		12.714	0.0079628	0.00447211		13.0047	0.00981224	0.00515117
13.1015	0.0121115	0.00629171		12.6766	0.00915906	0.00544532		12.9667	0.0111793	0.00532334
13.0641	0.0124541	0.00742721		12.638	0.00847216	0.00534531		12.9299	0.0104304	0.00572191
13.0255	0.0120124	0.00674329		12.6012	0.00830836	0.00456214		12.8913	0.0115044	0.00535323
12.9887	0.0115843	0.00716448		12.5626	0.00850249	0.00441449		12.8545	0.0108717	0.0059184
12.9495	0.0121485	0.00675531		12.5228	0.00905521	0.00433286		12.8165	0.0102221	0.00589632
12.9133	0.0119345	0.00692666		12.4818	0.00839403	0.00448205		12.7803	0.0103882	0.00516527
12.8747	0.0114627	0.00571893		12.4414	0.00871326	0.00481428		12.7441	0.00996987	0.00446876
12.8367	0.0124276	0.00583877		12.3998	0.00878309	0.00422405		12.708	0.0103765	0.00496099
12.7987	0.0117394	0.00500839		12.3593	0.00820465	0.00521031		12.6712	0.011029	0.0052656
12.7589	0.0108598	0.00702035		12.3195	0.00786613	0.00468274		12.6338	0.0108709	0.00521878
12.7209	0.0117745	0.00593704		12.2803	0.00955681	0.00505719		12.5964	0.0101078	0.0056457
12.6847	0.0114746	0.00615647		12.2411	0.00874912	0.00433892		12.5602	0.0105338	0.0046712
12.6479	0.0101415	0.00511094		12.2007	0.00837696	0.00487229		12.5204	0.0109587	0.00537526
12.6069	0.00945914	0.00538379		12.1621	0.00687525	0.00422526		12.4812	0.00921055	0.00469503
12.5689	0.0122146	0.00691749		12.1235	0.00767296	0.00374621		12.4438	0.0093135	0.0042287
12.5297	0.0103412	0.00603055		12.0849	0.00824081	0.00416883		12.4064	0.00919175	0.00440419
12.4923	0.0103686	0.00579274		12.0421	0.00811027	0.00464301		12.3678	0.00981999	0.00448352
12.4567	0.0116259	0.00696764		12.0005	0.00695179	0.00411357		12.3292	0.00874349	0.00452954
12.4199	0.00993066	0.00504911		11.9613	0.00851522	0.00437986		12.2924	0.00894732	0.00431623
12.3801	0.0109859	0.00510093		11.9221	0.00664964	0.00425218		12.2556	0.00979815	0.00443394
12.3439	0.010399	0.00501093		11.8805	0.00766711	0.00458032		12.2152	0.00931546	0.00430858
12.3041	0.0102308	0.0054756		11.8413	0.00775606	0.00459237		12.176	0.00940143	0.00608891
12.265	0.0101477	0.00582065		11.8002	0.00777229	0.00480679		12.138	0.0100195	0.00498012
12.227	0.0104271	0.00687694		11.7586	0.00761569	0.00407417		12.0994	0.00961243	0.00516613
12.1872	0.0102654	0.00744351		11.7158	0.00767513	0.00396528		12.062	0.00847243	0.00478415
12.1444	0.0105742	0.00676861		11.6718	0.00771799	0.00443374		12.0228	0.00890339	0.00519965
12.1064	0.00909193	0.00575058		11.6314	0.00709978	0.00423836		11.9842	0.00928764	0.00535329
12.0667	0.0109816	0.0063815		11.5904	0.0068156	0.00403954		11.9456	0.0103466	0.00560269
12.0275	0.011477	0.00564242		11.5506	0.00795008	0.00501631		11.9058	0.0109011	0.00536334
11.9871	0.00993182	0.00549837		11.5095	0.00861375	0.00475782		11.8684	0.00921471	0.00491093
11.9497	0.0102773	0.00657037		11.4685	0.0065554	0.00385881		11.8286	0.00989227	0.00536006
11.9082	0.011732	0.00664635		11.4293	0.00801185	0.00472147		11.7918	0.00904984	0.00434063
11.8672	0.00975621	0.00601123		11.3901	0.00718583	0.00446492		11.7526	0.00869645	0.00557693
11.8256	0.00983318	0.00562257		11.3509	0.00733843	0.00388409		11.7128	0.00887403	0.00503763
11.7847	0.01017	0.00553839		11.3105	0.00702676	0.00387168		11.6742	0.00913231	0.00540353
11.7455	0.010026	0.00614425		11.2695	0.00669064	0.00409126		11.635	0.00915228	0.00494926
11.7081	0.0100504	0.00561775		11.2285	0.00680985	0.00426597		11.5964	0.0088613	0.00546265
11.6671	0.00974176	0.0060495		11.1893	0.00821906	0.00377015		11.559	0.00864681	0.00495231
11.6262	0.00992179	0.00600967		11.1495	0.00670134	0.00418035		11.521	0.00832706	0.00429555
11.5876	0.0111399	0.00585041		11.1097	0.00789443	0.00449788		11.483	0.0085592	0.00471655
11.5472	0.0105499	0.0056673		11.0711	0.00709314	0.00502428		11.4414	0.00950594	0.00463674
11.505	0.0113644	0.00532701		11.0288	0.00660863	0.00432584		11.404	0.00850694	0.00435761
11.4653	0.00880317	0.00624514		10.983	0.0060506	0.00412244		11.366	0.00880114	0.00575753
11.4261	0.00977819	0.0060391		10.9366	0.00609859	0.00422906		11.3268	0.00882263	0.00468284
11.3881	0.0104331	0.0059211		10.8925	0.00605361	0.00365717		11.2876	0.00867258	0.00462492
11.3489	0.0107714	0.00594676		10.8509	0.00654401	0.00350214		11.2478	0.0078548	0.00443955
11.3079	0.00965875	0.00575901		10.8069	0.00792058	0.00416877		11.2056	0.00920754	0.00467174
11.2699	0.00949278	0.00577429		10.7665	0.0056617	0.00378525		11.1658	0.00837517	0.00484807
11.2331	0.00892055	0.00591539		10.7206	0.00586866	0.00415341		11.1259	0.00842234	0.00447193
11.1963	0.0102726	0.00564729		10.6736	0.0069288	0.00488922		11.0855	0.00792826	0.00461523
11.1548	0.00876345	0.00473048		10.6326	0.00726381	0.00457113		11.0469	0.00660549	0.00439398
11.1162	0.00985633	0.0049648		10.5886	0.00674859	0.00383541		11.0065	0.00800753	0.00457597
11.0728	0.00982458	0.00513958		10.5463	0.00667396	0.00369399		10.9679	0.0088465	0.00515542
11.0331	0.00962859	0.0056993		10.5005	0.00766368	0.00503115		10.9305	0.00779903	0.00409462
10.9915	0.00958365	0.00547674		10.4535	0.00615899	0.00376921		10.8919	0.0076956	0.00437351
10.9488	0.00877642	0.00547575		10.4046	0.00692951	0.0037149		10.8509	0.00921487	0.00465863
10.9108	0.00933041	0.00537361		10.3636	0.00645054	0.00412849		10.8129	0.00733919	0.00383498
10.8686	0.00880512	0.00508511		10.3196	0.00576656	0.00352417		10.7713	0.00886417	0.00470251
10.8259	0.00934937	0.00579589		10.2755	0.00681779	0.00379573		10.7303	0.00892918	0.00469251
10.7843	0.00890131	0.00576072		10.2291	0.00670291	0.00398144		10.6887	0.00854138	0.00463303
10.7427	0.00924388	0.0052738		10.1845	0.00595152	0.00389185		10.6501	0.00795424	0.00487584
10.7006	0.0102519	0.00558803		10.1428	0.00590279	0.0038503		10.6091	0.00935005	0.00500453
10.6579	0.00901815	0.00517911		10.0994	0.00679862	0.00393279		10.5705	0.00760541	0.00401718
10.6151	0.0100589	0.00576853		10.0548	0.00649592	0.0035821		10.5301	0.00793453	0.00432448
10.573	0.00852974	0.00552736		10.012	0.00670891	0.00410169		10.489	0.00846968	0.00466081
10.532	0.00994072	0.00530276		9.96794	0.00693383	0.00415318		10.4492	0.00880422	0.00509629
10.4922	0.00899967	0.00580021		9.92753	0.00631131	0.00385017		10.4058	0.00868649	0.00480372
10.4501	0.00900943	0.00583973		9.88893	0.00674483	0.0041173		10.3684	0.00757386	0.00493609
10.4085	0.00894197	0.00555759		9.8443	0.00549552	0.00325827		10.3262	0.00698067	0.0042883
10.3658	0.00818452	0.00551018		9.79785	0.00609912	0.00391498		10.2816	0.00801261	0.00487633
10.3278	0.00925462	0.00544476		9.7496	0.00689963	0.00428867		10.2363	0.00755407	0.00508387
10.285	0.00907985	0.00596866		9.70437	0.00659554	0.00370218		10.1905	0.00669235	0.00404261
10.2441	0.00892308	0.00570336		9.65552	0.0058953	0.00443202		10.1513	0.00744436	0.00430713
10.2019	0.00837929	0.00547789		9.6139	0.00635802	0.00383531		10.1103	0.00727641	0.00434616
10.1597	0.00817331	0.00549821		9.56746	0.00646866	0.00337196		10.0681	0.00775257	0.00484035
10.1164	0.00994398	0.00573077		9.52283	0.00677307	0.0040417		10.0301	0.00757095	0.00548261
10.0725	0.0080274	0.0050211		9.48001	0.00635802	0.00403373		9.98844	0.00766712	0.00482383
10.0285	0.00850156	0.0050743		9.43658	0.00652567	0.00439734		9.94683	0.00810689	0.0040774
9.98936	0.00848159	0.00495472		9.39255	0.00521333	0.00340635		9.90642	0.00680754	0.00396541
9.94365	0.00864884	0.00540017		9.34309	0.00549386	0.00317561		9.86299	0.00784979	0.00484338
9.90328	0.00956153	0.00632607		9.29967	0.00631588	0.00417495		9.81896	0.00848317	0.00492529
9.8635	0.00868144	0.00530723		9.25564	0.00546064	0.00343771		9.77675	0.00774565	0.00531026
9.82194	0.00836908	0.00508963		9.21222	0.00521455	0.00361682		9.73091	0.00643422	0.00382509
9.77979	0.00877406	0.00548939		9.16758	0.00566909	0.00352066		9.68929	0.00724789	0.00409978
9.73823	0.00858032	0.00570024		9.12416	0.00612999	0.00416342		9.64768	0.00828882	0.00495375
9.69549	0.00894235	0.00652654		9.08315	0.00560261	0.00375601		9.60244	0.00718565	0.00465728
9.65333	0.00774686	0.00577163		9.0355	0.00625972	0.00379609		9.56203	0.00641812	0.00442441
9.61178	0.00862731	0.00551936		8.98966	0.00568629	0.00396408		9.52102	0.00674756	0.00388554
9.5625	0.00751808	0.00482659		8.93779	0.00606164	0.00338406		9.4782	0.00744557	0.00480033
9.50966	0.00832478	0.00561974		8.88773	0.00589032	0.00397587		9.43477	0.00640492	0.00457813
9.46514	0.00798223	0.00588407		8.84431	0.00525667	0.00310416		9.39074	0.00722231	0.00462048
9.42358	0.00740077	0.00473687		8.79967	0.00526695	0.00357068		9.34732	0.00774536	0.00458068
9.37727	0.00753113	0.00555228		8.75384	0.00518807	0.00369772		9.30268	0.00679334	0.00422324
9.33631	0.00762031	0.00479698		8.71162	0.00554285	0.00354248		9.25805	0.00702916	0.00405501
9.29297	0.00801896	0.00560098		8.66759	0.00575911	0.00399664		9.21644	0.00639729	0.00480066
9.24666	0.00775296	0.00499695		8.61512	0.00608596	0.00312521		9.17603	0.00720037	0.00520495
9.1962	0.0090111	0.00519137		8.57109	0.00566103	0.00377439		9.1332	0.00879295	0.00444433
9.15048	0.00704061	0.00489099		8.52404	0.00644378	0.00374786		9.08857	0.00728168	0.00410581
9.10952	0.00841862	0.00510163		8.47398	0.0056378	0.00360373		9.04515	0.00591419	0.00350856
9.0644	0.00840463	0.0052955		8.42875	0.0051276	0.00354963		8.9981	0.00636863	0.00453888
9.01453	0.00832616	0.00537324		8.37869	0.0053737	0.003779		8.95227	0.00744004	0.00559274
8.96703	0.0079715	0.004865		8.33164	0.00588836	0.00399729		8.91065	0.00667495	0.00380085
8.91657	0.007128	0.00483418		8.284	0.00560646	0.00348993		8.86602	0.00676217	0.00448376
8.86848	0.00810093	0.00530161		8.23695	0.00552059	0.00360985		8.8238	0.00651926	0.00388841
8.82217	0.00684588	0.00493452		8.1887	0.00697887	0.00450353		8.78037	0.00663957	0.00400404
8.77587	0.00784664	0.00513357		8.14347	0.00598303	0.00391294		8.73574	0.00667524	0.00415575
8.73193	0.00856939	0.00549896		8.10004	0.005694	0.0033071		8.6893	0.00680677	0.00385651
8.68503	0.00858191	0.00481352		8.04878	0.00496488	0.00386817		8.64105	0.0053329	0.00423168
8.63754	0.007514	0.00491341		8.00113	0.00592801	0.00328558		8.59763	0.00710521	0.00464895
8.5942	0.008595	0.00556021		7.95047	0.00544847	0.00350047		8.54998	0.00695889	0.00457291
8.54849	0.00870075	0.00510132		7.90222	0.00472379	0.00369016		8.50595	0.00705985	0.00383514
8.49862	0.00782314	0.00490487		7.85276	0.00487925	0.00345526		8.46252	0.00689534	0.00402194
8.44993	0.00746695	0.00585401		7.80029	0.00506239	0.00336012		8.41488	0.00622948	0.00411374
8.40541	0.00873751	0.00543648		7.74902	0.0049558	0.00375401		8.36964	0.0065912	0.00471897
8.36147	0.0074324	0.00569387		7.70439	0.0051334	0.00374554		8.32199	0.00616	0.0047836
8.30864	0.00684141	0.0044719		7.65433	0.00515109	0.00340857		8.27374	0.00661516	0.00494747
8.26114	0.00776497	0.00486137		7.60728	0.00527422	0.00368154		8.2261	0.00624237	0.00474549
8.21305	0.00701785	0.00440381		7.55542	0.00523588	0.00337237		8.18086	0.00572054	0.00330973
8.16437	0.0078652	0.00480409		7.50475	0.00544525	0.00358432		8.13502	0.00598324	0.00400447
8.11925	0.00706093	0.0048203		7.45891	0.00470407	0.00314571		8.0916	0.00532265	0.0035055
8.07354	0.00802295	0.005031		7.41308	0.00470684	0.00338299		8.04335	0.00514986	0.00431081
8.02842	0.00795045	0.00491086		7.35819	0.0057096	0.00384112		7.98605	0.00562531	0.00371279
7.98389	0.00812164	0.00477731		7.30331	0.00556543	0.00382094		7.93659	0.00555799	0.00428036
7.93758	0.00648531	0.00442028		7.24963	0.00472889	0.0028893		7.88955	0.00539083	0.00397077
7.89246	0.00759805	0.00442664		7.20138	0.00581443	0.00433346		7.8407	0.00598452	0.00341043
7.84615	0.00732609	0.00415001		7.15072	0.00576932	0.00408397		7.78822	0.00637454	0.00413925
7.79569	0.00793696	0.00534966		7.10126	0.00503717	0.00374609		7.73877	0.00622917	0.00464823
7.74998	0.00798256	0.00461295		7.05361	0.00536975	0.00359069		7.6875	0.0051011	0.00387655
7.69951	0.00797342	0.00496885		6.99933	0.00409949	0.00294375		7.63262	0.00560123	0.00369748
7.65321	0.00689764	0.00447227		6.94444	0.00512394	0.00325419		7.57592	0.0051828	0.00314383
7.60868	0.00732234	0.0049089		6.89619	0.00504405	0.00401809		7.51802	0.00627661	0.00456339
7.5594	0.00767704	0.00567544		6.84071	0.00594071	0.00347812		7.46796	0.0064193	0.00409365
7.50953	0.00782802	0.00475188		6.78823	0.00513845	0.00335711		7.41911	0.00600854	0.00399456
7.46085	0.00694853	0.00522424		6.73395	0.00543869	0.00384851		7.36905	0.00644736	0.00448246
7.40801	0.00701	0.00492297		6.67726	0.00473594	0.0036426		7.3214	0.00594816	0.00354527
7.36349	0.00730598	0.00523025		6.6278	0.00461314	0.00328913		7.27677	0.00631268	0.00424129
7.31184	0.00799077	0.004414		6.57653	0.00532129	0.00377753		7.23033	0.00569438	0.00394781
7.26434	0.00743619	0.00541652		6.51863	0.00525988	0.00397093		7.17303	0.00602725	0.0040828
7.21269	0.00668216	0.00494881		6.45651	0.00494876	0.00361082		7.12056	0.00660185	0.0047843
7.1652	0.00779979	0.00427764		6.40042	0.00495422	0.0032291		7.06628	0.0056041	0.00385014
7.11473	0.00643146	0.00500976		6.34735	0.00489952	0.00398744		7.00958	0.00607492	0.00390211
7.06902	0.00665559	0.00390637		6.29005	0.00519321	0.00322963		6.95832	0.00556247	0.00375374
7.01737	0.00774699	0.00546588		6.23396	0.00471695	0.00351956		6.90946	0.00559435	0.00395083
6.96512	0.00664506	0.0040315		6.17606	0.00434428	0.00289493		6.85639	0.00524617	0.00409301
6.91229	0.0075052	0.00543408		6.126	0.00506559	0.00393952		6.8003	0.00533038	0.00331747
6.8636	0.00683403	0.00508303		6.07835	0.00601228	0.00341513		6.74782	0.00567604	0.00345492
6.81195	0.00726658	0.00473156		6.02648	0.00542884	0.00322858		6.69535	0.00652632	0.0049461
6.76743	0.00712868	0.00511778		5.96858	0.00490611	0.00385936		6.64047	0.00568261	0.0033519
6.71815	0.00615238	0.00457115		5.91068	0.00578558	0.00314334		6.58739	0.00579995	0.00437865
6.66888	0.00780248	0.00498448		5.85579	0.00389736	0.00303116		6.53914	0.0061993	0.00413736
6.62257	0.00719118	0.00448194		5.7985	0.00471393	0.00294594		6.48968	0.00587961	0.00418781
6.57626	0.00654783	0.00422049		5.74663	0.00529512	0.00391083		6.43359	0.00615471	0.00431772
6.52461	0.00628577	0.00456808		5.68933	0.00455802	0.00306868		6.3769	0.00511612	0.00319102
6.47652	0.00731373	0.00457133		5.63324	0.00490748	0.00371302		6.33106	0.00515959	0.00369477
6.43081	0.00634013	0.00499807		5.57172	0.00484875	0.00307656		6.27256	0.00558853	0.00372159
6.38509	0.00621174	0.00369438		5.51201	0.0050251	0.00344653		6.21285	0.00584108	0.00383938
6.34057	0.00771244	0.00479694		5.46074	0.00418666	0.00302059		6.16037	0.00527626	0.00343717
6.29129	0.00725908	0.00487406		5.3944	0.00399942	0.00285412		6.1067	0.00547504	0.00394346
6.24142	0.00664819	0.004202		5.34494	0.00528635	0.00395335		6.05603	0.00534766	0.00369902
6.18918	0.00732794	0.00454456		5.28041	0.00509074	0.00387154		6.00055	0.00523015	0.00357124
6.13396	0.00746319	0.00518518		5.22552	0.00486331	0.0037708		5.94445	0.00557926	0.00440148
6.07994	0.00765595	0.00447062		5.17426	0.00506821	0.00346004		5.88414	0.00558835	0.00350155
6.02888	0.00731911	0.00538507		5.11696	0.00466636	0.00392994		5.83468	0.00501399	0.00389203
5.97723	0.00602981	0.00438489		5.0669	0.0044756	0.00321896		5.78583	0.00523567	0.00374426
5.92914	0.00727204	0.00429873		5.01443	0.00481805	0.00296319		5.73517	0.00567052	0.00368439
5.88105	0.00710609	0.00490754						5.6839	0.00639942	0.00428689
								5.626	0.00506597	0.00347207
								5.5681	0.00487532	0.00326037
								5.5102	0.00535315	0.0037207
								5.44627	0.00515087	0.00426496
								5.38656	0.00579767	0.00316352
								5.33107	0.00493259	0.00340535
								5.27257	0.00546336	0.0042085
								5.21708	0.00439594	0.0033125
								5.15737	0.00476112	0.00408218
								5.10188	0.0050692	0.0036145
								5.05242	0.00470041	0.00344488
								5.00236	0.00584331	0.00438288
								4.94869	0.00521489	0.00383241
								4.88536	0.00525814	0.00355358
								4.83168	0.00406926	0.00297931
								4.7786	0.00510637	0.00358354
								4.72131	0.00517176	0.00390353
								4.6622	0.00571033	0.00398127
								4.60189	0.00451967	0.00331572
								4.54097	0.00500016	0.00342952
								4.48367	0.00521044	0.00367238
								4.42698	0.00616734	0.00442187
								4.3733	0.00509926	0.00361316
								4.31781	0.00493163	0.00349082
								4.26172	0.00506079	0.00347191
								4.19719	0.00560321	0.00398846
								4.13808	0.00532145	0.00348916
								4.07173	0.00454053	0.00367525
								4.00418	0.00496645	0.00323167
								3.94025	0.00489786	0.00320904
								3.86365	0.0056687	0.00399786
								3.80756	0.00538547	0.00359864
								3.75268	0.00555664	0.0042745
								3.69538	0.00491697	0.00375656
								3.63386	0.00482131	0.00383029
								3.57234	0.00530579	0.00339054
								3.51082	0.00499334	0.00327336
								3.45172	0.00480451	0.0029868
								3.39683	0.00486821	0.0032613
								3.33531	0.00533147	0.00371387
								3.2762	0.00473533	0.00290236
								3.21288	0.00469641	0.00360861
								3.14653	0.00470238	0.00332035

## Sheet: Figure 6 (c)
	SVF (ppm)				SVF (ppm)				SVF (ppm)
Flame height (mm)	n-heptane	standard deviation		Flame height (mm)	n-heptane-FC100	standard deviation		Flame height (mm)	n-heptane-FC500	standard deviation
41.5598	0.0448658	0.00481005		41.1867	0.0442598	0.00339157		41.326	0.0442086	0.00408195
41.5242	0.0368489	0.00951831		41.1505	0.0381745	0.00841289		41.2898	0.0401947	0.00952101
41.4886	0.0391226	0.010605		41.1143	0.0399706	0.00799933		41.2536	0.0421639	0.0108101
41.4529	0.042197	0.0118094		41.0781	0.039278	0.010654		41.2174	0.042692	0.0129686
41.4173	0.0436073	0.0138872		41.042	0.0421368	0.0115486		41.1813	0.0455283	0.0124599
41.3817	0.0454052	0.0138925		41.0058	0.0435727	0.0125492		41.1451	0.0440925	0.0126417
41.3461	0.0498337	0.0146139		40.9696	0.0427231	0.0118319		41.1089	0.0481206	0.0132122
41.3105	0.0524683	0.0140143		40.9334	0.0462879	0.0095572		41.0727	0.0494097	0.0129267
41.2748	0.0564715	0.0159272		40.8973	0.0502386	0.00990844		41.0365	0.0520419	0.0129539
41.2392	0.0601948	0.0174038		40.8611	0.0528799	0.0106533		41.0004	0.0559441	0.0129007
41.2036	0.0625908	0.0177647		40.8249	0.054871	0.0128037		40.9642	0.0570755	0.0148926
41.168	0.0672993	0.0173401		40.7887	0.055721	0.0116717		40.928	0.0585927	0.014463
41.1323	0.0720824	0.0193871		40.7525	0.0598714	0.0119902		40.8918	0.0599244	0.0139423
41.0967	0.0759708	0.0174475		40.7164	0.0623564	0.0131187		40.8556	0.0630066	0.0150462
41.0611	0.080522	0.0197054		40.6802	0.0640287	0.0138979		40.8195	0.0645684	0.0161367
41.0255	0.0841392	0.0232156		40.644	0.0701093	0.0169472		40.7833	0.0676877	0.0166351
40.9899	0.0888633	0.0239477		40.6078	0.0692216	0.015802		40.7471	0.0709883	0.0175828
40.9542	0.0921404	0.0196137		40.5716	0.0735301	0.0166018		40.7109	0.0756018	0.0176378
40.9186	0.0967999	0.0230416		40.5355	0.0782544	0.0155665		40.6747	0.0770627	0.0171563
40.883	0.102139	0.0231507		40.4993	0.0769444	0.0142241		40.6386	0.0802924	0.0172221
40.8474	0.10792	0.0264431		40.4631	0.0817542	0.0151978		40.6024	0.084427	0.0177384
40.8118	0.114344	0.0244963		40.4269	0.0859258	0.014715		40.5662	0.0880626	0.0189223
40.7761	0.123001	0.0279271		40.3907	0.0925469	0.0142291		40.53	0.0907841	0.0173175
40.7405	0.125449	0.0276812		40.3546	0.0936111	0.0160324		40.4938	0.0960857	0.019249
40.7049	0.131819	0.0290579		40.3184	0.0983165	0.0168735		40.4577	0.0966871	0.0189147
40.6693	0.141583	0.0336576		40.2822	0.100504	0.0179393		40.4215	0.100638	0.0223722
40.6337	0.146647	0.0313576		40.246	0.105725	0.0234991		40.3853	0.110105	0.0214045
40.598	0.149066	0.0352031		40.2098	0.10942	0.0213854		40.3491	0.114106	0.0230203
40.5624	0.15661	0.0342141		40.1737	0.114896	0.0211831		40.313	0.113219	0.0209932
40.5268	0.164254	0.0347195		40.1375	0.117758	0.0229026		40.2768	0.115302	0.0237664
40.4912	0.173628	0.0359874		40.1013	0.122628	0.0201736		40.2406	0.120942	0.0224949
40.4555	0.178749	0.0371893		40.0651	0.125986	0.0236179		40.2044	0.124047	0.0226857
40.4199	0.187183	0.0362891		40.0289	0.13201	0.0241756		40.1682	0.128118	0.0228115
40.3843	0.197386	0.0413585		39.9928	0.13607	0.025294		40.1321	0.131684	0.0247515
40.3487	0.204394	0.0434656		39.9566	0.143247	0.0247015		40.0959	0.137801	0.0265157
40.3131	0.214444	0.0449066		39.9204	0.150095	0.0242376		40.0597	0.143835	0.0274904
40.2774	0.223585	0.0421052		39.8842	0.156425	0.0277887		40.0235	0.147947	0.0268857
40.2418	0.230927	0.0489429		39.848	0.159947	0.0264001		39.9873	0.154773	0.0277792
40.2062	0.239722	0.043709		39.8119	0.164049	0.0302808		39.9512	0.157601	0.0291668
40.1706	0.245441	0.0445849		39.7757	0.168399	0.0269273		39.915	0.165515	0.028627
40.135	0.254122	0.0471128		39.7395	0.17547	0.0330117		39.8788	0.17218	0.0271638
40.0993	0.264978	0.04696		39.7033	0.179008	0.0326349		39.8426	0.175567	0.0271618
40.0637	0.274804	0.047639		39.6671	0.187322	0.0358434		39.8064	0.180545	0.0293428
40.0281	0.286168	0.0531046		39.631	0.190231	0.0344559		39.7703	0.186212	0.0319117
39.9925	0.299659	0.0552961		39.5948	0.199225	0.0316414		39.7341	0.191524	0.0336289
39.9569	0.308524	0.0558415		39.5586	0.20913	0.0386579		39.6979	0.195835	0.0307758
39.9212	0.31519	0.0550129		39.5224	0.21062	0.0339414		39.6617	0.203493	0.0331001
39.8856	0.328915	0.0542054		39.4863	0.212659	0.0363381		39.6255	0.207801	0.034029
39.85	0.335095	0.0565937		39.4501	0.223963	0.0397983		39.5894	0.215436	0.0346124
39.8144	0.344504	0.0641301		39.4139	0.229684	0.0448615		39.5532	0.219096	0.0336648
39.7787	0.356407	0.0617036		39.3777	0.231952	0.0472759		39.517	0.223718	0.0344798
39.7431	0.364946	0.061454		39.3415	0.242521	0.0469715		39.4808	0.229065	0.0333045
39.7075	0.374044	0.0641777		39.3054	0.24434	0.0452952		39.4446	0.236796	0.0357048
39.6719	0.386797	0.062893		39.2692	0.25452	0.0473209		39.4085	0.247182	0.0379664
39.6363	0.397611	0.0690951		39.233	0.263021	0.0457427		39.3723	0.252049	0.0402554
39.6006	0.412625	0.0733427		39.1968	0.266918	0.0437265		39.3361	0.257358	0.0399627
39.565	0.419439	0.0667193		39.1606	0.272072	0.0490559		39.2999	0.260138	0.0418979
39.5294	0.431216	0.0663432		39.1245	0.276947	0.0478604		39.2637	0.267079	0.0451636
39.4938	0.443071	0.0689039		39.0883	0.283329	0.0494865		39.2276	0.276808	0.0452046
39.4582	0.449473	0.0704956		39.0521	0.293409	0.0518453		39.1914	0.280135	0.040513
39.4225	0.464528	0.0647083		39.0159	0.299308	0.0540273		39.1552	0.288977	0.0425932
39.3869	0.472612	0.0699593		38.9797	0.301915	0.053159		39.119	0.298247	0.0423101
39.3513	0.48913	0.0630016		38.9436	0.308536	0.053884		39.0829	0.301961	0.0419134
39.3157	0.502822	0.0687127		38.9074	0.321173	0.0515706		39.0467	0.306967	0.0438324
39.28	0.513153	0.0754693		38.8712	0.329709	0.0564669		39.0105	0.309918	0.0432643
39.2444	0.527255	0.0759984		38.835	0.335368	0.0590525		38.9743	0.316897	0.0447287
39.2088	0.539773	0.0794299		38.7988	0.34431	0.0618139		38.9381	0.325663	0.0462794
39.1732	0.55294	0.0818247		38.7627	0.355485	0.0540623		38.902	0.328158	0.0462876
39.1376	0.561501	0.0788504		38.7265	0.357688	0.0524786		38.8658	0.335385	0.0486153
39.1019	0.569899	0.0763759		38.6903	0.366246	0.0569891		38.8296	0.351777	0.0451513
39.0663	0.578732	0.0757024		38.6541	0.37486	0.0556842		38.7934	0.360599	0.0493379
39.0307	0.587843	0.0786557		38.6179	0.376835	0.0618312		38.7572	0.366584	0.0477201
38.9951	0.601534	0.073942		38.5818	0.387899	0.0645063		38.7211	0.374316	0.0526408
38.9595	0.611217	0.0792911		38.5456	0.394174	0.0615036		38.6849	0.380962	0.0542126
38.9238	0.630114	0.0828008		38.5094	0.399045	0.0634532		38.6487	0.384616	0.0512014
38.8882	0.641888	0.0871486		38.4732	0.410093	0.0612243		38.6125	0.395409	0.0528542
38.8526	0.646435	0.0806717		38.437	0.415448	0.0631903		38.5763	0.396527	0.0537979
38.817	0.654722	0.0840547		38.4009	0.423277	0.0583778		38.5402	0.406003	0.0552482
38.7814	0.665155	0.0820519		38.3647	0.428341	0.0663678		38.504	0.417597	0.0531102
38.7457	0.682607	0.0837741		38.3285	0.44017	0.0639051		38.4678	0.424276	0.0540932
38.7101	0.692654	0.0846728		38.2923	0.449198	0.0733522		38.4316	0.430604	0.0561602
38.6745	0.706447	0.0841572		38.2562	0.454041	0.0692195		38.3954	0.44129	0.0613196
38.6389	0.715513	0.082065		38.22	0.464924	0.0750172		38.3593	0.447185	0.0565599
38.6032	0.726437	0.0843336		38.1838	0.471064	0.0765695		38.3231	0.455037	0.0584635
38.5676	0.739681	0.0838111		38.1476	0.480503	0.0751263		38.2869	0.460216	0.058408
38.532	0.753501	0.0885249		38.1114	0.491836	0.0813765		38.2507	0.468426	0.0546452
38.4964	0.762651	0.0868932		38.0753	0.496897	0.0785262		38.2145	0.475375	0.0588826
38.4608	0.771244	0.0835209		38.0391	0.501729	0.082572		38.1784	0.484645	0.0595471
38.4251	0.779412	0.0818594		38.0029	0.50439	0.0832496		38.1422	0.488099	0.0515993
38.3895	0.794012	0.078071		37.9667	0.518164	0.077446		38.106	0.495915	0.0559571
38.3539	0.806023	0.0762153		37.9305	0.527044	0.0827496		38.0698	0.504455	0.0551064
38.3183	0.820562	0.0861191		37.8944	0.530612	0.079862		38.0336	0.511589	0.0622602
38.2827	0.827454	0.0858988		37.8582	0.544645	0.0766013		37.9975	0.518787	0.0637067
38.247	0.838657	0.0921066		37.822	0.556288	0.0761263		37.9613	0.533136	0.0663111
38.2114	0.852585	0.0877649		37.7858	0.564831	0.0696148		37.9251	0.537763	0.0599177
38.1758	0.860482	0.0871171		37.7496	0.573606	0.079523		37.8889	0.541282	0.0632613
38.1402	0.873373	0.091408		37.7135	0.577365	0.0770495		37.8527	0.556564	0.0597568
38.1046	0.884476	0.0883312		37.6773	0.58256	0.0763951		37.8166	0.561902	0.0632543
38.0689	0.890351	0.092028		37.6411	0.589154	0.0795666		37.7804	0.570447	0.0611457
38.0333	0.897829	0.0885984		37.6049	0.595565	0.084509		37.7442	0.580415	0.0619867
37.9977	0.911559	0.089142		37.5687	0.603185	0.0794192		37.708	0.594527	0.0621027
37.9621	0.920689	0.096225		37.5326	0.608161	0.0864634		37.6719	0.595137	0.0569035
37.9264	0.92702	0.093565		37.4964	0.62018	0.0841932		37.6357	0.602406	0.057535
37.8908	0.937549	0.0942358		37.4602	0.630405	0.0848675		37.5995	0.604189	0.0585522
37.8552	0.94784	0.097706		37.424	0.637783	0.0799662		37.5633	0.609661	0.0627414
37.8196	0.956206	0.0934297		37.3878	0.648384	0.081451		37.5271	0.620954	0.0598985
37.784	0.966642	0.0896161		37.3517	0.654599	0.0876358		37.491	0.626176	0.0636627
37.7483	0.983669	0.0948593		37.3155	0.656017	0.0846324		37.4548	0.631348	0.0590834
37.7127	0.991947	0.0976062		37.2793	0.673076	0.0851997		37.4186	0.64371	0.0600633
37.6771	0.995716	0.0941238		37.2431	0.685837	0.0816552		37.3824	0.650923	0.0631361
37.6415	1.00677	0.0982377		37.2069	0.688143	0.0806637		37.3462	0.658139	0.0634459
37.6059	1.01936	0.0973078		37.1708	0.697799	0.0778786		37.3101	0.663067	0.0598161
37.5702	1.02194	0.092078		37.1346	0.703737	0.0742357		37.2739	0.674543	0.067223
37.5346	1.03223	0.101272		37.0984	0.714074	0.0839161		37.2377	0.684085	0.0688872
37.499	1.04631	0.0992084		37.0622	0.718498	0.0814362		37.2015	0.691941	0.0696928
37.4634	1.06073	0.0961556		37.026	0.731875	0.0861827		37.1653	0.700675	0.0658553
37.4277	1.07321	0.104075		36.9899	0.731082	0.0848957		37.1292	0.705995	0.0670375
37.3921	1.07733	0.104465		36.9537	0.744064	0.0851544		37.093	0.71467	0.0665582
37.3565	1.09191	0.109478		36.9175	0.751922	0.0835965		37.0568	0.724701	0.0654794
37.3209	1.10579	0.110026		36.8813	0.760471	0.0837012		37.0206	0.723061	0.0643296
37.2853	1.10722	0.116203		36.8452	0.775512	0.0847383		36.9844	0.737273	0.0696949
37.2496	1.11232	0.108584		36.809	0.776028	0.0784462		36.9483	0.74288	0.0694141
37.214	1.11087	0.114442		36.7728	0.785319	0.076864		36.9121	0.751369	0.0656162
37.1784	1.12349	0.109811		36.7366	0.790817	0.0859058		36.8759	0.754163	0.0665945
37.1428	1.13181	0.115381		36.7004	0.793059	0.0838013		36.8397	0.754171	0.0639305
37.1072	1.14401	0.111772		36.6643	0.795023	0.0856367		36.8035	0.76682	0.0635987
37.0715	1.15463	0.116593		36.6281	0.804798	0.0869426		36.7674	0.774352	0.0690124
37.0359	1.16294	0.122082		36.5919	0.807292	0.0867348		36.7312	0.784766	0.0676498
37.0003	1.17814	0.128293		36.5557	0.817876	0.0861103		36.695	0.788288	0.0716337
36.9647	1.18297	0.129466		36.5195	0.826614	0.08525		36.6588	0.793683	0.0733386
36.9291	1.19655	0.122048		36.4834	0.832287	0.0839343		36.6226	0.801021	0.0726198
36.8934	1.19473	0.130716		36.4472	0.849411	0.0844948		36.5865	0.800723	0.0747817
36.8578	1.20587	0.120244		36.411	0.851729	0.0940613		36.5503	0.806754	0.07613
36.8222	1.21771	0.117754		36.3748	0.854544	0.0804287		36.5141	0.816032	0.0756183
36.7866	1.2144	0.126939		36.3386	0.857203	0.0849068		36.4779	0.827363	0.0760294
36.7509	1.22286	0.125052		36.3025	0.861636	0.0880007		36.4418	0.833793	0.0746834
36.7153	1.23535	0.127427		36.2663	0.872421	0.0896243		36.4056	0.844891	0.0735916
36.6797	1.23916	0.124803		36.2301	0.874851	0.0917594		36.3694	0.847945	0.0755925
36.6441	1.25107	0.124864		36.1939	0.881837	0.0927248		36.3332	0.852489	0.0735621
36.6085	1.25696	0.135596		36.1577	0.88971	0.0889348		36.297	0.85909	0.0771941
36.5728	1.26408	0.120985		36.1216	0.896018	0.0912723		36.2609	0.864952	0.0834693
36.5372	1.26217	0.132076		36.0854	0.897841	0.0898306		36.2247	0.872717	0.0778345
36.5016	1.27148	0.136135		36.0492	0.899102	0.088661		36.1885	0.875081	0.0764207
36.466	1.27698	0.136205		36.013	0.909779	0.0946628		36.1523	0.880347	0.0830597
36.4304	1.28272	0.132899		35.9768	0.910805	0.089754		36.1161	0.879832	0.0753257
36.3947	1.29005	0.144795		35.9407	0.910956	0.0834264		36.08	0.888566	0.0730474
36.3591	1.30515	0.126805		35.9045	0.921213	0.0852947		36.0438	0.886701	0.0825601
36.3235	1.31342	0.122838		35.8683	0.923896	0.0886333		36.0076	0.897702	0.0779694
36.2879	1.31674	0.119809		35.8321	0.928638	0.0842636		35.9714	0.904335	0.0765995
36.2523	1.32209	0.119066		35.7959	0.930072	0.0914683		35.9352	0.911026	0.0814031
36.2166	1.32809	0.139422		35.7598	0.942723	0.086442		35.8991	0.914531	0.0803238
36.181	1.33791	0.139792		35.7236	0.946312	0.0916091		35.8629	0.917921	0.0789768
36.1454	1.33955	0.138494		35.6874	0.963144	0.0980019		35.8267	0.918973	0.0793999
36.1098	1.34956	0.136927		35.6512	0.963999	0.0889887		35.7905	0.922241	0.0834895
36.0741	1.34396	0.131432		35.6151	0.963363	0.0884424		35.7543	0.927565	0.0815858
36.0385	1.34832	0.139276		35.5789	0.979751	0.0900697		35.7182	0.932737	0.0817986
36.0029	1.35338	0.136016		35.5427	0.98471	0.0972522		35.682	0.940661	0.0818459
35.9673	1.35949	0.138641		35.5065	0.988824	0.0946929		35.6458	0.942018	0.0766856
35.9317	1.36716	0.144002		35.4703	0.991937	0.0922029		35.6096	0.947008	0.0801411
35.896	1.37513	0.139027		35.4342	1.00309	0.0849632		35.5734	0.946821	0.0748892
35.8604	1.37696	0.140857		35.398	1.00527	0.0940789		35.5373	0.956517	0.0800992
35.8248	1.37289	0.144046		35.3618	1.00819	0.0881317		35.5011	0.953283	0.0745378
35.7892	1.38588	0.144597		35.3256	1.01116	0.0831615		35.4649	0.96069	0.0824837
35.7536	1.39217	0.151563		35.2894	1.01129	0.0864602		35.4287	0.961304	0.078124
35.7179	1.39001	0.158039		35.2533	1.00512	0.0937296		35.3925	0.970691	0.0818816
35.6823	1.39471	0.151108		35.2171	1.01304	0.0813896		35.3564	0.974709	0.0813729
35.6467	1.40362	0.145782		35.1809	1.01375	0.0815869		35.3202	0.97574	0.0799595
35.6111	1.39768	0.144377		35.1447	1.01974	0.0832319		35.284	0.983893	0.0835182
35.5754	1.40538	0.152292		35.1085	1.02318	0.0849525		35.2478	0.985101	0.0858052
35.5398	1.40281	0.142288		35.0724	1.03533	0.0865155		35.2116	0.988396	0.0843593
35.5042	1.40295	0.146696		35.0362	1.04234	0.0923208		35.1755	0.98443	0.0855735
35.4686	1.41226	0.149639		35	1.04808	0.0901276		35.1393	0.989543	0.0881451
35.433	1.40685	0.158007		34.9638	1.05098	0.100624		35.1031	0.99439	0.0869741
35.3973	1.41195	0.160601		34.9276	1.05577	0.0961889		35.0669	0.993441	0.0872988
35.3617	1.42074	0.160802		34.8915	1.05465	0.0918599		35.0308	0.991781	0.0862298
35.3261	1.42382	0.155233		34.8553	1.05256	0.0837299		34.9946	0.999106	0.089072
35.2905	1.43293	0.159626		34.8191	1.06196	0.0858009		34.9584	0.997033	0.0876397
35.2549	1.42956	0.163602		34.7829	1.05462	0.0909531		34.9222	1.00408	0.0856863
35.2192	1.42872	0.166919		34.7467	1.05701	0.0869106		34.886	1.00518	0.0863416
35.1836	1.43424	0.165026		34.7106	1.06311	0.084324		34.8499	1.01314	0.0802075
35.148	1.44315	0.171498		34.6744	1.071	0.0761606		34.8137	1.01493	0.0858159
35.1124	1.44099	0.176472		34.6382	1.06115	0.0745929		34.7775	1.01372	0.0899895
35.0768	1.44831	0.17512		34.602	1.06638	0.0803446		34.7413	1.01668	0.0861295
35.0411	1.45038	0.175187		34.5658	1.06939	0.0824388		34.7051	1.02427	0.0856545
35.0055	1.45697	0.177567		34.5297	1.06988	0.0762013		34.669	1.02533	0.0818969
34.9699	1.44993	0.178205		34.4935	1.07748	0.0774792		34.6328	1.01882	0.0806748
34.9343	1.46127	0.17641		34.4573	1.08351	0.0745106		34.5966	1.03216	0.0835982
34.8986	1.46585	0.183677		34.4211	1.07411	0.0735763		34.5604	1.03323	0.0816992
34.863	1.46331	0.175064		34.3849	1.08249	0.0818731		34.5242	1.031	0.0867113
34.8274	1.4553	0.178645		34.3488	1.08919	0.0852142		34.4881	1.03273	0.0828052
34.7918	1.46229	0.175379		34.3126	1.09113	0.0806197		34.4519	1.02699	0.0874208
34.7562	1.46123	0.18069		34.2764	1.09639	0.0825938		34.4157	1.03318	0.0819985
34.7205	1.46773	0.181699		34.2402	1.0991	0.0774248		34.3795	1.03161	0.0827713
34.6849	1.46105	0.172984		34.2041	1.10966	0.0868451		34.3433	1.03307	0.0775301
34.6493	1.46698	0.190772		34.1679	1.10118	0.0760354		34.3072	1.03114	0.0741769
34.6137	1.4617	0.176112		34.1317	1.11238	0.0825205		34.271	1.0318	0.0747065
34.5781	1.46712	0.185387		34.0955	1.09884	0.0794917		34.2348	1.0426	0.0751598
34.5424	1.46391	0.184484		34.0593	1.09696	0.0821986		34.1986	1.0357	0.0802196
34.5068	1.4616	0.187549		34.0232	1.10622	0.0826444		34.1624	1.02908	0.0792553
34.4712	1.46508	0.19184		33.987	1.11175	0.0802597		34.1263	1.03505	0.0791561
34.4356	1.46964	0.188718		33.9508	1.10919	0.0776651		34.0901	1.02822	0.0813845
34.3999	1.46362	0.188886		33.9146	1.111	0.0786717		34.0539	1.0343	0.0803337
34.3643	1.466	0.188163		33.8784	1.10051	0.08166		34.0177	1.04023	0.0868876
34.3287	1.46237	0.180431		33.8423	1.10941	0.0837622		33.9815	1.04035	0.0851821
34.2931	1.4626	0.189268		33.8061	1.11879	0.0886701		33.9454	1.04188	0.0793779
34.2575	1.458	0.187538		33.7699	1.11858	0.0915215		33.9092	1.04607	0.0798052
34.2218	1.46164	0.191725		33.7337	1.11903	0.0980159		33.873	1.04159	0.0770661
34.1862	1.4675	0.208945		33.6975	1.10764	0.0901113		33.8368	1.0401	0.0794583
34.1506	1.4715	0.202241		33.6614	1.12071	0.0984238		33.8007	1.04089	0.0718438
34.115	1.47439	0.204155		33.6252	1.13169	0.0865703		33.7645	1.04123	0.0695491
34.0794	1.46966	0.208835		33.589	1.13622	0.0898271		33.7283	1.04431	0.0730311
34.0437	1.47419	0.209724		33.5528	1.12276	0.0843578		33.6921	1.04032	0.0753847
34.0081	1.46501	0.215		33.5166	1.12862	0.0848228		33.6559	1.0404	0.0754134
33.9725	1.47023	0.201089		33.4805	1.12352	0.0862365		33.6198	1.04366	0.0786049
33.9369	1.47701	0.21471		33.4443	1.1253	0.0829157		33.5836	1.04044	0.0764778
33.9013	1.4716	0.212214		33.4081	1.13165	0.0777777		33.5474	1.04727	0.0707257
33.8656	1.46922	0.213891		33.3719	1.12811	0.0868092		33.5112	1.04687	0.0726493
33.83	1.46016	0.206382		33.3357	1.12614	0.0760763		33.475	1.0502	0.0791782
33.7944	1.45843	0.2054		33.2996	1.1283	0.0788105		33.4389	1.04688	0.078365
33.7588	1.46258	0.203286		33.2634	1.135	0.0790118		33.4027	1.04655	0.0716986
33.7231	1.45994	0.206455		33.2272	1.13466	0.0856612		33.3665	1.04272	0.0721058
33.6875	1.45986	0.205579		33.191	1.13487	0.0851444		33.3303	1.0393	0.0783009
33.6519	1.46617	0.225994		33.1548	1.13451	0.0857328		33.2941	1.04577	0.0777104
33.6163	1.45403	0.214545		33.1187	1.14022	0.0895717		33.258	1.04135	0.0805
33.5807	1.45985	0.212428		33.0825	1.13486	0.0850593		33.2218	1.04632	0.0823888
33.545	1.45144	0.219791		33.0463	1.13178	0.0863395		33.1856	1.0502	0.0796298
33.5094	1.4612	0.219858		33.0101	1.12442	0.08596		33.1494	1.0468	0.0762289
33.4738	1.46015	0.213158		32.974	1.13458	0.0794435		33.1132	1.04438	0.0792704
33.4382	1.46162	0.216595		32.9378	1.13768	0.0776371		33.0771	1.04592	0.0709997
33.4026	1.45814	0.208739		32.9016	1.14296	0.0776455		33.0409	1.04222	0.0696203
33.3669	1.4592	0.218565		32.8654	1.12513	0.070402		33.0047	1.04239	0.0650712
33.3313	1.45514	0.218112		32.8292	1.13129	0.0772061		32.9685	1.04008	0.0674791
33.2957	1.44173	0.214458		32.7931	1.13744	0.086803		32.9323	1.0372	0.0641487
33.2601	1.44037	0.21789		32.7569	1.12855	0.0830958		32.8962	1.0443	0.0657619
33.2245	1.44771	0.213117		32.7207	1.13386	0.0871683		32.86	1.04797	0.0725061
33.1888	1.43893	0.21524		32.6845	1.13155	0.0756421		32.8238	1.04276	0.0753577
33.1532	1.43478	0.220846		32.6483	1.13327	0.0804898		32.7876	1.04773	0.0737413
33.1176	1.42812	0.215947		32.6122	1.13981	0.0722459		32.7514	1.04646	0.0679956
33.082	1.42473	0.203537		32.576	1.1401	0.0774845		32.7153	1.05205	0.0738065
33.0463	1.41905	0.201075		32.5398	1.13182	0.0764862		32.6791	1.05329	0.0664389
33.0107	1.42725	0.195906		32.5036	1.14064	0.0758762		32.6429	1.05415	0.0671929
32.9751	1.42615	0.205287		32.4674	1.13306	0.0762183		32.6067	1.05148	0.0665351
32.9395	1.43185	0.21199		32.4313	1.13734	0.0714465		32.5705	1.05154	0.064151
32.9039	1.41438	0.206509		32.3951	1.14432	0.0769189		32.5344	1.0534	0.0659497
32.8682	1.41766	0.204408		32.3589	1.14741	0.0825886		32.4982	1.05381	0.0649101
32.8326	1.40984	0.203696		32.3227	1.14222	0.0722826		32.462	1.04893	0.0656263
32.797	1.41394	0.203499		32.2865	1.15025	0.0741382		32.4258	1.05876	0.0677464
32.7614	1.41301	0.203002		32.2504	1.15933	0.0701071		32.3897	1.0566	0.0658754
32.7258	1.41782	0.211845		32.2142	1.16357	0.0840178		32.3535	1.0559	0.0650149
32.6901	1.4144	0.211828		32.178	1.15814	0.0735057		32.3173	1.05155	0.0670758
32.6545	1.39919	0.210797		32.1418	1.15351	0.0737053		32.2811	1.05672	0.0713868
32.6189	1.40115	0.206526		32.1056	1.15772	0.0723939		32.2449	1.05974	0.0681708
32.5833	1.39937	0.204027		32.0695	1.15115	0.0692347		32.2088	1.06336	0.0666329
32.5476	1.39147	0.210176		32.0333	1.1454	0.063749		32.1726	1.05594	0.0712663
32.512	1.38934	0.208012		31.9971	1.14723	0.061756		32.1364	1.05904	0.0675726
32.4764	1.38248	0.204914		31.9609	1.14506	0.0659727		32.1002	1.06209	0.0712397
32.4408	1.37765	0.198291		31.9247	1.14187	0.0663048		32.064	1.0641	0.067163
32.4052	1.37946	0.20581		31.8886	1.1528	0.0692939		32.0279	1.05875	0.0684745
32.3695	1.38175	0.210609		31.8524	1.15319	0.0765833		31.9917	1.05631	0.0706348
32.3339	1.37941	0.191542		31.8162	1.1506	0.067964		31.9555	1.05892	0.0635776
32.2983	1.38181	0.202307		31.78	1.15119	0.0742894		31.9193	1.06125	0.0704135
32.2627	1.37477	0.194679		31.7438	1.1469	0.0780584		31.8831	1.05116	0.062344
32.2271	1.37786	0.199784		31.7077	1.13863	0.0783059		31.847	1.04977	0.0692781
32.1914	1.38048	0.19739		31.6715	1.13968	0.0758946		31.8108	1.04738	0.0661768
32.1558	1.37718	0.191144		31.6353	1.14889	0.0767792		31.7746	1.04792	0.0588176
32.1202	1.37846	0.194839		31.5991	1.15266	0.0851409		31.7384	1.04307	0.0609309
32.0846	1.37124	0.186222		31.563	1.14753	0.0836319		31.7022	1.03641	0.0632269
32.049	1.36828	0.187344		31.5268	1.14342	0.075052		31.6661	1.04136	0.0600838
32.0133	1.3679	0.179157		31.4906	1.14922	0.0783401		31.6299	1.04463	0.0634868
31.9777	1.36201	0.177387		31.4544	1.14659	0.0760298		31.5937	1.04206	0.0636075
31.9421	1.36126	0.170998		31.4182	1.15778	0.0765812		31.5575	1.04773	0.0649696
31.9065	1.35979	0.171627		31.3821	1.15367	0.0672361		31.5213	1.04413	0.0664294
31.8708	1.35647	0.167864		31.3459	1.14862	0.0653517		31.4852	1.04365	0.0600859
31.8352	1.35315	0.175147		31.3097	1.14726	0.069082		31.449	1.03875	0.058266
31.7996	1.35048	0.173649		31.2735	1.15335	0.0779026		31.4128	1.04058	0.0570857
31.764	1.34387	0.168584		31.2373	1.14362	0.0714122		31.3766	1.03796	0.0526253
31.7284	1.3416	0.170062		31.2012	1.14301	0.085669		31.3404	1.03589	0.057415
31.6927	1.3292	0.166834		31.165	1.1434	0.0745585		31.3043	1.03642	0.0587246
31.6571	1.3284	0.164315		31.1288	1.14428	0.0707739		31.2681	1.04159	0.0629281
31.6215	1.32686	0.169364		31.0926	1.14418	0.0750803		31.2319	1.04451	0.0591789
31.5859	1.3204	0.164481		31.0564	1.14544	0.0771031		31.1957	1.0502	0.0633493
31.5503	1.3241	0.1603		31.0203	1.14599	0.0760454		31.1596	1.04933	0.0633109
31.5146	1.31937	0.154459		30.9841	1.14552	0.0737566		31.1234	1.05217	0.0637418
31.479	1.31407	0.160146		30.9479	1.14047	0.0736877		31.0872	1.05458	0.0587009
31.4434	1.30565	0.160749		30.9117	1.14604	0.0737476		31.051	1.05411	0.0602203
31.4078	1.30354	0.164251		30.8755	1.14445	0.0805835		31.0148	1.05531	0.0643049
31.3722	1.30834	0.159203		30.8394	1.12544	0.0750524		30.9787	1.06316	0.0613253
31.3365	1.2945	0.155677		30.8032	1.13963	0.0706189		30.9425	1.06577	0.0681682
31.3009	1.29822	0.15325		30.767	1.14221	0.0772614		30.9063	1.05953	0.0620297
31.2653	1.29635	0.158079		30.7308	1.13812	0.0703222		30.8701	1.0601	0.067826
31.2297	1.29539	0.157926		30.6946	1.13483	0.0801616		30.8339	1.05491	0.0690198
31.194	1.29134	0.154509		30.6585	1.13459	0.0839235		30.7978	1.05457	0.063323
31.1584	1.29545	0.146363		30.6223	1.13255	0.0741874		30.7616	1.05346	0.0715822
31.1228	1.29524	0.151289		30.5861	1.12857	0.0750566		30.7254	1.05829	0.0711754
31.0872	1.30134	0.152805		30.5499	1.12692	0.0749096		30.6892	1.05746	0.0659511
31.0516	1.29533	0.152948		30.5137	1.13105	0.0689959		30.653	1.06304	0.0690521
31.0159	1.2962	0.135402		30.4776	1.12643	0.0759578		30.6169	1.05228	0.0709462
30.9803	1.28245	0.135863		30.4414	1.1209	0.0824766		30.5807	1.05437	0.0675678
30.9447	1.27748	0.140859		30.4052	1.13004	0.085395		30.5445	1.04338	0.0662706
30.9091	1.27458	0.134785		30.369	1.12206	0.0728572		30.5083	1.04918	0.0595463
30.8735	1.27835	0.138133		30.3329	1.12638	0.0795671		30.4721	1.04337	0.0628336
30.8378	1.27334	0.134996		30.2967	1.12692	0.076861		30.436	1.03708	0.064387
30.8022	1.28418	0.130644		30.2605	1.12522	0.0758417		30.3998	1.03649	0.0656971
30.7666	1.28256	0.131005		30.2243	1.11834	0.0743693		30.3636	1.03803	0.068241
30.731	1.28238	0.130483		30.1881	1.11619	0.0759905		30.3274	1.03715	0.0646098
30.6953	1.28301	0.14058		30.152	1.11336	0.0798939		30.2912	1.036	0.0641324
30.6597	1.27846	0.134079		30.1158	1.11989	0.0893868		30.2551	1.0332	0.0684227
30.6241	1.27496	0.133162		30.0796	1.1179	0.0746515		30.2189	1.02863	0.0694993
30.5885	1.26959	0.133835		30.0434	1.10402	0.0876685		30.1827	1.02986	0.0672589
30.5529	1.27309	0.132108		30.0072	1.11249	0.0958569		30.1465	1.02418	0.0666675
30.5172	1.26436	0.12784		29.9711	1.10338	0.094483		30.1103	1.03195	0.0660266
30.4816	1.26346	0.12563		29.9349	1.10273	0.0945447		30.0742	1.02587	0.0628409
30.446	1.25394	0.120564		29.8987	1.10135	0.0887761		30.038	1.02242	0.0689945
30.4104	1.25348	0.129197		29.8625	1.09826	0.0883602		30.0018	1.02507	0.0657963
30.3748	1.24043	0.128454		29.8263	1.08883	0.0904676		29.9656	1.01743	0.0691033
30.3391	1.24716	0.124612		29.7902	1.09399	0.094967		29.9295	1.01866	0.0665528
30.3035	1.23805	0.121356		29.754	1.0902	0.0999816		29.8933	1.01653	0.0693506
30.2679	1.23843	0.121815		29.7178	1.08652	0.0990492		29.8571	1.01628	0.0646004
30.2323	1.23462	0.116505		29.6816	1.08504	0.104686		29.8209	1.01754	0.0656909
30.1967	1.23793	0.12362		29.6454	1.07416	0.0959318		29.7847	1.01681	0.0639156
30.161	1.23729	0.123656		29.6093	1.07793	0.0962053		29.7486	1.00783	0.065599
30.1254	1.23348	0.126027		29.5731	1.07193	0.099477		29.7124	1.01256	0.0617836
30.0898	1.23677	0.116991		29.5369	1.07058	0.0925427		29.6762	1.00723	0.0626543
30.0542	1.23432	0.113981		29.5007	1.06866	0.102354		29.64	1.00879	0.0640501
30.0185	1.22582	0.107676		29.4645	1.07358	0.0994331		29.6038	1.01185	0.0755994
29.9829	1.22423	0.110942		29.4284	1.07269	0.1064		29.5677	1.0035	0.0736036
29.9473	1.21633	0.109792		29.3922	1.06742	0.0988036		29.5315	1.00153	0.0681475
29.9117	1.2248	0.107989		29.356	1.06702	0.0900921		29.4953	0.996967	0.0684304
29.8761	1.20929	0.113618		29.3198	1.06107	0.108147		29.4591	0.997716	0.0749845
29.8404	1.20934	0.107952		29.2836	1.05591	0.100403		29.4229	0.993145	0.0715765
29.8048	1.21231	0.103417		29.2475	1.05848	0.103806		29.3868	0.996532	0.07538
29.7692	1.20441	0.101252		29.2113	1.05117	0.0959244		29.3506	0.988032	0.0752475
29.7336	1.20807	0.103221		29.1751	1.04423	0.0979142		29.3144	0.981031	0.0719984
29.698	1.21487	0.113057		29.1389	1.05096	0.108181		29.2782	0.980529	0.0743473
29.6623	1.20602	0.10939		29.1027	1.03534	0.104195		29.242	0.98925	0.0784273
29.6267	1.20213	0.111498		29.0666	1.03124	0.100183		29.2059	0.984341	0.0802721
29.5911	1.19239	0.110653		29.0304	1.02735	0.106418		29.1697	0.972468	0.0760768
29.5555	1.19308	0.12742		28.9942	1.02308	0.102784		29.1335	0.975113	0.074282
29.5199	1.18507	0.128258		28.958	1.0285	0.104605		29.0973	0.977954	0.0786516
29.4842	1.18087	0.123502		28.9219	1.02406	0.104418		29.0611	0.975104	0.0761737
29.4486	1.18753	0.132415		28.8857	1.01716	0.110186		29.025	0.969506	0.0739055
29.413	1.18895	0.125948		28.8495	1.0162	0.105885		28.9888	0.970318	0.0805433
29.3774	1.17703	0.123859		28.8133	1.01466	0.102709		28.9526	0.969808	0.0820661
29.3417	1.17492	0.117714		28.7771	1.00951	0.0993163		28.9164	0.961685	0.0712554
29.3061	1.17336	0.121088		28.741	1.00327	0.101497		28.8802	0.961045	0.0778267
29.2705	1.16941	0.124469		28.7048	1.00424	0.097004		28.8441	0.960451	0.081049
29.2349	1.17472	0.118953		28.6686	1.00228	0.0949587		28.8079	0.955012	0.0788973
29.1993	1.17734	0.121792		28.6324	0.994594	0.0896277		28.7717	0.948743	0.0799441
29.1636	1.17922	0.124099		28.5962	1.00091	0.0985704		28.7355	0.951517	0.0815215
29.128	1.17398	0.126811		28.5601	0.991519	0.0967982		28.6993	0.945894	0.0817244
29.0924	1.16136	0.127664		28.5239	0.987392	0.0983591		28.6632	0.948661	0.0841219
29.0568	1.15111	0.12432		28.4877	0.978906	0.101263		28.627	0.938728	0.0819682
29.0212	1.14972	0.11785		28.4515	0.986723	0.0927691		28.5908	0.939044	0.0807979
28.9855	1.14035	0.124754		28.4153	0.981892	0.0934107		28.5546	0.937715	0.0790908
28.9499	1.13689	0.124849		28.3792	0.97678	0.0950204		28.5185	0.939797	0.0806012
28.9143	1.13188	0.124232		28.343	0.966168	0.0911547		28.4823	0.938032	0.0851952
28.8787	1.13109	0.128751		28.3068	0.962012	0.0929127		28.4461	0.932722	0.0760022
28.843	1.12414	0.126835		28.2706	0.959887	0.0923971		28.4099	0.926414	0.0782993
28.8074	1.12211	0.127281		28.2344	0.956457	0.0895003		28.3737	0.921218	0.0720761
28.7718	1.11876	0.12543		28.1983	0.956425	0.0976213		28.3376	0.916097	0.0735537
28.7362	1.11985	0.120912		28.1621	0.958955	0.0944423		28.3014	0.91076	0.0790135
28.7006	1.11193	0.123555		28.1259	0.9476	0.0945759		28.2652	0.908295	0.0792291
28.6649	1.11857	0.11963		28.0897	0.947339	0.0896485		28.229	0.90242	0.0838078
28.6293	1.11026	0.125509		28.0535	0.94679	0.0894357		28.1928	0.905926	0.077743
28.5937	1.1075	0.128753		28.0174	0.94625	0.0833477		28.1567	0.899933	0.0806658
28.5581	1.10629	0.131172		27.9812	0.941601	0.0845068		28.1205	0.894144	0.0762925
28.5225	1.10525	0.137835		27.945	0.935446	0.0839423		28.0843	0.894289	0.0732039
28.4868	1.09982	0.126648		27.9088	0.930264	0.0844474		28.0481	0.888044	0.0790617
28.4512	1.10595	0.132845		27.8726	0.926613	0.0871067		28.0119	0.894053	0.08134
28.4156	1.09489	0.128602		27.8365	0.930422	0.0889411		27.9758	0.882884	0.0732344
28.38	1.08865	0.140183		27.8003	0.928661	0.078032		27.9396	0.881666	0.0807658
28.3444	1.08426	0.135		27.7641	0.914955	0.0829045		27.9034	0.879821	0.0792133
28.3087	1.0849	0.134466		27.7279	0.915869	0.0806779		27.8672	0.875902	0.0788394
28.2731	1.07237	0.131553		27.6918	0.915626	0.0869621		27.831	0.87068	0.0738
28.2375	1.07471	0.133371		27.6556	0.910555	0.0883464		27.7949	0.870181	0.0765053
28.2019	1.0698	0.132592		27.6194	0.911204	0.0851734		27.7587	0.866467	0.0725784
28.1662	1.06307	0.135059		27.5832	0.905872	0.0833608		27.7225	0.861363	0.0692589
28.1306	1.06513	0.133006		27.547	0.899001	0.0795404		27.6863	0.860489	0.0664861
28.095	1.06687	0.134071		27.5109	0.896219	0.0889108		27.6501	0.858841	0.0722218
28.0594	1.05496	0.135922		27.4747	0.886489	0.0885198		27.614	0.859828	0.0698451
28.0238	1.04874	0.135987		27.4385	0.891423	0.091371		27.5778	0.853484	0.0757762
27.9881	1.04966	0.130154		27.4023	0.888392	0.0912351		27.5416	0.854942	0.0773108
27.9525	1.04753	0.134141		27.3661	0.888083	0.0899209		27.5054	0.848093	0.076596
27.9169	1.04534	0.137408		27.33	0.882589	0.0857598		27.4692	0.851115	0.0791859
27.8813	1.03475	0.13287		27.2938	0.882877	0.0860178		27.4331	0.847531	0.0758668
27.8457	1.03429	0.138015		27.2576	0.880961	0.0800897		27.3969	0.841642	0.0784906
27.81	1.02855	0.136176		27.2214	0.874268	0.0829239		27.3607	0.837207	0.0758894
27.7744	1.03077	0.138117		27.1852	0.869493	0.0813655		27.3245	0.835096	0.074404
27.7388	1.02124	0.137149		27.1491	0.869196	0.0858312		27.2884	0.836388	0.0765982
27.7032	1.02423	0.139486		27.1129	0.87168	0.0843914		27.2522	0.833032	0.070239
27.6676	1.01891	0.138149		27.0767	0.858729	0.0758285		27.216	0.824572	0.0690234
27.6319	1.00886	0.136081		27.0405	0.860033	0.0851624		27.1798	0.823544	0.0713031
27.5963	1.0071	0.14348		27.0043	0.857356	0.0832937		27.1436	0.813662	0.0767378
27.5607	1.00271	0.142145		26.9682	0.852961	0.088508		27.1075	0.807775	0.0681658
27.5251	1.00291	0.142918		26.932	0.845563	0.0892077		27.0713	0.803991	0.0656665
27.4894	1.0023	0.148977		26.8958	0.846012	0.0888264		27.0351	0.800465	0.0647246
27.4538	0.996839	0.142144		26.8596	0.845258	0.0876366		26.9989	0.800456	0.0670781
27.4182	0.995831	0.140757		26.8234	0.837437	0.0818759		26.9627	0.795223	0.0650016
27.3826	0.98878	0.140897		26.7873	0.837386	0.0839586		26.9266	0.794004	0.0607521
27.347	0.981336	0.14806		26.7511	0.826542	0.0848202		26.8904	0.78816	0.065495
27.3113	0.976083	0.146073		26.7149	0.827004	0.0846359		26.8542	0.785787	0.0697432
27.2757	0.966686	0.143879		26.6787	0.82384	0.0779275		26.818	0.788992	0.0768161
27.2401	0.961605	0.145268		26.6425	0.826695	0.0776278		26.7818	0.780674	0.0745884
27.2045	0.9589	0.145885		26.6064	0.821137	0.0778846		26.7457	0.782786	0.0743687
27.1689	0.960378	0.14161		26.5702	0.818121	0.0829287		26.7095	0.779151	0.0741603
27.1332	0.948961	0.144095		26.534	0.816875	0.0838001		26.6733	0.773883	0.0724788
27.0976	0.94512	0.138926		26.4978	0.810912	0.082934		26.6371	0.767807	0.0706062
27.062	0.941631	0.134897		26.4616	0.803374	0.0841443		26.6009	0.765682	0.0730619
27.0264	0.931547	0.138531		26.4255	0.798599	0.0880772		26.5648	0.761136	0.0727828
26.9907	0.930198	0.129796		26.3893	0.798865	0.0823576		26.5286	0.759538	0.0739319
26.9551	0.928501	0.13788		26.3531	0.798838	0.0906509		26.4924	0.754266	0.0754888
26.9195	0.921352	0.142247		26.3169	0.798847	0.0861764		26.4562	0.754252	0.0729138
26.8839	0.917742	0.141367		26.2808	0.788053	0.0866264		26.42	0.752564	0.0787574
26.8483	0.914276	0.139579		26.2446	0.785486	0.0902256		26.3839	0.752852	0.0763856
26.8126	0.899042	0.136875		26.2084	0.781445	0.0896897		26.3477	0.752137	0.0794124
26.777	0.904682	0.141653		26.1722	0.769825	0.0908017		26.3115	0.747971	0.0754454
26.7414	0.898051	0.131283		26.136	0.767074	0.0892182		26.2753	0.741019	0.0780185
26.7058	0.894048	0.133325		26.0999	0.769639	0.0880818		26.2391	0.737291	0.0789498
26.6702	0.891163	0.129895		26.0637	0.76128	0.090262		26.203	0.73923	0.0780863
26.6345	0.884636	0.128574		26.0275	0.762475	0.0913418		26.1668	0.731294	0.0808268
26.5989	0.879413	0.130224		25.9913	0.764876	0.0897028		26.1306	0.729124	0.0761875
26.5633	0.870503	0.132955		25.9551	0.750453	0.0889839		26.0944	0.726717	0.0731546
26.5277	0.867245	0.130611		25.919	0.750806	0.0923076		26.0582	0.721281	0.0731539
26.4921	0.861318	0.13783		25.8828	0.747429	0.0911451		26.0221	0.721673	0.0768668
26.4564	0.85241	0.139351		25.8466	0.746673	0.0872266		25.9859	0.714095	0.0732814
26.4208	0.849588	0.136003		25.8104	0.737336	0.0921226		25.9497	0.713296	0.0743669
26.3852	0.849475	0.141735		25.7742	0.737138	0.08787		25.9135	0.710696	0.0736001
26.3496	0.840719	0.1405		25.7381	0.73058	0.0842067		25.8774	0.706843	0.0791875
26.3139	0.843068	0.137549		25.7019	0.724126	0.0854271		25.8412	0.705527	0.0763515
26.2783	0.82745	0.132927		25.6657	0.712947	0.0900684		25.805	0.699216	0.0721792
26.2427	0.823807	0.133516		25.6295	0.7135	0.091946		25.7688	0.693114	0.0743166
26.2071	0.822133	0.141948		25.5933	0.702245	0.0897058		25.7326	0.687973	0.0738964
26.1715	0.813716	0.141612		25.5572	0.705028	0.0909085		25.6965	0.680277	0.0785438
26.1358	0.807172	0.138818		25.521	0.691403	0.0880026		25.6603	0.679733	0.0765646
26.1002	0.804736	0.141013		25.4848	0.689747	0.0908765		25.6241	0.67177	0.0766559
26.0646	0.799641	0.136563		25.4486	0.686593	0.0863851		25.5879	0.667371	0.0792479
26.029	0.789379	0.139478		25.4124	0.686727	0.0932689		25.5517	0.661572	0.0731518
25.9934	0.77542	0.136453		25.3763	0.674496	0.0919971		25.5156	0.659539	0.0709673
25.9577	0.776317	0.139624		25.3401	0.675676	0.0936368		25.4794	0.662361	0.072981
25.9221	0.769911	0.134739		25.3039	0.665595	0.0892748		25.4432	0.653538	0.0755659
25.8865	0.7599	0.136145		25.2677	0.665157	0.0981094		25.407	0.654207	0.0768327
25.8509	0.75965	0.138131		25.2315	0.656903	0.0993535		25.3708	0.649726	0.0775843
25.8152	0.754967	0.131082		25.1954	0.654988	0.0936691		25.3347	0.646574	0.082625
25.7796	0.748631	0.131301		25.1592	0.646784	0.0993504		25.2985	0.642449	0.0836217
25.744	0.743232	0.128084		25.123	0.644821	0.0997848		25.2623	0.634418	0.0791002
25.7084	0.734418	0.124368		25.0868	0.635144	0.105402		25.2261	0.634554	0.0831043
25.6728	0.733632	0.132901		25.0507	0.631693	0.106643		25.1899	0.622447	0.0843668
25.6371	0.725512	0.132308		25.0145	0.627539	0.104328		25.1538	0.62777	0.0834315
25.6015	0.713177	0.127743		24.9783	0.622142	0.10062		25.1176	0.615181	0.0824144
25.5659	0.707271	0.126017		24.9421	0.613488	0.102218		25.0814	0.613755	0.078375
25.5303	0.70847	0.126482		24.9059	0.606293	0.102438		25.0452	0.605396	0.0788647
25.4947	0.708796	0.139009		24.8698	0.600474	0.0957634		25.009	0.605208	0.0821194
25.459	0.700792	0.132968		24.8336	0.594959	0.101498		24.9729	0.607689	0.0858902
25.4234	0.69587	0.135828		24.7974	0.585611	0.101913		24.9367	0.594926	0.0842552
25.3878	0.681971	0.132164		24.7612	0.584908	0.100373		24.9005	0.589762	0.0842326
25.3522	0.681003	0.136984		24.725	0.579778	0.107005		24.8643	0.588237	0.0884495
25.3166	0.668833	0.133841		24.6889	0.578994	0.105921		24.8281	0.584139	0.0870956
25.2809	0.65978	0.132509		24.6527	0.566902	0.103659		24.792	0.580586	0.0916585
25.2453	0.657362	0.134708		24.6165	0.566593	0.105192		24.7558	0.573814	0.0917004
25.2097	0.652054	0.129034		24.5803	0.558035	0.105655		24.7196	0.570145	0.0883197
25.1741	0.645799	0.127921		24.5441	0.552588	0.108426		24.6834	0.562702	0.0894722
25.1384	0.641721	0.131976		24.508	0.543386	0.101223		24.6473	0.552774	0.0890577
25.1028	0.629711	0.131535		24.4718	0.541097	0.107337		24.6111	0.552059	0.0912414
25.0672	0.625914	0.131683		24.4356	0.532418	0.108825		24.5749	0.547216	0.0913246
25.0316	0.618294	0.134105		24.3994	0.530413	0.115483		24.5387	0.543098	0.0935078
24.996	0.61283	0.134335		24.3632	0.524074	0.117262		24.5025	0.537847	0.0919874
24.9603	0.607175	0.13545		24.3271	0.515665	0.112358		24.4664	0.533132	0.09161
24.9247	0.600803	0.133888		24.2909	0.506369	0.118184		24.4302	0.52473	0.0922161
24.8891	0.594588	0.136382		24.2547	0.501782	0.111946		24.394	0.527522	0.092775
24.8535	0.590447	0.134875		24.2185	0.491747	0.111844		24.3578	0.523993	0.0946878
24.8179	0.585498	0.13271		24.1823	0.487607	0.114296		24.3216	0.514124	0.0936761
24.7822	0.577545	0.134659		24.1462	0.482444	0.110882		24.2855	0.512485	0.0930519
24.7466	0.574559	0.138829		24.11	0.478717	0.112335		24.2493	0.503695	0.0943572
24.711	0.567065	0.133268		24.0738	0.46981	0.107625		24.2131	0.500572	0.0933109
24.6754	0.560016	0.128462		24.0376	0.467026	0.109889		24.1769	0.494689	0.0946158
24.6398	0.556296	0.130527		24.0014	0.457597	0.111474		24.1407	0.490736	0.0959617
24.6041	0.5445	0.124907		23.9653	0.453578	0.110333		24.1046	0.486334	0.0891656
24.5685	0.535593	0.127754		23.9291	0.447101	0.110393		24.0684	0.476286	0.0916751
24.5329	0.52923	0.125328		23.8929	0.440793	0.108058		24.0322	0.468742	0.0914329
24.4973	0.519121	0.124192		23.8567	0.434161	0.108425		23.996	0.468009	0.0936332
24.4616	0.518552	0.122353		23.8205	0.430195	0.110845		23.9598	0.462293	0.0904161
24.426	0.51043	0.124701		23.7844	0.4228	0.112156		23.9237	0.455265	0.095114
24.3904	0.502879	0.124669		23.7482	0.417259	0.110499		23.8875	0.45095	0.0893501
24.3548	0.496419	0.123676		23.712	0.418358	0.113547		23.8513	0.442095	0.0940355
24.3192	0.49145	0.125851		23.6758	0.405042	0.109679		23.8151	0.437331	0.0890507
24.2835	0.480797	0.129243		23.6397	0.401101	0.111507		23.7789	0.434048	0.091521
24.2479	0.476883	0.131814		23.6035	0.39786	0.109154		23.7428	0.424156	0.0927329
24.2123	0.470092	0.12566		23.5673	0.385316	0.106593		23.7066	0.419075	0.0878715
24.1767	0.464468	0.127356		23.5311	0.380564	0.113829		23.6704	0.41493	0.0938332
24.1411	0.45541	0.126112		23.4949	0.37568	0.108948		23.6342	0.407533	0.0924644
24.1054	0.448509	0.12542		23.4588	0.370255	0.109726		23.598	0.397357	0.0961099
24.0698	0.444788	0.132813		23.4226	0.357925	0.103607		23.5619	0.397362	0.0947588
24.0342	0.431726	0.126887		23.3864	0.351219	0.107626		23.5257	0.390616	0.0988024
23.9986	0.426228	0.127109		23.3502	0.349701	0.104223		23.4895	0.384396	0.0961815
23.9629	0.419682	0.126931		23.314	0.340556	0.103369		23.4533	0.376908	0.0925227
23.9273	0.414602	0.124174		23.2779	0.331306	0.101249		23.4171	0.371451	0.0953713
23.8917	0.403821	0.120812		23.2417	0.325561	0.105059		23.381	0.368761	0.0969492
23.8561	0.400272	0.119519		23.2055	0.321061	0.103699		23.3448	0.361253	0.0955193
23.8205	0.391833	0.120749		23.1693	0.316823	0.100108		23.3086	0.355919	0.0924546
23.7848	0.387687	0.127108		23.1331	0.310998	0.101898		23.2724	0.351697	0.0924395
23.7492	0.3774	0.122802		23.097	0.305813	0.0999825		23.2363	0.344375	0.091631
23.7136	0.371439	0.122582		23.0608	0.301428	0.0969436		23.2001	0.339394	0.0902112
23.678	0.36527	0.121943		23.0246	0.294163	0.0979014		23.1639	0.335023	0.0891569
23.6424	0.357062	0.122464		22.9884	0.289463	0.0959659		23.1277	0.329827	0.088102
23.6067	0.35066	0.116314		22.9522	0.285715	0.095019		23.0915	0.322818	0.0887629
23.5711	0.342763	0.118126		22.9161	0.282969	0.0913372		23.0554	0.318376	0.0868834
23.5355	0.340649	0.118346		22.8799	0.278704	0.0971921		23.0192	0.31541	0.0886706
23.4999	0.328527	0.11411		22.8437	0.273856	0.0981155		22.983	0.307378	0.0865916
23.4643	0.321149	0.111847		22.8075	0.267601	0.0912617		22.9468	0.300002	0.085806
23.4286	0.314427	0.109923		22.7713	0.263513	0.095591		22.9106	0.296766	0.0860069
23.393	0.311099	0.113916		22.7352	0.256791	0.0947834		22.8745	0.290148	0.0872963
23.3574	0.304327	0.107905		22.699	0.252919	0.0953663		22.8383	0.286693	0.0885939
23.3218	0.298737	0.111906		22.6628	0.244793	0.0893589		22.8021	0.283651	0.084317
23.2861	0.291524	0.109885		22.6266	0.239377	0.0886064		22.7659	0.273659	0.0802299
23.2505	0.28407	0.110342		22.5904	0.236434	0.0908019		22.7297	0.272853	0.0824887
23.2149	0.27843	0.107406		22.5543	0.232312	0.090947		22.6936	0.269937	0.0791794
23.1793	0.273739	0.106429		22.5181	0.227332	0.0903729		22.6574	0.26314	0.0791606
23.1437	0.270975	0.110356		22.4819	0.223309	0.090554		22.6212	0.254665	0.0781977
23.108	0.265427	0.10516		22.4457	0.216515	0.0846317		22.585	0.25061	0.0788926
23.0724	0.256483	0.0988597		22.4096	0.211578	0.0850699		22.5488	0.244659	0.0752335
23.0368	0.249191	0.10001		22.3734	0.206795	0.0846938		22.5127	0.237209	0.0745081
23.0012	0.244146	0.0999144		22.3372	0.20333	0.0890027		22.4765	0.234067	0.0727307
22.9656	0.239091	0.0995784		22.301	0.196626	0.0849195		22.4403	0.224805	0.0722486
22.9299	0.231472	0.0954799		22.2648	0.1919	0.0860155		22.4041	0.222513	0.0703132
22.8943	0.222229	0.0905987		22.2287	0.187575	0.0815465		22.3679	0.219018	0.0738899
22.8587	0.216569	0.0895826		22.1925	0.180143	0.0794613		22.3318	0.211268	0.0726787
22.8231	0.212851	0.0872584		22.1563	0.178216	0.0798193		22.2956	0.20836	0.0726792
22.7875	0.205853	0.0861911		22.1201	0.175453	0.0775403		22.2594	0.204959	0.0690718
22.7518	0.197354	0.0843327		22.0839	0.171689	0.0734085		22.2232	0.19603	0.0661775
22.7162	0.197515	0.0821223		22.0478	0.165372	0.0726811		22.187	0.192991	0.0673715
22.6806	0.189266	0.0796538		22.0116	0.163701	0.0734122		22.1509	0.190061	0.0639693
22.645	0.187988	0.0785888		21.9754	0.158456	0.0714901		22.1147	0.184713	0.0642388
22.6093	0.181323	0.0773507		21.9392	0.154021	0.0742327		22.0785	0.181248	0.0624075
22.5737	0.178384	0.0764473		21.903	0.152183	0.0736877		22.0423	0.176844	0.0595675
22.5381	0.170486	0.0726277		21.8669	0.147294	0.0697771		22.0062	0.16972	0.0594426
22.5025	0.167867	0.0713027		21.8307	0.145839	0.0720372		21.97	0.166715	0.0609843
22.4669	0.160858	0.0693891		21.7945	0.141777	0.0683311		21.9338	0.162607	0.0584703
22.4312	0.156667	0.0674969		21.7583	0.138497	0.0638282		21.8976	0.156042	0.0577649
22.3956	0.150443	0.0648029		21.7221	0.139313	0.0623735		21.8614	0.155133	0.0607882
22.36	0.147858	0.066078		21.686	0.131241	0.0599759		21.8253	0.147657	0.0557174
22.3244	0.143367	0.0634184		21.6498	0.131098	0.0566028		21.7891	0.146911	0.0565763
22.2888	0.136042	0.0587734		21.6136	0.125603	0.0583241		21.7529	0.141324	0.051789
22.2531	0.136754	0.0608639		21.5774	0.123239	0.0584569		21.7167	0.138598	0.0513105
22.2175	0.132779	0.056942		21.5412	0.120014	0.0582566		21.6805	0.135072	0.0499836
22.1819	0.128793	0.0586065		21.5051	0.117293	0.0592442		21.6444	0.129571	0.0519659
22.1463	0.12416	0.0540147		21.4689	0.113131	0.058332		21.6082	0.126537	0.0493441
22.1106	0.120251	0.0515144		21.4327	0.110723	0.0544278		21.572	0.125448	0.049291
22.075	0.119763	0.0499641		21.3965	0.107681	0.053472		21.5358	0.12141	0.0481513
22.0394	0.115626	0.0484421		21.3603	0.104518	0.0517095		21.4996	0.116434	0.0449656
22.0038	0.111888	0.0482648		21.3242	0.0995595	0.0471891		21.4635	0.114578	0.0459346
21.9682	0.107931	0.0466791		21.288	0.0980213	0.0484893		21.4273	0.112439	0.0451732
21.9325	0.103855	0.0414328		21.2518	0.0959353	0.048585		21.3911	0.110747	0.0421334
21.8969	0.102998	0.0391221		21.2156	0.0946886	0.0453785		21.3549	0.104505	0.0406647
21.8613	0.100969	0.0406582		21.1795	0.0938155	0.0479112		21.3187	0.101317	0.041794
21.8257	0.0943927	0.0365543		21.1433	0.0906054	0.0414156		21.2826	0.0988111	0.0414694
21.7901	0.0956965	0.0396962		21.1071	0.0873975	0.0426325		21.2464	0.0970485	0.0391981
21.7544	0.0924372	0.0379848		21.0709	0.0849626	0.0419365		21.2102	0.094007	0.0398717
21.7188	0.0904121	0.03551		21.0347	0.082141	0.0422693		21.174	0.0917321	0.037647
21.6832	0.0895984	0.0333374		20.9986	0.0798581	0.0401138		21.1378	0.0898523	0.0359126
21.6476	0.0840804	0.0341912		20.9624	0.0768832	0.041467		21.1017	0.0871814	0.0355442
21.612	0.0872645	0.0322871		20.9262	0.0776519	0.0363885		21.0655	0.0831845	0.0343314
21.5763	0.0803036	0.0294891		20.89	0.0763068	0.0365065		21.0293	0.0814123	0.0320106
21.5407	0.079147	0.0285218		20.8538	0.0758547	0.0358782		20.9931	0.0786018	0.0298002
21.5051	0.0798343	0.0305255		20.8177	0.0718016	0.0318861		20.9569	0.0770908	0.0297052
21.4695	0.0755857	0.0251093		20.7815	0.0694008	0.0343203		20.9208	0.076621	0.0285109
21.4338	0.0746988	0.0271231		20.7453	0.0694972	0.0320626		20.8846	0.0736466	0.0287343
21.3982	0.0733474	0.0251989		20.7091	0.0670734	0.0292011		20.8484	0.0733511	0.0274232
21.3626	0.0705516	0.0218343		20.6729	0.0659411	0.0302809		20.8122	0.0686695	0.026974
21.327	0.0650821	0.0190834		20.6368	0.0638344	0.0331462		20.776	0.0684473	0.0254757
21.2914	0.0676313	0.0222575		20.6006	0.0643595	0.0302014		20.7399	0.0680185	0.0232521
21.2557	0.065155	0.0214612		20.5644	0.0614158	0.0285361		20.7037	0.0651652	0.0243052
21.2201	0.066056	0.0222005		20.5282	0.0620254	0.0291315		20.6675	0.0634351	0.022523
21.1845	0.0631749	0.0224992		20.492	0.0612839	0.0258978		20.6313	0.0629617	0.0227473
21.1489	0.063974	0.0230262		20.4559	0.0594009	0.0246223		20.5952	0.0637435	0.0217791
21.1133	0.0626941	0.0199077		20.4197	0.0611432	0.0248646		20.559	0.0593658	0.0215004
21.0776	0.0609588	0.0206086		20.3835	0.0603223	0.0233881		20.5228	0.0586641	0.0189148
21.042	0.0616262	0.0191855		20.3473	0.0542776	0.0215792		20.4866	0.0561186	0.019879
21.0064	0.057602	0.0187478		20.3111	0.0565343	0.0216327		20.4504	0.0563079	0.0180426
20.9708	0.0574266	0.0172431		20.275	0.0531577	0.0206545		20.4143	0.054798	0.0169089
20.9352	0.0564111	0.0167538		20.2388	0.0538156	0.0204195		20.3781	0.0554059	0.0152487
20.8995	0.0539324	0.0187406		20.2026	0.0503198	0.021028		20.3419	0.0519828	0.0175835
20.8639	0.0551021	0.0174581		20.1664	0.0501552	0.0167825		20.3057	0.0528949	0.016722
20.8283	0.052419	0.0158339		20.1302	0.0502128	0.0182387		20.2695	0.0509279	0.0164043
20.7927	0.0543781	0.0141856		20.0941	0.0513604	0.0185989		20.2334	0.0503939	0.0157827
20.757	0.0531789	0.015716		20.0579	0.0492522	0.0166664		20.1972	0.0500926	0.0144858
20.7214	0.0529739	0.0155456		20.0217	0.0496358	0.0170409		20.161	0.0512149	0.0141603
20.6858	0.0507503	0.0139232		19.9855	0.0484687	0.0156879		20.1248	0.049094	0.016037
20.6502	0.0510142	0.0131622		19.9493	0.0471759	0.0190364		20.0886	0.0482665	0.0139405
20.6146	0.0507712	0.0141747		19.9132	0.0473971	0.0161981		20.0525	0.0453751	0.0144574
20.5789	0.0509302	0.0131553		19.877	0.0434942	0.0165275		20.0163	0.0447359	0.0130555
20.5433	0.0489891	0.0148341		19.8408	0.0449044	0.0152477		19.9801	0.044924	0.0122413
20.5077	0.0509123	0.0149972		19.8046	0.0436699	0.0144558		19.9439	0.0443292	0.0138226
20.4721	0.0483604	0.0143446		19.7685	0.0433857	0.0155247		19.9077	0.0424433	0.0121851
20.4365	0.0483319	0.0122505		19.7323	0.0435745	0.0133515		19.8716	0.041947	0.0108929
20.4008	0.0465086	0.0141751		19.6961	0.0442531	0.0121216		19.8354	0.0427938	0.0114162
20.3652	0.0474149	0.0146684		19.6599	0.043564	0.0135582		19.7992	0.0412133	0.0119438
20.3296	0.0472937	0.013415		19.6237	0.0422652	0.0131003		19.763	0.0424647	0.0114823
20.294	0.0452796	0.0125267		19.5876	0.0428156	0.0124538		19.7268	0.0400123	0.00954966
20.2583	0.0474022	0.0132228		19.5514	0.0419209	0.0129828		19.6907	0.0396354	0.0112715
20.2227	0.0463273	0.0107623		19.5152	0.0389363	0.0112949		19.6545	0.0396371	0.0103121
20.1871	0.043219	0.0130163		19.479	0.0401288	0.0128714		19.6183	0.0400236	0.0108956
20.1515	0.0446317	0.0109984		19.4428	0.0402133	0.0116479		19.5821	0.040043	0.0119654
20.1159	0.0440078	0.0143668		19.4067	0.0398667	0.0117222		19.5459	0.0387577	0.00870531
20.0802	0.0440811	0.0135265		19.3705	0.0401671	0.00929902		19.5098	0.0373121	0.00883748
20.0446	0.04343	0.0111845		19.3343	0.0385359	0.0101185		19.4736	0.039479	0.00961577
20.009	0.0438607	0.0105851		19.2981	0.0382341	0.0118198		19.4374	0.0376326	0.00928083
19.9734	0.0422171	0.0104475		19.2619	0.0373086	0.00908566		19.4012	0.0348678	0.00799533
19.9378	0.0414056	0.0118368		19.2258	0.0369633	0.0111754		19.3651	0.0359789	0.00843561
19.9021	0.0391763	0.0117138		19.1896	0.0372593	0.0123782		19.3289	0.0361406	0.00958824
19.8665	0.0400321	0.0102905		19.1534	0.035837	0.00986117		19.2927	0.035508	0.00970023
19.8309	0.0424894	0.0134458		19.1172	0.0382177	0.00971272		19.2565	0.0360873	0.00952214
19.7953	0.0387534	0.0101857		19.081	0.0352633	0.0114434		19.2203	0.0347424	0.00882378
19.7597	0.0398325	0.00973727		19.0449	0.0372039	0.00968521		19.1842	0.0336032	0.0091066
19.724	0.0408054	0.0134066		19.0087	0.0346955	0.0110385		19.148	0.0342904	0.010278
19.6884	0.0387436	0.00995955		18.9725	0.0343779	0.0105453		19.1118	0.0329522	0.00761655
19.6528	0.039373	0.0100173		18.9363	0.032811	0.00732622		19.0756	0.0333323	0.00856619
19.6172	0.0385363	0.0113579		18.9001	0.0339621	0.00910348		19.0394	0.032224	0.00769797
19.5815	0.037288	0.0108563		18.864	0.035886	0.00946568		19.0033	0.0324227	0.00861579
19.5459	0.0386473	0.0107996		18.8278	0.0337394	0.00949211		18.9671	0.0314591	0.00747485
19.5103	0.038387	0.0116784		18.7916	0.0353676	0.0102387		18.9309	0.0308071	0.00971441
19.4747	0.0367859	0.0116992		18.7554	0.0318671	0.00810721		18.8947	0.0333645	0.00824423
19.4391	0.0365431	0.0102102		18.7192	0.0325882	0.00895464		18.8585	0.0314546	0.00727499
19.4034	0.0356877	0.00996827		18.6831	0.0320317	0.0100925		18.8224	0.0322924	0.00880107
19.3678	0.0386161	0.0111569		18.6469	0.0326416	0.00796333		18.7862	0.0317961	0.00843165
19.3322	0.0350283	0.0088346		18.6107	0.0329519	0.00961964		18.75	0.0312569	0.00636035
19.2966	0.0370926	0.0109369		18.5745	0.0316378	0.00802087		18.7138	0.0288054	0.00899544
19.261	0.0349605	0.0103234		18.5384	0.0309024	0.00745427		18.6776	0.0304737	0.00709009
19.2253	0.0348041	0.0104225		18.5022	0.0321746	0.00808633		18.6415	0.0296938	0.00811208
19.1897	0.035772	0.00990311		18.466	0.0305504	0.00740537		18.6053	0.0285217	0.00874006
19.1541	0.0349655	0.0112742		18.4298	0.0314159	0.00721515		18.5691	0.0282795	0.00799206
19.1185	0.0344495	0.00935969		18.3936	0.0310086	0.00785854		18.5329	0.0284305	0.00669162
19.0829	0.0345014	0.0119638		18.3575	0.0314435	0.00709385		18.4967	0.0295121	0.00831913
19.0472	0.0333463	0.00866798		18.3213	0.0299522	0.00700812		18.4606	0.0288926	0.00753084
19.0116	0.0348369	0.00930127		18.2851	0.0308263	0.00690492		18.4244	0.0288176	0.00835113
18.976	0.0336194	0.0104823		18.2489	0.0296577	0.00792279		18.3882	0.0291263	0.00803236
18.9404	0.0331351	0.00883386		18.2127	0.0301788	0.00912293		18.352	0.0283104	0.00839026
18.9047	0.0315752	0.00993769		18.1766	0.0289253	0.0101873		18.3158	0.0281869	0.00760138
18.8691	0.0330409	0.0108661		18.1404	0.0302568	0.00880191		18.2797	0.028137	0.00758181
18.8335	0.0314805	0.00881777		18.1042	0.0285846	0.0092248		18.2435	0.0267857	0.00711979
18.7979	0.0327741	0.00978846		18.068	0.0304251	0.00905948		18.2073	0.0272532	0.00795758
18.7623	0.0302521	0.00957396		18.0318	0.0270133	0.00791593		18.1711	0.0259604	0.00790922
18.7266	0.0321489	0.00910612		17.9957	0.0279183	0.00843962		18.1349	0.0281078	0.00758952
18.691	0.0289915	0.0104647		17.9595	0.0275145	0.00665191		18.0988	0.0274995	0.00754896
18.6554	0.0308591	0.0108545		17.9233	0.0301558	0.00759266		18.0626	0.0296025	0.0088194
18.6198	0.0309981	0.00953223		17.8871	0.028744	0.00631561		18.0264	0.0278966	0.00759832
18.5842	0.03114	0.00967827		17.8509	0.0282349	0.00680108		17.9902	0.0261789	0.0081454
18.5485	0.0307649	0.00980861		17.8148	0.029603	0.0083128		17.9541	0.0269187	0.00765833
18.5129	0.031281	0.0100041		17.7786	0.0290079	0.00790402		17.9179	0.0269176	0.00841244
18.4773	0.03093	0.0104965		17.7424	0.0290432	0.0076909		17.8817	0.0257456	0.00680051
18.4417	0.0305501	0.0107334		17.7062	0.0291744	0.00739303		17.8455	0.0261773	0.00771031
18.406	0.030366	0.0110682		17.67	0.0268812	0.00765272		17.8093	0.0252068	0.00680232
18.3704	0.0295781	0.0112784		17.6339	0.0285416	0.00881107		17.7732	0.0252594	0.00746576
18.3348	0.028892	0.00975465		17.5977	0.0261918	0.00882484		17.737	0.0264032	0.00846813
18.2992	0.0293018	0.00954888		17.5615	0.0260743	0.00933326		17.7008	0.0252448	0.00757165
18.2636	0.027155	0.00965454		17.5253	0.026422	0.00771984		17.6646	0.0244598	0.00679268
18.2279	0.0304377	0.0096068		17.4891	0.0264682	0.00757047		17.6284	0.0247748	0.00755048
18.1923	0.0284438	0.010836		17.453	0.0270876	0.00869203		17.5923	0.0243437	0.00684362
18.1567	0.0262297	0.00886595		17.4168	0.0269516	0.00696682		17.5561	0.0250551	0.00767417
18.1211	0.0276217	0.00972671		17.3806	0.0274329	0.00620298		17.5199	0.0247802	0.00644767
18.0855	0.0258692	0.0082736		17.3444	0.0249091	0.00801932		17.4837	0.0252811	0.0067683
18.0498	0.0274327	0.00852579		17.3082	0.0270119	0.00725768		17.4475	0.0252927	0.00846195
18.0142	0.0260491	0.0083881		17.2721	0.0253152	0.0080721		17.4114	0.0235811	0.00841943
17.9786	0.0270335	0.00707657		17.2359	0.0246163	0.0065055		17.3752	0.0232453	0.00826268
17.943	0.0262073	0.00972752		17.1997	0.0258004	0.00644923		17.339	0.0237317	0.00708611
17.9074	0.026076	0.00973854		17.1626	0.0230302	0.00738405		17.3028	0.0227267	0.00707769
17.8717	0.0241492	0.0090304		17.1264	0.026218	0.00627096		17.2666	0.0229797	0.00719073
17.8361	0.0245415	0.0086648		17.0903	0.024675	0.00680134		17.2305	0.0210192	0.00585861
17.8005	0.0251446	0.0102283		17.0541	0.0252222	0.00784783		17.1943	0.0223265	0.00773656
17.7649	0.0245946	0.00787882		17.0179	0.0265673	0.00738343		17.1581	0.0229146	0.00827214
17.7292	0.0251238	0.00971425		16.9817	0.0252372	0.00801861		17.1219	0.0222949	0.00600094
17.6936	0.0246855	0.00925139		16.9455	0.0248989	0.00775158		17.0857	0.0209345	0.00598909
17.658	0.0246056	0.00930358		16.9094	0.0248164	0.00687203		17.0496	0.0216385	0.00649474
17.6224	0.0261286	0.00766266		16.8732	0.0250994	0.00930494		17.0134	0.0218016	0.00696762
17.5868	0.0262124	0.00804417		16.837	0.0234611	0.00743321		16.9772	0.0200308	0.00682828
17.5511	0.0261702	0.00880025		16.8008	0.0221783	0.007968		16.941	0.0207701	0.00648454
17.5155	0.0254202	0.00910109		16.7647	0.0226176	0.00866923		16.9048	0.0202365	0.00655272
17.4799	0.0238815	0.00982975		16.7285	0.0235449	0.00820237		16.8687	0.021767	0.00554004
17.4437	0.0214464	0.00759124		16.6923	0.0222193	0.00832857		16.8325	0.0208765	0.0064847
17.4081	0.0238924	0.00735288		16.6561	0.0230977	0.007731		16.7957	0.0202189	0.00618749
17.3724	0.0234475	0.00850587		16.6199	0.0242386	0.00692848		16.7595	0.0218421	0.00642709
17.3368	0.022412	0.00937058		16.5838	0.0229588	0.0079298		16.7233	0.0197713	0.00649323
17.3012	0.0227486	0.00864791		16.5476	0.0219608	0.00746037		16.6872	0.0201791	0.0063711
17.2656	0.0226104	0.00865597		16.5114	0.0236443	0.00891761		16.651	0.0185236	0.00562886
17.23	0.0239994	0.00797657		16.4752	0.0224518	0.00725007		16.6148	0.0194457	0.00654688
17.1943	0.0230957	0.00874818		16.439	0.022823	0.00635036		16.578	0.0201164	0.0063484
17.1587	0.0218808	0.00818241		16.4029	0.0207195	0.00690382		16.5418	0.0200266	0.00617393
17.1231	0.022701	0.00697878		16.3667	0.0227976	0.00756862		16.5057	0.0193065	0.00780226
17.0875	0.0216656	0.00777035		16.3305	0.0217798	0.0068172		16.4695	0.0178072	0.00657835
17.0519	0.0234104	0.00999526		16.2943	0.020567	0.00809664		16.4333	0.0174454	0.00683765
17.0162	0.0221578	0.0079441		16.2581	0.0228482	0.00761436		16.3965	0.0179108	0.00732238
16.9806	0.0223436	0.00871957		16.222	0.0197129	0.00625644		16.3603	0.0183555	0.00669495
16.9444	0.0219562	0.0092876		16.1849	0.0211486	0.00869101		16.3242	0.0186965	0.0065158
16.9088	0.0213731	0.00870578		16.1487	0.0213824	0.0076035		16.288	0.020207	0.00683887
16.8732	0.0219231	0.00940727		16.1125	0.0207212	0.00622927		16.2518	0.0184284	0.00622779
16.8375	0.0222181	0.0103475		16.0763	0.0219847	0.0088824		16.215	0.0166513	0.00686713
16.8019	0.0210201	0.00836735		16.0402	0.0211641	0.00801263		16.1788	0.01759	0.00585808
16.7663	0.0203301	0.00865236		16.004	0.0183927	0.00625654		16.1427	0.0166421	0.00669381
16.7307	0.0218413	0.00899621		15.9669	0.0199661	0.00737596		16.1059	0.0165964	0.00662618
16.695	0.0213385	0.00862731		15.9307	0.0203845	0.00753922		16.0691	0.0159155	0.00736811
16.6594	0.0204179	0.00883646		15.8945	0.01963	0.00604823		16.0323	0.0168531	0.0062678
16.6238	0.0198384	0.00804237		15.8584	0.020289	0.00645641		15.9961	0.0167045	0.00584638
16.5882	0.0199009	0.00833626		15.8222	0.0189106	0.00607651		15.96	0.0169695	0.00644991
16.5526	0.0195472	0.00824534		15.786	0.0174965	0.00787621		15.9238	0.0158595	0.00643668
16.5169	0.0203061	0.00793073		15.7498	0.0204243	0.00639397		15.8876	0.0170519	0.00695281
16.4801	0.0211712	0.00703962		15.7136	0.0172351	0.00857714		15.8514	0.0162078	0.00630291
16.4445	0.0200894	0.0087721		15.6775	0.0183806	0.00602691		15.8152	0.0153756	0.00582724
16.4077	0.019906	0.00887694		15.6413	0.0195364	0.0067822		15.7785	0.0153905	0.00672466
16.3721	0.0185353	0.00776515		15.6051	0.0179439	0.00619748		15.7423	0.0164716	0.00617298
16.3365	0.0201122	0.00829287		15.5689	0.0181725	0.00620968		15.7061	0.0156212	0.00708652
16.3002	0.0202034	0.00772667		15.5327	0.0201672	0.00561924		15.6699	0.0149714	0.00610321
16.2646	0.0196657	0.00996285		15.4957	0.0177454	0.00576657		15.6337	0.0152975	0.00575165
16.229	0.0202848	0.00916761		15.4595	0.0191346	0.00717165		15.5976	0.0146397	0.006287
16.1934	0.0194664	0.00847364		15.4233	0.0192106	0.00714664		15.5614	0.0145331	0.00639945
16.1578	0.0185567	0.00720991		15.3862	0.0186168	0.00639848		15.5252	0.0154162	0.00516143
16.1221	0.0180591	0.00743538		15.35	0.0181328	0.00739275		15.4884	0.0141916	0.00612367
16.0865	0.0184869	0.00816088		15.3139	0.0177849	0.0067399		15.4516	0.0157505	0.00698865
16.0497	0.0174881	0.00746297		15.2777	0.0175128	0.00651225		15.4149	0.0158757	0.00572342
16.0141	0.0188764	0.00881243		15.2415	0.0173873	0.00724578		15.3787	0.0158215	0.00631365
15.9785	0.016925	0.00766008		15.2053	0.0199831	0.00716219		15.3419	0.0152138	0.00720035
15.9428	0.0166903	0.00787774		15.1682	0.0170451	0.00626828		15.3057	0.0154825	0.00588708
15.9066	0.0170168	0.00876356		15.1312	0.0163624	0.0062116		15.2695	0.0134686	0.00603105
15.8704	0.0171055	0.00685475		15.0941	0.0183579	0.00694849		15.2334	0.0141605	0.00660904
15.8336	0.0165473	0.00766522		15.0579	0.0171651	0.00600286		15.1966	0.0148674	0.00621286
15.7974	0.0159414	0.00705304		15.0208	0.0170884	0.00754455		15.1604	0.0136623	0.00532915
15.7612	0.0176633	0.0085718		14.9846	0.0160253	0.00792555		15.1236	0.0147215	0.00647894
15.7256	0.0163885	0.00747833		14.9475	0.0165704	0.00714817		15.0874	0.0128558	0.00587676
15.6899	0.0170151	0.00608536		14.9114	0.0161835	0.00588549		15.0507	0.0143786	0.00640762
15.6537	0.0176158	0.00806845		14.8752	0.01775	0.00707116		15.0145	0.0130379	0.00615606
15.6163	0.0169627	0.00668052		14.8381	0.0154612	0.00699035		14.9777	0.012781	0.00489596
15.5807	0.0178969	0.00816928		14.801	0.0142263	0.00542591		14.9415	0.0128427	0.00618504
15.5451	0.0182305	0.00806979		14.7648	0.0161774	0.00696577		14.9053	0.0130761	0.00562928
15.5089	0.0158674	0.00631795		14.7287	0.0162876	0.00583829		14.8673	0.0132888	0.00596588
15.4721	0.0164028	0.00769045		14.6925	0.0155585	0.00669175		14.8306	0.0126064	0.00516513
15.4364	0.0166239	0.00713452		14.6563	0.0171167	0.00714373		14.7944	0.0138182	0.00653909
15.4008	0.017554	0.00596751		14.6201	0.0153177	0.0053745		14.757	0.0139476	0.00506286
15.3652	0.0155146	0.00629063		14.5839	0.015714	0.00610323		14.7202	0.0126395	0.00572576
15.329	0.0167458	0.00599821		14.5478	0.0164252	0.00570813		14.6834	0.013458	0.00555226
15.2934	0.0177246	0.0088056		14.5107	0.0156548	0.00764698		14.6454	0.0133305	0.00642367
15.2577	0.0156549	0.00601384		14.4745	0.0158458	0.00718855		14.6087	0.0120978	0.00594535
15.2215	0.0144254	0.00667431		14.4383	0.0157807	0.00712828		14.5725	0.0133635	0.0057419
15.1847	0.0145328	0.00742687		14.4021	0.0157785	0.00603905		14.5357	0.0129348	0.0051754
15.1479	0.0166767	0.00619322		14.3641	0.0160804	0.00542129		14.4995	0.0115056	0.00579801
15.1111	0.0161607	0.00753984		14.328	0.0153224	0.00757247		14.4627	0.011739	0.00605751
15.0749	0.0148536	0.00759175		14.2909	0.0123877	0.00567242		14.4253	0.0111386	0.00530127
15.0375	0.0151811	0.00841022		14.2538	0.0168883	0.00713023		14.388	0.0120599	0.00595828
15.0019	0.0153172	0.00721489		14.2176	0.0130296	0.00580568		14.3506	0.0117667	0.00567524
14.9645	0.0146966	0.00748615		14.1787	0.0143253	0.00627281		14.3138	0.0108312	0.00513243
14.9288	0.014542	0.00818554		14.1425	0.0126059	0.00567205		14.277	0.0116974	0.00482201
14.8908	0.013585	0.00737395		14.1055	0.0133506	0.0065245		14.2402	0.0122189	0.00469895
14.8534	0.0148825	0.00761598		14.0693	0.0167577	0.00715867		14.2022	0.0130192	0.00551682
14.8178	0.0148018	0.00698216		14.0331	0.0133196	0.00504967		14.1649	0.0121991	0.00532517
14.7816	0.0145527	0.00677277		13.9942	0.0135351	0.00682057		14.1269	0.0109148	0.00567463
14.7454	0.0141062	0.00565584		13.958	0.0155271	0.00633587		14.0907	0.0105024	0.00549068
14.7092	0.0142584	0.00702496		13.92	0.016276	0.00577758		14.0533	0.0115837	0.00491172
14.6706	0.0147795	0.00702711		13.883	0.0144709	0.00686904		14.0159	0.0123873	0.00509093
14.632	0.0137236	0.00709691		13.8468	0.0136708	0.00619583		13.9797	0.0118061	0.0052284
14.594	0.0133674	0.00707352		13.8088	0.0150939	0.00664175		13.9424	0.0111321	0.0050676
14.5578	0.0140426	0.00742837		13.7717	0.0155993	0.00606125		13.9056	0.0119225	0.00505847
14.5192	0.0133086	0.0064381		13.7346	0.0152633	0.00657451		13.8688	0.0122999	0.00575377
14.4818	0.0130083	0.00698535		13.6984	0.0135984	0.00691713		13.8314	0.0110548	0.00525016
14.4456	0.0138412	0.00662617		13.6623	0.0148037	0.00609964		13.794	0.0103167	0.00485507
14.4099	0.0140094	0.00726347		13.6261	0.0152474	0.00867683		13.7578	0.0111566	0.00528842
14.3737	0.0135222	0.00616445		13.5872	0.0126065	0.00651376		13.7205	0.0107114	0.00537509
14.3375	0.0152497	0.00728215		13.5501	0.0139763	0.00602716		13.6837	0.011517	0.00498111
14.3001	0.014892	0.00710517		13.5121	0.0127427	0.00712224		13.6457	0.0113318	0.00594019
14.2639	0.0143689	0.00818962		13.4759	0.0136758	0.00612997		13.6071	0.0115029	0.00510291
14.2265	0.0139376	0.00633079		13.438	0.0132016	0.00699278		13.5697	0.0111041	0.00535271
14.1891	0.0147759	0.00774118		13.4018	0.0147988	0.00622967		13.5323	0.0115241	0.00486812
14.1523	0.0121761	0.00684538		13.3647	0.0126314	0.00549661		13.4955	0.0105312	0.0050423
14.1137	0.0130635	0.00651509		13.3267	0.0139234	0.00799872		13.4582	0.00942181	0.0047491
14.0769	0.0133374	0.00600319		13.2905	0.0125398	0.00756737		13.422	0.00999634	0.00544363
14.0413	0.0136117	0.00711315		13.2525	0.0123041	0.00578741		13.3858	0.0104387	0.00587798
14.0051	0.0132682	0.00645378		13.2164	0.0138039	0.00626253		13.349	0.0110225	0.00512658
13.9682	0.0124816	0.00744958		13.1793	0.0130638	0.00638892		13.3116	0.00976596	0.00412985
13.9314	0.0136724	0.006143		13.1422	0.012934	0.00699937		13.2742	0.00947879	0.00535485
13.8952	0.013068	0.00691929		13.1051	0.0139357	0.00705894		13.2375	0.0121096	0.00556347
13.856	0.0126877	0.00720875		13.068	0.0121461	0.00714581		13.2001	0.0101979	0.00488691
13.818	0.0127109	0.00743768		13.0318	0.0130876	0.00506175		13.1615	0.00947638	0.00516064
13.7789	0.0119764	0.00609834		12.9957	0.0130237	0.00592211		13.1235	0.00861954	0.00507228
13.7409	0.0132314	0.00702011		12.9586	0.01182	0.00539703		13.0855	0.0108056	0.00640525
13.7035	0.0127555	0.00793943		12.9224	0.0127615	0.00563495		13.0487	0.0100307	0.00502367
13.6643	0.0140312	0.00679458		12.8853	0.0127696	0.00597407		13.0101	0.00968177	0.00413202
13.6281	0.0129356	0.0063617		12.8491	0.0117952	0.00590832		12.9715	0.0101939	0.00493195
13.5913	0.0131816	0.00663333		12.8084	0.0103894	0.00615803		12.9336	0.00971623	0.00591896
13.5544	0.0121247	0.00550406		12.7695	0.0126287	0.00789988		12.8962	0.00862863	0.0053448
13.5153	0.0122235	0.00607829		12.7325	0.0115001	0.00567196		12.8588	0.00926624	0.00459393
13.4785	0.0115805	0.00580449		12.6936	0.0120526	0.00647871		12.8208	0.00990822	0.00485332
13.4416	0.0126388	0.00746449		12.6574	0.0131189	0.00700513		12.7828	0.00914293	0.00453499
13.4036	0.0124247	0.00611422		12.6212	0.0114039	0.00600759		12.7436	0.0097648	0.00542408
13.3657	0.0119249	0.00635001		12.5841	0.0122776	0.00525658		12.7056	0.0097845	0.00440116
13.3288	0.0122656	0.00680562		12.5479	0.0128256	0.006815		12.6688	0.0104345	0.00500319
13.2908	0.0125652	0.00636815		12.5099	0.0122378	0.00650884		12.629	0.00858011	0.00434939
13.2534	0.011754	0.00673988		12.4729	0.0119912	0.00533368		12.5904	0.00943888	0.0056546
13.2143	0.0135447	0.00658337		12.4358	0.0123185	0.00712363		12.5531	0.00951649	0.0056348
13.1775	0.0114095	0.00633709		12.3978	0.010662	0.00586994		12.5145	0.0100201	0.0045996
13.1377	0.0111121	0.00539973		12.3607	0.0115692	0.00656474		12.4753	0.0092362	0.00503804
13.1015	0.0121115	0.00629171		12.3236	0.010134	0.00547325		12.4337	0.00912555	0.00425148
13.0641	0.0124541	0.00742721		12.2847	0.0116941	0.00577592		12.3939	0.00865762	0.00462266
13.0255	0.0120124	0.00674329		12.2467	0.0116527	0.00537059		12.3535	0.00917152	0.00494038
12.9887	0.0115843	0.00716448		12.2097	0.0117915	0.00627917		12.3131	0.00808121	0.00532587
12.9495	0.0121485	0.00675531		12.1699	0.0122059	0.00612172		12.2703	0.00932522	0.00469259
12.9133	0.0119345	0.00692666		12.1319	0.0116279	0.00734374		12.2323	0.009271	0.00456479
12.8747	0.0114627	0.00571893		12.0939	0.0113674	0.00570249		12.1919	0.00772853	0.00436793
12.8367	0.0124276	0.00583877		12.055	0.0114002	0.00435531		12.1533	0.00804881	0.00459135
12.7987	0.0117394	0.00500839		12.0161	0.00915599	0.00584136		12.1129	0.00880175	0.00484947
12.7589	0.0108598	0.00702035		11.9763	0.01032	0.0051631		12.0737	0.00836505	0.0049425
12.7209	0.0117745	0.00593704		11.9392	0.0125166	0.00553776		12.0327	0.00862219	0.00506719
12.6847	0.0114746	0.00615647		11.9012	0.0107753	0.00565553		11.9947	0.00825866	0.00434519
12.6479	0.0101415	0.00511094		11.8632	0.00989065	0.00567945		11.9567	0.00901271	0.00516527
12.6069	0.00945914	0.00538379		11.8271	0.0113695	0.00528827		11.9145	0.00810503	0.00432346
12.5689	0.0122146	0.00691749		11.7864	0.00939829	0.00556216		11.8753	0.00895811	0.00412901
12.5297	0.0103412	0.00603055		11.7493	0.0101622	0.00638301		11.8373	0.00915336	0.00508839
12.4923	0.0103686	0.00579274		11.7122	0.00981791	0.00537261		11.7993	0.00800414	0.00462589
12.4567	0.0116259	0.00696764		11.6742	0.00949592	0.00563996		11.7589	0.00773958	0.00485633
12.4199	0.00993066	0.00504911		11.638	0.0123492	0.00765007		11.7203	0.00764887	0.00478419
12.3801	0.0109859	0.00510093		11.6009	0.0104109	0.00417404		11.6805	0.00734844	0.00471655
12.3439	0.010399	0.00501093		11.562	0.0100937	0.00652559		11.6438	0.00806538	0.00463396
12.3041	0.0102308	0.0054756		11.525	0.0110564	0.00666734		11.6052	0.00818933	0.00452359
12.265	0.0101477	0.00582065		11.4861	0.00978432	0.00536982		11.5672	0.00830313	0.00465946
12.227	0.0104271	0.00687694		11.449	0.00922792	0.00557573		11.528	0.00822627	0.00435348
12.1872	0.0102654	0.00744351		11.4092	0.0118023	0.00551402		11.4864	0.0087659	0.00430357
12.1444	0.0105742	0.00676861		11.3721	0.00841035	0.00542857		11.4454	0.00670037	0.00402379
12.1064	0.00909193	0.00575058		11.3305	0.00929328	0.00420508		11.4062	0.00861595	0.00496685
12.0667	0.0109816	0.0063815		11.2934	0.0106302	0.00539608		11.3646	0.00851851	0.00433053
12.0275	0.011477	0.00564242		11.25	0.00827227	0.00500303		11.323	0.0081193	0.00428272
11.9871	0.00993182	0.00549837		11.2093	0.0107229	0.00563603		11.285	0.00843849	0.0050571
11.9497	0.0102773	0.00657037		11.1695	0.00992741	0.00556874		11.247	0.00778288	0.00445805
11.9082	0.011732	0.00664635		11.1288	0.00750337	0.00518738		11.2054	0.00733767	0.00442034
11.8672	0.00975621	0.00601123		11.0917	0.00925912	0.00534284		11.1656	0.0080452	0.00532039
11.8256	0.00983318	0.00562257		11.051	0.00954937	0.00562177		11.1258	0.00665032	0.00404522
11.7847	0.01017	0.00553839		11.0085	0.00963673	0.00573908		11.0842	0.00659381	0.00445262
11.7455	0.010026	0.00614425		10.9687	0.0092607	0.00520584		11.0402	0.0067288	0.00481117
11.7081	0.0100504	0.00561775		10.9262	0.00952169	0.00553793		10.9955	0.00634979	0.00445902
11.6671	0.00974176	0.0060495		10.8864	0.0084511	0.00388529		10.9539	0.00814117	0.00430146
11.6262	0.00992179	0.00600967		10.8457	0.00807837	0.00575767		10.9147	0.00727895	0.00479916
11.5876	0.0111399	0.00585041		10.8068	0.00765467	0.00468019		10.8755	0.00661821	0.00374157
11.5472	0.0105499	0.0056673		10.7679	0.00826251	0.00408831		10.8339	0.00873274	0.00487681
11.505	0.0113644	0.00532701		10.7227	0.00981572	0.00590586		10.7911	0.00826892	0.00473523
11.4653	0.00880317	0.00624514		10.6847	0.00998083	0.00479125		10.7495	0.00701039	0.00370901
11.4261	0.00977819	0.0060391		10.6431	0.00760318	0.00474092		10.7079	0.00763702	0.00418787
11.3881	0.0104331	0.0059211		10.6015	0.0090312	0.005528		10.6675	0.00567593	0.00361037
11.3489	0.0107714	0.00594676		10.5635	0.00875377	0.00543566		10.6289	0.00695539	0.00379138
11.3079	0.00965875	0.00575901		10.5273	0.00716658	0.00470213		10.5873	0.00746629	0.00435979
11.2699	0.00949278	0.00577429		10.4857	0.009117	0.00510262		10.5439	0.0064821	0.00392413
11.2331	0.00892055	0.00591539		10.4477	0.00990889	0.00535999		10.4993	0.00688081	0.00354746
11.1963	0.0102726	0.00564729		10.4052	0.00817658	0.00479422		10.4589	0.00605029	0.00430911
11.1548	0.00876345	0.00473048		10.3654	0.00823805	0.00498034		10.4185	0.00704617	0.00386702
11.1162	0.00985633	0.0049648		10.3247	0.00870277	0.00459456		10.3763	0.00644187	0.00431285
11.0728	0.00982458	0.00513958		10.284	0.00847388	0.00474309		10.3347	0.00693618	0.00421258
11.0331	0.00962859	0.0056993		10.2379	0.00706688	0.00500724		10.2937	0.00700133	0.00385709
10.9915	0.00958365	0.00547674		10.1954	0.00775775	0.00521709		10.2508	0.00700503	0.0042413
10.9488	0.00877642	0.00547575		10.1538	0.00770447	0.00440793		10.2014	0.00710674	0.00428289
10.9108	0.00933041	0.00537361		10.114	0.00829685	0.00511262		10.1598	0.00698557	0.00378671
10.8686	0.00880512	0.00508511		10.0751	0.007926	0.00476478		10.1176	0.00681578	0.00434464
10.8259	0.00934937	0.00579589		10.0326	0.00725055	0.00460245		10.0748	0.00660576	0.00386937
10.7843	0.00890131	0.00576072		9.99096	0.00771539	0.00494596		10.0326	0.00882045	0.00416633
10.7427	0.00924388	0.0052738		9.94844	0.00851762	0.00478318		9.98794	0.00565617	0.00399462
10.7006	0.0102519	0.00558803		9.90322	0.00725683	0.00511558		9.9397	0.00676042	0.00362849
10.6579	0.00901815	0.00517911		9.8598	0.00743314	0.005066		9.89508	0.00614728	0.00385217
10.6151	0.0100589	0.00576853		9.81639	0.00759589	0.00494876		9.85408	0.00565449	0.00339715
10.573	0.00852974	0.00552736		9.77026	0.0085038	0.0050064		9.80523	0.00635405	0.0038485
10.532	0.00994072	0.00530276		9.72865	0.00688343	0.00434613		9.76483	0.00656775	0.00390961
10.4922	0.00899967	0.00580021		9.68343	0.00764874	0.00490291		9.72021	0.00671515	0.00380324
10.4501	0.00900943	0.00583973		9.64544	0.00884366	0.00529152		9.67559	0.00623629	0.00433813
10.4085	0.00894197	0.00555759		9.60384	0.00700006	0.00503991		9.63278	0.00631277	0.00467558
10.3658	0.00818452	0.00551018		9.55861	0.00797845	0.00544248		9.59057	0.00634144	0.00421404
10.3278	0.00925462	0.00544476		9.5152	0.00690767	0.00463038		9.54715	0.00619253	0.00421189
10.285	0.00907985	0.00596866		9.47178	0.00739246	0.0049572		9.49952	0.00721351	0.00462024
10.2441	0.00892308	0.00570336		9.42565	0.00673461	0.00478047		9.45429	0.00747555	0.00398591
10.2019	0.00837929	0.00547789		9.37138	0.00887091	0.00582222		9.40425	0.00614903	0.00384873
10.1597	0.00817331	0.00549821		9.32706	0.00571146	0.00465517		9.36384	0.00573474	0.00365545
10.1164	0.00994398	0.00573077		9.28455	0.00759251	0.00433326		9.31621	0.00615514	0.00426445
10.0725	0.0080274	0.0050211		9.23661	0.00654642	0.00449344		9.26857	0.007923	0.00445384
10.0285	0.00850156	0.0050743		9.18415	0.00721935	0.00417487		9.22697	0.00651853	0.00417572
9.98936	0.00848159	0.00495472		9.13622	0.0077566	0.0045127		9.18355	0.00711877	0.0042373
9.94365	0.00864884	0.00540017		9.09009	0.00740435	0.0043469		9.13531	0.0051711	0.00366685
9.90328	0.00956153	0.00632607		9.04486	0.00660603	0.00392235		9.08888	0.00570675	0.00401559
9.8635	0.00868144	0.00530723		8.99873	0.00607156	0.00396794		9.03702	0.00551611	0.00313288
9.82194	0.00836908	0.00508963		8.9526	0.00650816	0.0045215		8.98396	0.00603649	0.00351945
9.77979	0.00877406	0.00548939		8.89924	0.00781624	0.00448433		8.93693	0.00541612	0.00364341
9.73823	0.00858032	0.00570024		8.85492	0.00699376	0.00475635		8.8911	0.00629621	0.00412517
9.69549	0.00894235	0.00652654		8.81331	0.00788517	0.00558798		8.84467	0.00618613	0.00415277
9.65333	0.00774686	0.00577163		8.76357	0.00683557	0.00361582		8.80005	0.00605362	0.00393368
9.61178	0.00862731	0.00551936		8.71744	0.00721755	0.00490764		8.74457	0.0056988	0.00373344
9.5625	0.00751808	0.00482659		8.66588	0.00804572	0.00509142		8.69754	0.00612629	0.00362078
9.50966	0.00832478	0.00561974		8.61161	0.00676068	0.00416739		8.65051	0.00612224	0.00411224
9.46514	0.00798223	0.00588407		8.56096	0.00705166	0.00467964		8.60649	0.00638209	0.00426342
9.42358	0.00740077	0.00473687		8.51483	0.00663998	0.00388866		8.55342	0.0065051	0.00420781
9.37727	0.00753113	0.00555228		8.46961	0.00577854	0.00386947		8.49735	0.00562372	0.00360676
9.33631	0.00762031	0.00479698		8.42529	0.00709961	0.00428758		8.44489	0.00533027	0.00343466
9.29297	0.00801896	0.00560098		8.37283	0.00631273	0.00412739		8.39484	0.00639035	0.00404741
9.24666	0.00775296	0.00499695		8.32851	0.00576606	0.00447047		8.34781	0.00563317	0.00366777
9.1962	0.0090111	0.00519137		8.28057	0.00717961	0.0044966		8.29655	0.00625715	0.00389471
9.15048	0.00704061	0.00489099		8.2263	0.00750094	0.00453969		8.24952	0.00594049	0.00345772
9.10952	0.00841862	0.00510163		8.17836	0.00664282	0.00401264		8.19947	0.00580173	0.00373434
9.0644	0.00840463	0.0052955		8.12952	0.00698979	0.00496164		8.15304	0.00567698	0.0035622
9.01453	0.00832616	0.00537324		8.07706	0.00626205	0.00483328		8.09575	0.0053713	0.00294571
8.96703	0.0079715	0.004865		8.02732	0.00709049	0.00470681		8.04631	0.00573586	0.00374754
8.91657	0.007128	0.00483418		7.98571	0.0075063	0.00458975		7.99325	0.00501772	0.00394705
8.86848	0.00810093	0.00530161		7.92963	0.00505873	0.00331612		7.94501	0.0058739	0.00389044
8.82217	0.00684588	0.00493452		7.88169	0.00677493	0.0044606		7.88953	0.00573594	0.00368226
8.77587	0.00784664	0.00513357		7.83556	0.00609919	0.00427929		7.83828	0.00541192	0.00369991
8.73193	0.00856939	0.00549896		7.79305	0.00600839	0.00428117		7.78341	0.0057728	0.00398046
8.68503	0.00858191	0.00481352		7.74421	0.00685752	0.00454746		7.73336	0.0052541	0.00321415
8.63754	0.007514	0.00491341		7.69537	0.00785338	0.00503307		7.68512	0.00608031	0.00399234
8.5942	0.008595	0.00556021		7.64834	0.00608969	0.00379566		7.63628	0.0063765	0.00352445
8.54849	0.00870075	0.00510132		7.59949	0.00636521	0.0046909		7.57779	0.00572452	0.00366672
8.49862	0.00782314	0.00490487		7.55246	0.00657494	0.00411792		7.52171	0.00462037	0.0034993
8.44993	0.00746695	0.00585401		7.5009	0.00715088	0.00544667		7.46503	0.00551727	0.00374558
8.40541	0.00873751	0.00543648		7.44392	0.0063644	0.00415076		7.40473	0.00563433	0.00434729
8.36147	0.0074324	0.00569387		7.38694	0.00596437	0.00437555		7.35709	0.00600958	0.00368391
8.30864	0.00684141	0.0044719		7.33629	0.00613431	0.00425616		7.30644	0.00519299	0.00384131
8.26114	0.00776497	0.00486137		7.28111	0.00542159	0.0042211		7.24493	0.00572572	0.00387512
8.21305	0.00701785	0.00440381		7.23227	0.00562528	0.00354881		7.19308	0.00588643	0.00425153
8.16437	0.0078652	0.00480409		7.16896	0.00722442	0.00452997		7.14363	0.00586349	0.00344312
8.11925	0.00706093	0.0048203		7.11378	0.00555435	0.00397206		7.0966	0.00539972	0.003735
8.07354	0.00802295	0.005031		7.05861	0.00714283	0.0046083		7.04655	0.00592137	0.00369415
8.02842	0.00795045	0.00491086		7.00615	0.00603308	0.00459873		6.99168	0.00541403	0.00368278
7.98389	0.00812164	0.00477731		6.94465	0.00631396	0.00393572		6.93922	0.00529439	0.00343368
7.93758	0.00648531	0.00442028		6.88947	0.00721806	0.00437906		6.88616	0.00539649	0.00380413
7.89246	0.00759805	0.00442664		6.83701	0.00582348	0.00376449		6.83068	0.00540482	0.00367731
7.84615	0.00732609	0.00415001		6.77912	0.0061518	0.00425184		6.77882	0.00647323	0.00447498
7.79569	0.00793696	0.00534966		6.72666	0.00619921	0.00474936		6.73058	0.00563002	0.00381986
7.74998	0.00798256	0.00461295		6.66968	0.00681636	0.00495829		6.67873	0.00519676	0.00350641
7.69951	0.00797342	0.00496885		6.61089	0.00598444	0.00343688		6.62144	0.00585906	0.00423603
7.65321	0.00689764	0.00447227		6.55029	0.00477624	0.00343934		6.572	0.00654191	0.00390447
7.60868	0.00732234	0.0049089		6.50145	0.00503792	0.00363994		6.51773	0.00555486	0.00329858
7.5594	0.00767704	0.00567544		6.44718	0.00793424	0.00514425		6.45683	0.00573471	0.0034756
7.50953	0.00782802	0.00475188		6.38748	0.00654859	0.00491395		6.4104	0.00515338	0.00352575
7.46085	0.00694853	0.00522424		6.32869	0.00551684	0.00393547		6.35974	0.00569253	0.00392695
7.40801	0.00701	0.00492297		6.27804	0.00530273	0.00363456		6.30608	0.00582774	0.00316743
7.36349	0.00730598	0.00523025		6.20749	0.00561887	0.0041314		6.25422	0.00501013	0.00290522
7.31184	0.00799077	0.004414		6.1487	0.00565515	0.0034654		6.19633	0.00571238	0.00319512
7.26434	0.00743619	0.00541652		6.09986	0.0050351	0.0041444		6.14267	0.00531363	0.00382891
7.21269	0.00668216	0.00494881		6.0483	0.00587285	0.00443521		6.0896	0.00514529	0.00346507
7.1652	0.00779979	0.00427764		5.99132	0.00440682	0.00396205		6.04016	0.00511088	0.00376975
7.11473	0.00643146	0.00500976		5.92981	0.00544259	0.00327498		5.9871	0.00535382	0.00351988
7.06902	0.00665559	0.00390637		5.86831	0.00615382	0.00417697		5.93524	0.00608395	0.00370764
7.01737	0.00774699	0.00546588		5.81132	0.00584049	0.00421224		5.87976	0.00471878	0.00335027
6.96512	0.00664506	0.0040315		5.75705	0.00569	0.00410837		5.82369	0.00515117	0.00378518
6.91229	0.0075052	0.00543408		5.70279	0.00615505	0.0041072		5.767	0.00493899	0.00358001
6.8636	0.00683403	0.00508303		5.6449	0.00558686	0.0037513		5.70731	0.00538519	0.0037996
6.81195	0.00726658	0.00473156		5.58249	0.0057709	0.00418286		5.65545	0.00471382	0.00334375
6.76743	0.00712868	0.00511778		5.5246	0.00626599	0.00390689		5.59636	0.00540319	0.00387934
6.71815	0.00615238	0.00457115		5.47395	0.00492094	0.00395994		5.53365	0.00575305	0.00349162
6.66888	0.00780248	0.00498448		5.4242	0.00638981	0.00401686		5.47516	0.00483702	0.00314586
6.62257	0.00719118	0.00448194		5.36541	0.00480694	0.00297994		5.41606	0.00578402	0.0041654
6.57626	0.00654783	0.00422049		5.3021	0.00627286	0.00341297		5.36662	0.00532282	0.00294476
6.52461	0.00628577	0.00456808		5.24873	0.00583872	0.00361615		5.31235	0.00534258	0.00370008
6.47652	0.00731373	0.00457133		5.19085	0.00598207	0.00401495		5.25386	0.00504785	0.0032609
6.43081	0.00634013	0.00499807		5.14562	0.00715321	0.00422384		5.19959	0.00522688	0.00348536
6.38509	0.00621174	0.00369438		5.08231	0.00472672	0.00344072		5.14472	0.0048419	0.00365097
6.34057	0.00771244	0.00479694		5.0208	0.00537394	0.00386468		5.09286	0.00565155	0.00389241
6.29129	0.00725908	0.00487406		4.96834	0.00601763	0.00384255		5.04462	0.00547627	0.0040251
6.24142	0.00664819	0.004202		4.92221	0.004798	0.00362651		4.98191	0.00531094	0.00394182
6.18918	0.00732794	0.00454456		4.858	0.00541499	0.00408279		4.9192	0.00572967	0.00283944
6.13396	0.00746319	0.00518518		4.7974	0.00547367	0.00349359		4.85709	0.00551581	0.00392748
6.07994	0.00765595	0.00447062		4.73499	0.00526455	0.0038023		4.80644	0.00527143	0.00344171
6.02888	0.00731911	0.00538507		4.67167	0.00629092	0.00378585		4.75277	0.00507505	0.00341835
5.97723	0.00602981	0.00438489		4.60836	0.00506166	0.00323366		4.69247	0.00500264	0.00317326
5.92914	0.00727204	0.00429873		4.55137	0.00558646	0.00379587		4.63097	0.00503894	0.00387964
5.88105	0.00710609	0.00490754		4.48354	0.00474426	0.00341821		4.57067	0.00517381	0.00356051
				4.42746	0.00645466	0.00416246		4.51218	0.00459642	0.00334107
				4.37138	0.0050608	0.00408534		4.45731	0.00514402	0.0041541
				4.30264	0.00550643	0.0036271		4.39158	0.00603379	0.00458849
				4.23842	0.00548147	0.00426969		4.32887	0.00473428	0.00337041
				4.17963	0.00544965	0.00375035		4.2734	0.00608064	0.00411413
				4.12355	0.00529696	0.00412909		4.2137	0.00453494	0.00339106
				4.06567	0.00610179	0.00394705		4.15822	0.00527413	0.00344754
				4.00868	0.00537759	0.00389292		4.09732	0.00579773	0.00393807
				3.96346	0.00573652	0.00404367		4.03341	0.00493431	0.00360913
				3.90105	0.00583424	0.00358727		3.97552	0.00525207	0.00348101
				3.83231	0.00545379	0.00358296		3.92004	0.00441837	0.0028775
				3.77985	0.00518612	0.00423331		3.85311	0.00508496	0.00378553
				3.72196	0.00589372	0.00394163		3.80005	0.00459999	0.00309911
				3.66136	0.00529914	0.00404658		3.73613	0.00456637	0.00280908
				3.59262	0.00572563	0.00358377		3.67463	0.00505622	0.00320099
				3.52659	0.0060375	0.00427896		3.61433	0.00526506	0.00394053
				3.45604	0.00558021	0.00396709		3.55463	0.00543793	0.00374269
				3.39906	0.00525224	0.00371517		3.49976	0.00494048	0.00367514
				3.33394	0.00680091	0.00418719		3.43886	0.00507334	0.00352849
				3.27695	0.00568823	0.00409759
				3.21002	0.00526407	0.0038846
				3.15575	0.00463839	0.00348923
				3.08249	0.00460512	0.00333773
				3.03365	0.00560471	0.00417652

## Sheet: Figure 8
Additive concentration (ppm)	n-heptane-F100	standard deviation	n-heptane-FM100	standard deviation	n-heptane-FC100	standard deviation
0 (n-heptane)	1647.59	23.1478	1647.59	23.1478	1647.59	23.1478
100	1599.16	20.3375	1625.55	14.497	1631.65	21.0106
500	1563.23	18.7975	1604.77	23.4496	1584.67	28.1503
